# Supplementary material for: Dominant neoantigen verification in hepatocellular carcinoma by a single-plasmid system coexpressing patient HLA and antigen
Source: PubMed Central journal article supplement — J Immunother Cancer. 2023 Apr 17;11(4):e006334. doi: 10.1136/jitc-2022-006334 (PMC10124323; doi:10.1136/jitc-2022-006334), 2023-04-17
Supplement: jitc-2022-006334supp001.pdf [file jitc-2022-006334supp001.pdf]

**Dominant neoantigen verification in hepatocellular carcinoma by a  
single-plasmid system coexpressing patient HLA and antigen**

**AUTHORS**

Pu Chen<sup>1†</sup>, Dongbo Chen<sup>1†\*</sup>, Dechao Bu<sup>2</sup>, Jie Gao<sup>3</sup>, Wanying Qin<sup>4</sup>, Kangjian Deng<sup>4</sup>,  
Liyang Ren<sup>1</sup>, Shaoping She<sup>1</sup>, Wentao Xu<sup>4</sup>, Yao Yang<sup>1</sup>, Xingwang Xie<sup>1,5\*</sup>, Weijia  
Liao<sup>4\*</sup> and Hongsong Chen<sup>1\*</sup>

<sup>1</sup>Peking University People's Hospital, Peking University Hepatology Institute, Beijing  
Key Laboratory of Hepatitis C and Immunotherapy for Liver Disease, Beijing  
International Cooperation Base for Science and Technology on NAFLD Diagnosis,  
Beijing 100044, China;

<sup>2</sup>Research Center for Ubiquitous Computing Systems, Institute of Computing  
Technology, Chinese Academy of Sciences, Beijing 100190, China;

<sup>3</sup>Department of Hepatobiliary Surgery, Peking University People's Hospital, Beijing  
100044, China;

<sup>4</sup>Laboratory of Hepatobiliary and Pancreatic Surgery, Affiliated Hospital of Guilin  
Medical University, Guilin 541001, Guangxi, China;

<sup>5</sup>Corregene Biotechnology Co., Ltd, Beijing 102206, China.

<sup>†</sup>These authors contributed equally to this work.

<sup>\*</sup>These authors contributed equally to this work and shared senior authorship.

**\*CORRESPONDENCE**

chenhongsong@bjmu.edu.cn (H.S. Chen), chendongbo338@bjmu.edu.cn (D.B.  
Chen), liaoweijia288@163.com (W.J. Liao), xiexingwang@corregene.com (X.W.  
Xie).

## TABLE OF CONTENTS

|                                                                                 |    |
|---------------------------------------------------------------------------------|----|
| SUPPLEMENTAL MATERIALS AND METHODS.....                                         | 3  |
| 1. Patients and sample collection.....                                          | 3  |
| 2. Extraction and next-generation sequencing (NGS) of DNA and RNA.....          | 3  |
| 3. Variation calling .....                                                      | 5  |
| 4. Neoantigen prediction.....                                                   | 6  |
| 5. Establishment, validation and application of the Co-HA system.....           | 8  |
| 6. Amplification of neoantigen-specific T cells in peripheral blood .....       | 14 |
| 7. Tetramer staining .....                                                      | 15 |
| 8. Antitumor efficacy of <i>ENTPD6</i> neoantigen-specific T cells in vivo..... | 16 |
| 9. Quantification and statistical analysis .....                                | 16 |
| Supplemental figure 1 .....                                                     | 17 |
| Supplemental figure 2 .....                                                     | 18 |
| Supplemental figure 3 .....                                                     | 19 |
| Supplemental figure 4 .....                                                     | 20 |
| Supplemental figure 5 .....                                                     | 21 |
| Supplemental figure 6 .....                                                     | 22 |
| Supplemental figure 7 .....                                                     | 23 |
| Supplemental figure 8 .....                                                     | 24 |
| Supplemental figure 9 .....                                                     | 25 |
| Supplemental figure 10.....                                                     | 26 |
| Supplemental figure 11 .....                                                    | 27 |
| Supplemental figure 12 .....                                                    | 28 |
| Supplemental figure 13 .....                                                    | 29 |
| Supplemental table 1.....                                                       | 30 |
| Supplemental table 2.....                                                       | 30 |
| Supplemental table 3.....                                                       | 31 |
| Supplemental table 4.....                                                       | 32 |
| Supplemental table 5.....                                                       | 32 |
| Supplemental plasmid sequence.....                                              | 33 |
| REFERENCES .....                                                                | 44 |

## **SUPPLEMENTAL MATERIALS AND METHODS**

### **1. Patients and sample collection**

We enrolled 14 patients with hepatocellular carcinoma (HCC) who underwent curative resection, including 6 patients from the Peking University People's Hospital and 8 patients from the Affiliated Hospital of Guilin Medical University. All cases were confirmed by pathology reports. The study was approved by the Research Ethics Committees of the Peking University People's Hospital and the Affiliated Hospital of Guilin Medical University. All patients provided written informed consent. Tumor tissues, nontumor liver tissues (nearby tissues > 2 cm away from tumor tissue margin) and portal vein tumor thrombi (PVTs) were collected and frozen in liquid nitrogen for further processing. Peripheral blood mononuclear cells (PBMCs) were isolated from fresh peripheral blood of patients or healthy donors by Ficoll density gradient centrifugation. They were immediately frozen in  $-80^{\circ}\text{C}$  and transferred to liquid nitrogen the next day. COS-7 cells, HEK293T cells, PLC/PRF/5 cells, Hep3B cells and HepG2 cells were purchased from American Type Culture Collection (ATCC). Huh-7 cells were purchased from Cell Resource Center, Institute of Basic Medical Sciences, Chinese Academy of Medical Sciences.

### **2. Extraction and next-generation sequencing (NGS) of DNA and RNA**

#### **2.1 Extraction and quality control of DNA and RNA**

DNA and RNA were extracted from fresh-frozen samples using AllPrep DNA/RNA Mini Kit (QIAGEN) following the protocol of the manufacturer. The quantity and quality of DNA and RNA were determined by Qubit Fluorometer (Invitrogen) and agarose gel electrophoresis generally. Fragment Analyzer 5400 (Agilent) was used for

accurate verification. At least 1.5 µg high quality genomic DNA and 1.0 µg high quality RNA were prepared for subsequent experiments.

## 2.2 Whole exome sequencing (WES)

WES was performed using SureSelect Human All Exon V6 (Agilent) according to the manufacturer's instructions. We first used the Covaris to randomly fragment DNA sample to an average of 180 - 280 bp. Fragments were end-repaired, and an extra A base was added to the 3' end. Illumina adaptors were ligated to the fragments. Subsequently, we used SPRI beads to purify and acquire the library. After the solution hybridization of the library and biotin-labeled probes, we used beads to capture exome and then performed PCR amplification. The quality was determined by Qubit Fluorometer (Invitrogen) and Fragment Analyzer 5400 (Agilent). Furthermore, the effective concentration of the library was accurately quantified by quantitative real time PCR (qPCR). The library was sequenced by Illumina NovaSeq 6000 platform. Finally, raw data was filtered to obtain high-quality clean reads for further analysis.

## 2.3 RNA-sequencing (RNA-seq)

The library was acquired by NEBNext Ultra™ RNA Library Prep Kit for Illumina. First, we used beads to capture mRNA from total RNA and fragment it. Then, we used M-MuLV Reverse Transcriptase and random hexamer primer to synthesize first strand cDNA and used RNase H and DNA Polymerase I to perform second strand cDNA synthesis. Remaining overhangs were converted into blunt ends via exonuclease/polymerase activities. After adenylation of 3' ends of DNA fragments, NEBNext Adaptor with hairpin loop structure were ligated to prepare for hybridization. The library fragments were purified with AMPure XP system

(Beckman Coulter). Subsequently, 3  $\mu$ l USER Enzyme (NEB) was used with size-selected, adaptor-ligated cDNA at 37°C for 15 min followed by incubation at 95°C for 5 min. Furthermore, we performed PCR to acquire products and used AMPure XP system to purify them. Fragment Analyzer 5400 (Agilent) were used to quantitate the products. The clustering of the index-coded samples was performed on a cBot Cluster Generation System using TruSeq PE Cluster Kit v3-cBot-HS (Illumina). After cluster generation, the library was sequenced on Illumina NovaSeq 6000. Finally, raw data was filtered to obtain high-quality clean reads for subsequent analysis.

### 3. Variation calling

#### 3.1 Base substitution, mutational signatures, mutated genes and evolutionary tree of the samples

For single nucleotide variants (SNVs), we analyzed the number of 6 different types of base substitutions including A>C, A>G, A>T, C>A, C>G and C>T, and calculated their proportions. Further, each of the substitutions was examined by incorporating information on the bases immediately 5' and 3' to each mutated base generating 96 possible triplet nucleotides (6 types of substitution  $\times$  4 types of 5' base  $\times$  4 types of 3' base). We calculated the proportion of each triplet nucleotide and identified the 30 mutational signatures from COSMIC database (<https://cancer.sanger.ac.uk/cosmic>) by the R package “deconstructSigs”. Subsequently, we analyzed the abundance of each mutational signatures.

The gene that had at least one mutation was defined as mutated gene. And we focused our analysis on the high-frequency mutated genes, pan-cancer driver mutated genes<sup>[1]</sup>, HCC driver mutated genes (according to previous reports and NCG7.0 database,

<http://ncg.kcl.ac.uk/index.php>)<sup>[2-6]</sup>, immune-related mutated genes (according to GSEA, <https://www.gsea-msigdb.org/gsea/index.jsp>) and cytotoxic T lymphocyte (CTL)-evasion mutated genes<sup>[7]</sup>. The TMB for each sample was calculated as the number of mutations per 36 megabase (Mb) of gene, and the mutated frequency for each gene was the proportion of patients who had mutated genes in all patients.

We constructed an  $M \times N$  matrix based on the occurrence of mutations in different samples.  $M$  was the number of mutations and  $N$  was the number of samples. The status of the mutation was 0 or 1, where 0 was unmutated and 1 was mutated. In addition, a negative control sample was added as negative control (NC), and the mutation frequency of all sites was defined as 0. Then phylograms were inferred using the R package “phangorn”. The parsimony ratchet method was used to search for the best tree and acctran function was used to get edge length according to the ACCTRAN criterion<sup>[8]</sup>.

### 3.2 Base substitution and mutated genes of HCC in TCGA database and reference mutational signatures in COSMIC database

Effective mutation analysis is the basis of neoantigen prediction. We used other database to verify the reliability of mutations from our samples. The data for analysis of base substitution and mutated genes of HCC were downloaded from the GDC data portal of TCGA database (<https://www.cancer.gov/>) and the used R package was “maftools”. Reference mutational signatures were downloaded from COSMIC database.

## 4. Neoantigen prediction

### 4.1 Affinity prediction between neoantigens and human leukocyte antigens (HLAs)

We used OptiType<sup>[9]</sup>, a new algorithm based on integer linear programming, to

analyze the HLA types of patients from WES data of nontumor liver tissues or PBMCs and used LOHHLA<sup>[10]</sup> to predict potential loss of heterozygosity (LOH) of HLAs from WES data of tumor tissues. At the same time, we used Variant Effect Predictor (VEP)<sup>[11]</sup> to predict mutated proteins from somatic mutations and disassembled the mutated proteins to potential mutated peptides. Then, we used Genome Analysis Toolkit (GATK) ASEReadCounter<sup>[12]</sup> to detect mutation count (MutCount) of potential mutated peptide from RNA sequencing (RNA-seq) data. Subsequently, the NetMHCpan-4.1 algorithm<sup>[13]</sup> was used to determine the affinity of the mutated peptides to the patient's HLAs. Finally, we filtered the data based on mutated peptide affinity (MutAff)  $\leq 200$  nM or referenced peptide affinity (RefAFF) / MutAff  $\geq 10$  in the case of excluding duplication and LOH of HLAs and predicted potential neoantigens.

#### 4.2 Selection of indexes and filter values

Prediction with computer algorithms aimed at assessing affinity between neoantigens and HLAs is currently the main strategy for clinical neoantigen screening<sup>[14]</sup>. The common indexes for filtering neoantigens are MutAff, RefAFF / MutAff and the rank of mutated peptide affinity (Mutrank).

The common filter value of MutAff is 500 nM or lower, the RefAFF / MutAff is 1 or higher and the Mutrank is 2 or lower<sup>[15-16]</sup>. Because neoantigens have high heterogeneity in different tumors and population, the selection of indexes and filter values should be personalized<sup>[17]</sup>.

Single nucleotide polymorphisms (SNPs) are one of the most common types of genetic variation among people. The mutated peptides from SNPs could not induce a strong immune response. We used VEP to predict mutated proteins from SNPs in

nontumor liver tissues and disassembled the mutated proteins to potential mutated peptides as negative dataset<sup>[18]</sup>. The frequency of the SNPs is 10% or more and the MutCount of potential mutated peptide is 5 or more. Positive dataset consisted of the neoantigens with high confidence collected by Tan et al<sup>[19]</sup>, and the neoantigens without the paired wild types were eliminated. Then we used the negative dataset and the positive dataset to determine appropriate indexes and filter values. We found the increasing filter values of MutAff and Mutrank or the declining filter value of RefAFF / MutAff could induce more candidate neoantigens and the real neoantigens but less proportion of real neoantigens in candidate neoantigens (supplemental figure 6A-C). When the same amount of neoantigens were screened by different indexes, neoantigen proportions screened by MutAff and RefAFF / MutAff were higher than those screened by Mutrank (supplemental figure 7A-C). In our study, we excluded inferior Mutrank and selected  $\text{MutAff} \leq 200$  nM and  $\text{RefAFF} / \text{MutAff} \geq 10$  to balance the number and the proportion of the screened neoantigen for these HCC samples.

## 5. Establishment, validation and application of the Co-HA system

### 5.1 Construction of the *KRAS* G12D TCR-T cells

The starting vector was lenti-BSD-T2A-EGFP. This vector was constructed by CorreGene. The vector map is shown in supplemental figure 1A (supplemental plasmid sequence NO. 1). The gene segment of *EGFP* in vector were released from the vector by cleavage with restriction enzymes BfuAI (NEB) and EcoRI (NEB), and the vector without *EGFP* was recovered from the gel. Meanwhile, we entrusted Synbio Technologies to synthesize the gene segment of the *KRAS* G12D TCR, including TK412 V $\beta$ , Cys mTRBC1, P2A, TK412 V $\alpha$  and LVL\_Cys mTRAC, as



described by Wang et al<sup>[20]</sup>. Gibson Assembly was then performed to assemble the TCR gene segment into the viral vector without *EGFP* to construct the TCR plasmid lenti-BSD-T2A-TK412 (supplemental figure 1A, supplemental plasmid sequence NO. 2). The 3589 bp gene segment was successfully excised from the TCR plasmid by restriction enzymes NotI (NEB) and BamHI (NEB) for verification (supplemental figure 1B). PBMCs from healthy donors were cultured in X-VIVO 15 medium (Lonza) supplemented with 5% Human AB serum (GemCell), 100 U/ml penicillin (Gibco), 100 µg/ml streptomycin (Gibco), 100 IU/ml IL-2 (R&D) and 10 µL T Cell TransAct EA (Miltenyi). According to the methods of production and infection of lentivirus in the previous research of our group<sup>[21]</sup>, the TCR plasmid and assistant plasmid pVSVg (AddGene 8454) and psPAX2 (AddGene 12260) were cotransfected into HEK293T cells. After 48 hours, the supernatant of the virus was collected and centrifuged for 10 min with 2,000 g. The debris was removed by 0.45 µm filter (Millipore). The lentivirus was concentrated with Macrosep Advance Centrifugal Device (100K, PALL) and then the titer was determined by p24 enzyme-linked immunosorbent assay (ELISA). PBMCs were infected by the lentivirus with 20 multiplicity of infection (MOI). After 14 days of cultivation, TCR-T cells recognizing the *KRAS* G12D neoantigen were acquired. DNA was extracted from the TCR-T cells by TIANamp Genomic DNA Kit (TIANGEN) following the protocol of the manufacturer. Sanger sequencing was used to determine the key sequence of the TCR. The sequence of primer was shown as SEQ ID NO. 1 in supplemental table 5. In supplemental figure 1C, the crimson part of the picture represented the matching sequence, and the arrow represented the sequencing direction. In addition, the expression of the TCR was detected by flow cytometry (FCM). The antibodies were PE anti-mouse TCR β chain Antibody (BioLegend), FITC Mouse Anti-Human CD8 (BD) and Cell Viability

Solution (BD).

It is challenging to identify the TCRs of T cells for newfound neoantigens. In general, we produced the specific tetramers to identify the neoantigen-specific T cells. In order to get the sequences of the TCRV $\alpha$  and the TCRV $\beta$  of the neoantigen-specific T cells, we need to sort the neoantigen-specific T cells for Sanger sequencing. Besides the TCR-T cells, antigen-specific T cells in peripheral blood and tumor infiltrating lymphocytes (TILs) of patients could be as effector cells in the Co-HA system.

## 5.2 Construction of the HLA vectors

The HLA vector was the main component of the Co-HA system that contained the HLA subtype linker region, the antigen linker region and the tag sequence. At first, the HLA-A\*11:01 vector containing HLA-A\*11:01 gene was constructed with the lenti-PURO-T2A-EGFP vector (supplemental figure 3A, supplemental plasmid sequence NO. 3). The steps of constructing the HLA-A\*11:01 vector were described in detail as follows. (1) To prevent disturbing subsequent restriction enzyme digestion, the recognition site of restriction enzyme BsmBI on the lenti-PURO-T2A-EGFP was synonymously mutated. (2) We simultaneously entrusted Synbio Technologies to synthesize the gene segment including HLA-A\*11:01, E2A, Tag-A\*11:01, P2A and *EGFP* we designed. The sequence of HLA-A\*11:01 was acquired from the IPD-IMGT/HLA database (<https://www.ebi.ac.uk/ipd/imgt/hla/>), and the recognition site of restriction enzyme BsmBI in HLA-A\*11:01 was synonymously mutated similarly. (3) The gene segment of *EGFP* was excised by restriction enzymes BamHI (NEB) and EcoRI (NEB), and the main part of the vector was recovered from the gel. Then, the synthesized gene segment was assembled into the main part of the vector by Gibson Assembly, and the HLA-A\*11:01 vector was constructed and named

lenti-PURO-T2A-(HLA-A\*11:01)-E2A-(Tag-A\*11:01)-P2A-EGFP (supplemental figure 3A, supplemental plasmid sequence NO. 4). (4) The 2611 bp gene segment was excised from the HLA-A\*11:01 vector by restriction enzymes BamHI (NEB) and XhoI (NEB) for verification (supplemental figure 3B). (5) Subsequently, the HLA-A\*11:01 vector, and assistant plasmid pVSVg (AddGene 8454) and psPAX2 (AddGene 12260) were cotransfected into HEK293T cells for producing lentivirus. The *EGFP* in vector was used to as reporter gene. Then, COS-7 cells were infected with the lentivirus and cultured with 4  $\mu$ g/ml puromycin (Sigma) for one week to establish stable cell lines. DNA was extracted from the COS-7 cells by TIANamp Genomic DNA Kit (TIANGEN) following the protocol of the manufacturer. The key sequence of the HLA-A\*11:01 vector was analyzed with Sanger sequencing. The sequences of primers were shown as SEQ ID NO. 2-3 in supplemental table 5. In supplemental figure 3C, the crimson parts of the picture represented the matching sequences sequenced by Sanger sequencing, and the arrows represented the sequencing directions. In addition, the expression of HLA-A\*11:01 was detected by FCM. The antibodies were FITC Mouse Anti-Human HLA-A (BD) and Cell Viability Solution (BD).

We designed the recognition sites of restriction enzymes BamHI (NEB) and AfeI (NEB) in the HLA-A\*11:01 vector to replace the gene segment of the HLA with its tag to construct various HLA vectors. Then, we provided an innovative scheme to design the tag sequences of various HLA vectors. The length of the tag sequences was 15 bp. In order to ensure each tag unique, tag sequence was derived from the corresponding part of the various HLA. In addition, the design of the tag sequences for HLA-A, HLA-B and HLA-C respectively were different and described below. The tag of HLA-A\* $\alpha$ : $\beta$  designed was derived from the first sequence at positions ( $\alpha \times 3 +$

1) to  $(\alpha \times 3 + 3)$  and the second sequence at positions  $(\beta \times 3 + 1)$  to  $(\beta \times 3 + 12)$  of HLA-A\* $\alpha$ : $\beta$  sequence; The tag of HLA-B\* $\alpha$ : $\beta$  designed was derived from the first sequence at positions  $(\alpha \times 3 + 1)$  to  $(\alpha \times 3 + 6)$  and the second sequence at positions  $(\beta \times 3 + 1)$  to  $(\beta \times 3 + 9)$  of HLA-B\* $\alpha$ : $\beta$  sequence; The tag of HLA-C\* $\alpha$ : $\beta$  designed was derived from the first sequence at positions  $(\alpha \times 3 + 1)$  to  $(\alpha \times 3 + 9)$  and the second sequence at positions  $(\beta \times 3 + 1)$  to  $(\beta \times 3 + 6)$  of HLA-C\* $\alpha$ : $\beta$  sequence. For instance, the tag of HLA-A\*11:01 was derived from the first sequence at positions 34  $(11 \times 3 + 1)$  to 36  $(11 \times 3 + 3)$  and the second sequence at positions 4  $(01 \times 3 + 1)$  to 15  $(01 \times 3 + 12)$  of the HLA-A\*11:01 sequence. Thirty-nine HLA vectors (supplemental table 1), including HLA-A\*24:02 and HLA-A\*02:01, were constructed for future use.

### 5.3 Construction of the target cells

We designed overlapping ends on both sides of the antigen linker region (supplemental table 2 SEQ ID NO. 3-4), and different gene segments of antigens can be seamlessly assembled to the HLA vectors at the same time with only one cutting and joining procedure. Specifically, we designed 2 recognition sites of restriction enzyme BsmBI on the HLA vectors for replacing the gene segment of *EGFP* with the gene segment of antigen, which can be used to construct the plasmid with coexpressing patient HLA and antigen.

We first entrusted Synbio Technologies to synthesize the gene segments of the *KRAS* G12D neoantigen (supplemental table 2 SEQ ID NO. 1) and its paired wild antigen (supplemental table 2 SEQ ID NO. 2). Then, we excised the gene segment of *EGFP* by restriction enzyme BsmBI (NEB) and recovered the HLA-A\*11:01 vector without *EGFP* from the gel (supplemental figure 4B). Gibson Assembly was performed to

assemble the gene segments of the *KRAS* G12D neoantigen and its paired wild antigen to the HLA-A\*11:01 vector without *EGFP* respectively. The target plasmids lenti-(HLA-A\*11:01)-*KRAS*-M and lenti-(HLA-A\*11:01)-*KRAS*-W were constructed (supplemental figure 4A, supplemental plasmid sequence NO. 5-6). The 3290 bp gene segments were excised from the target plasmids respectively by restriction enzymes EcoRI (NEB) and NotI (NEB) for verification (supplemental figure 4C). Subsequently, the target plasmids and assistant plasmid pVSVg (AddGene 8454) and psPAX2 (AddGene 12260) were cotransfected into HEK293T cells for producing lentivirus. Then, COS-7 cells were infected with the lentivirus and cultured with 4 µg/ml puromycin (Sigma) for one week to establish stable target cells. DNA was extracted from the target cells by TIANamp Genomic DNA Kit (TIANGEN) following the protocol of the manufacturer. Sanger sequencing was further performed to analyze the key sequence of the target plasmids. The sequence of primer was shown as SEQ ID NO. 3 in supplemental table 5. In supplemental figure 4D, the crimson parts of the picture represented the matching sequences sequenced by Sanger sequencing, and the arrows represented the sequencing directions.

#### 5.4 Validation and application of the Co-HA system

First, the expression of HLA-A\*11:01, HLA-A\*24:02, HLA-A\*02:01 molecules in the Co-HA system was validated by FCM. The antibodies used to detect the expression of HLA-A\*11:01 were FITC Mouse Anti-Human HLA-A (BD) and Cell Viability Solution (BD). The antibodies used to detect the expression of HLA-A\*24:02 were Anti-HLA-A24 (Human) mAb-FITC (MBL) and Cell Viability Solution (BD). The antibodies used to detect the expression of HLA-A\*02:01 were Mouse Anti-Human HLA-A2 (BD) and Cell Viability Solution (BD). Subsequently, we cocultured  $1 \times 10^5$  T cells (including  $1 \times 10^3$  CD8<sup>+</sup> TCR-T cells) and  $1 \times 10^4$  COS-7

cells for 3 days. The COS-7 cells had 3 types: WT COS-7 cells, COS-7 cells expressing the *KRAS* G12D neoantigen and COS-7 cells expressing its paired WT antigen. Then, the specific proliferation of CD8<sup>+</sup> TCR-T cells was detected by FCM. The antibodies were PE anti-mouse TCR  $\beta$  chain Antibody (BioLegend), FITC Mouse Anti-Human CD8 (BD) and Cell Viability Solution (BD). In addition, we performed a series of cytotoxicity tests to detect the immunogenicity of the *KRAS* G12D neoantigen in the Co-HA system. The effector cells ( $1 \times 10^5$  TCR-T cells) and the target cells ( $1 \times 10^4$  COS-7 cells) were cocultured for 12 hours. Then, the specific secretion of IFN- $\gamma$  by the TCR-T cells against the *KRAS* G12D neoantigen was detected by enzyme-linked immunospot assay (ELISPOT) and ELASA. The effector cells ( $1 \times 10^5$  TCR-T cells) and the target cells ( $1 \times 10^4$  COS-7 cells) were cocultured for 3 days. Then, the specific lysis of the COS-7 cells generated by the *KRAS* G12D neoantigen in the Co-HA system was detected by Sanger sequencing. The effector cells ( $1 \times 10^6$  TCR-T cells) and the target cells ( $1 \times 10^5$  COS-7 cells) were cocultured following the protocol of the CytoTox 96® Non-Radioactive Cytotoxicity Assay (Promega). Then, the specific cytotoxicity against COS-7 cells generated by the *KRAS* G12D neoantigen in the Co-HA system was detected by ELISA for LDH levels.

For verification of new HCC-dominant neoantigens by the Co-HA system, the effector cells were T cells amplified by potential neoantigens with PBMCs from peptides. Other steps were same as above.

## **6. Amplification of neoantigen-specific T cells in peripheral blood**

We produced the potential neoantigen peptides in GenScript and coincubated them with  $2 \times 10^6$  PBMCs/well to promote specific T-cell proliferation. They were cultured in X-VIVO 15 medium (Lonza) supplemented with 5% Human AB serum (GemCell),

100 U/ml penicillin (GIBCO), 100 µg/ml streptomycin (Gibco), and 10 IU/ml IL-2 (R&D) for 3 weeks. Medium was replenished twice a week and 4 µM/ml peptides were replenished weekly.

## 7. Tetramer staining

### 7.1 Generation of new specific tetramer using peptide exchange

New specific tetramers were generated by QuickSwitch Quant Tetramer Kit (MBL) following the protocol of peptide exchange experiments provided by the manufacturer. The predicted potential neoantigen peptides were loaded onto the tetramer at 2 mM according to standard procedure. The reference peptide was loaded onto the same tetramer at 1 mM.

### 7.2 Quantification of peptide exchange using flow cytometric sandwich immunoassay

All control samples were acquired following the protocol of the manufacturer. Then, the following procedure to quantify the peptide exchange efficiency was performed by flow cytometry (FCM): (1) 5 µl of Magnetic Capture Beads were pipetted to a flow cytometer tube containing 200 µl 1× Assay Buffer and run as a “beads” control; (2) Control #1 was bead-captured QuickSwitch Tetramer; (3) Control #2 was beads that have not captured any tetramer and stained with exiting peptide antibody, and control #3 (negative control) was beads that have captured the QuickSwitch Tetramer and stained with exiting peptide antibody. (4) Peptide exchange samples were run, the MFI<sub>FITC</sub> of each was noted. Peptide-exchanged tetramers displayed various Exiting Peptide amounts, which were inversely proportional to the newly loaded peptide on the HLA molecules. Control #4 was the reference peptide; (5) The percentages of peptide exchange of each peptide exchange samples were calculated. Tetramers bound to T-cell receptors via three HLA/peptide monomers<sup>[22-23]</sup>. Therefore, the minimal

recommended peptide exchange percentage should be 75%.

### 7.3 Detection of the neoantigen-specific T cells in peripheral blood by Tetramer staining

The cells tested were re-suspended at a concentration of  $2 \times 10^7$  cells/ml. 50  $\mu$ l of samples was prepared for tetramer staining. 10  $\mu$ l Clear Back (MBL), a human FcR blocking reagent for reducing nonspecific staining, was added to each tube. They were incubated for 5 min at room temperature. 10  $\mu$ l of tetramer was added and vortexed gently. They were protected from light and incubated for 30 min at room temperature. FITC Mouse Anti-Human CD8 (BD) was added and vortexed gently. They were protected from light and incubated for 20 min at 4 °C. PBS was used to rinse for 3 times. The cells were resuspended in 500  $\mu$ l of PBS with Cell Viability Solution (BD) and tested by FCM immediately.

## 8. Antitumor efficacy of *ENTPD6* neoantigen-specific T cells in vivo

The *ENTPD6* neoantigen-specific T cells from patient 04 were sorted by FCM after tetramer staining (supplemental figure 10A). The survival rate of the neoantigen-specific T cells sorted by FCM and cultivated in vitro (supplemental figure 10B). The Huh-7 cells coexpressing HLA-A\*24:02 and *ENTPD6* neoantigen were selected as the target cells (supplemental figure 9A), and then implanted into the B-NDG-*B2m<sup>tm1</sup>Fcrn<sup>tm1(mB2m)</sup>*/Bcgen mouse model. When tumor size was approximately  $150 \pm 50$  mm<sup>3</sup>, they were treated with the neoantigen-specific T cells ( $0.5 \times 10^6$ ) through intratumor injection every 2 days. In addition, the key sequences of the *ENTPD6* in tumors were detected by Sanger sequencing.

## 9. Quantification and statistical analysis

Statistical analyzes were conducted using GraphPad Prism 8.0.2 software. A 2-tailed *P*



value  $< 0.05$  was considered significant. The method for two group comparison is 2-tailed unpaired  $t$  test.

## SUPPLEMENTAL FIGURES

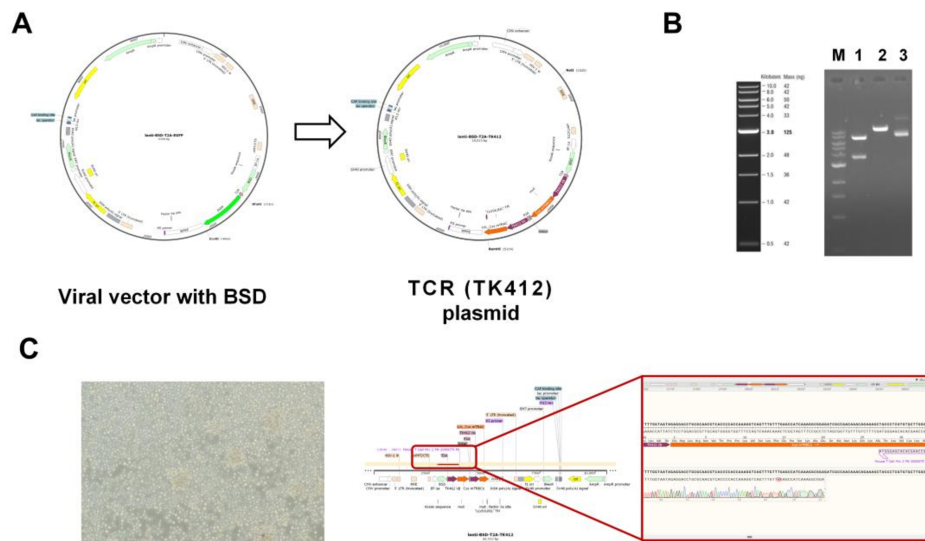

**Supplemental figure 1** The construction of the *KRAS* G12D TCR plasmid. (A) The map of the *KRAS* G12D TCR plasmid. (B) Validation of the *KRAS* G12D TCR plasmid by gel electrophoresis. Lane M shows the DNA marker, lane 1 shows the TCR plasmid digested by BamHI and NotI, lane 2 shows the TCR plasmid digested by BamHI, and lane 3 shows the TCR plasmid without digestion. (C) The established *KRAS* G12D TCR-T cells and the key sequence of the TCR-T cells analyzed with Sanger sequencing.

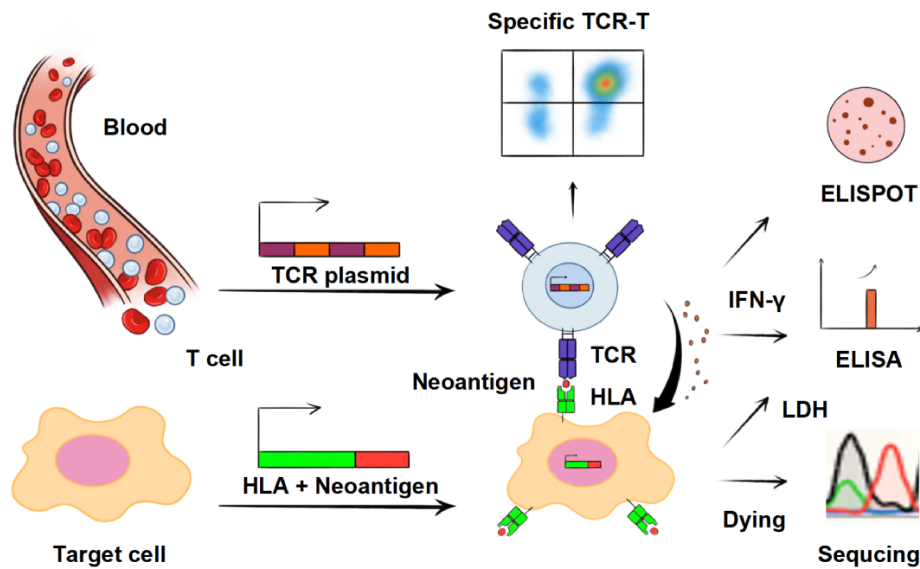

**Supplemental figure 2** Schematic for the establishment and validation of the Co-HA system by the *KRAS* G12D TCR-T cells. HLA, human leukocyte antigen; IFN- $\gamma$ , interferon- $\gamma$ ; LDH, lactate dehydrogenase; ELISPOT, enzyme-linked immunospot assay; ELISA, enzyme-linked immunosorbent assay.

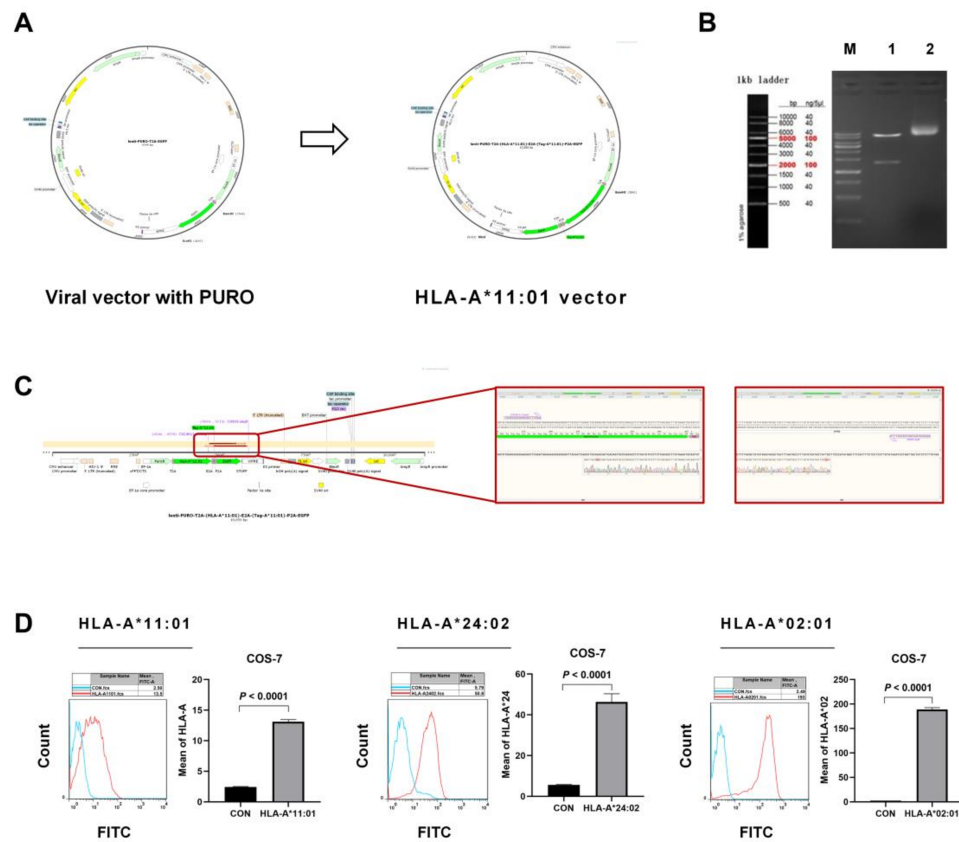

**Supplemental figure 3** The construction of the HLA vectors. (A) The map of the HLA-A\*11:01 vector. (B) Validation of the HLA-A\*11:01 vector by gel electrophoresis. Lane M shows the DNA Marker, lane 1 shows the HLA-A\*11:01 vector digested by BamHI and XhoI, and lane 2 shows the HLA-A\*11:01 vector without digestion. (C) The key sequence of the HLA-A\*11:01 vector analyzed with Sanger sequencing. (D) The expression of prevalent HLA molecules in the COS-7 cells constructed by the Co-HA system. HLA, human leukocyte antigen.

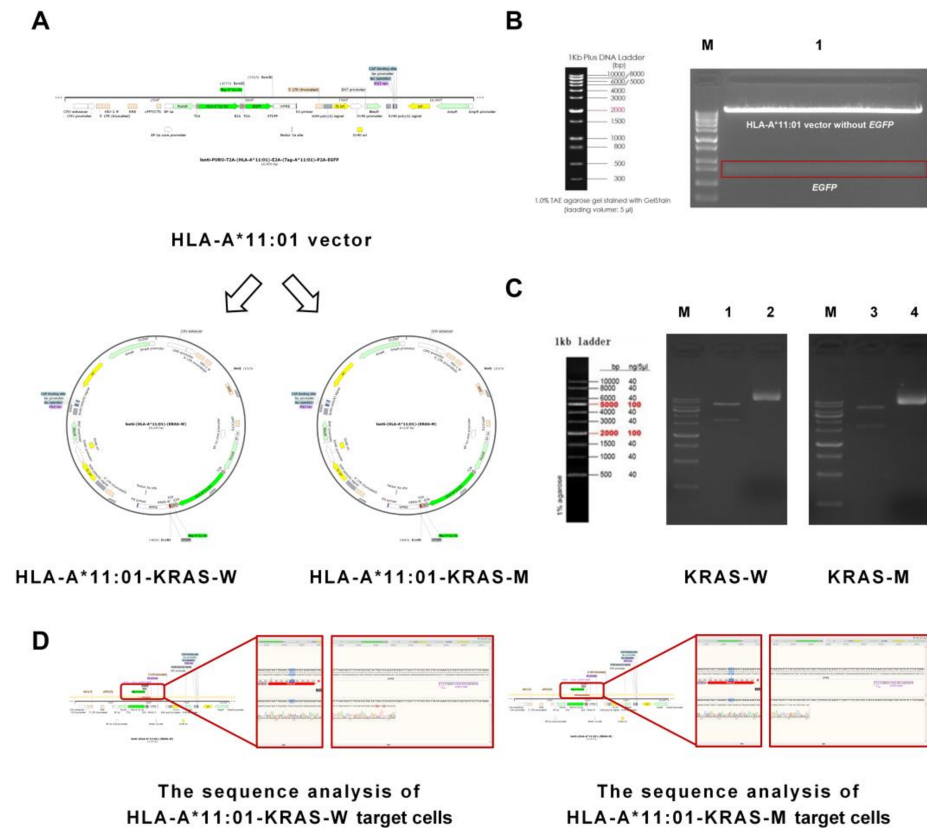

**Supplemental figure 4** The construction of target cells coexpressing HLA-A\*11:01 and antigens. (A) The maps of the target cell plasmids. (B) The construction of HLA\*11:01 vector without *EGFP*. To insert the gene segment of the antigen, the gene segment of *EGFP* in the vector was released from the vector by cleavage with the restriction enzyme BsmBI. Lane M shows the DNA Marker and lane 1 shows the HLA-A\*11:01 vector digested by BsmBI. (C) Validation of the target cell plasmids by gel electrophoresis. Lane M shows the DNA marker, lanes 1 and 3 show the target cell plasmids digested by EcoRI and NotI, and lanes 2 and 4 shows the target cell plasmids without digestion. (D) The key sequences of HLA-A\*11:01-KRAS-W or HLA-A\*11:01-KRAS-M in the COS-7 cells analyzed with Sanger sequencing. HLA, human leukocyte antigen.

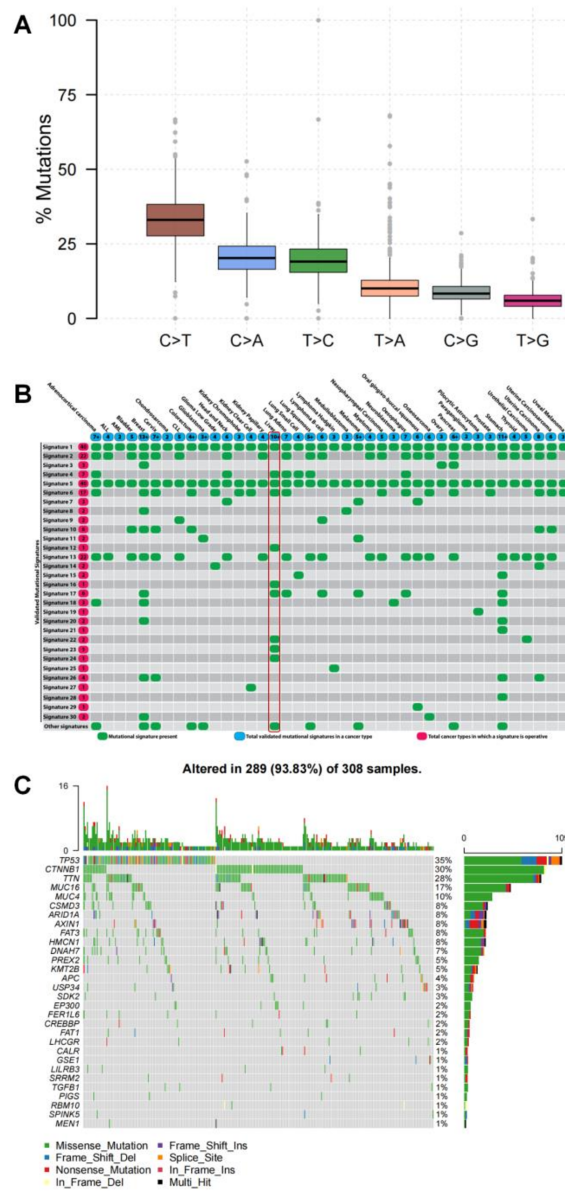

**Supplemental figure 5** The mutation spectrum of tumor tissues of HCC patients in databases. (A) The proportions of base substitution subtypes of the samples in TCGA-LIHC dataset. (B) Reference of mutational signatures of tumors in COSMIC database. (C) The key mutated genes and the TMB of the samples in TCGA-LIHC dataset. TCGA-LIHC, The Cancer Genome Atlas Liver Hepatocellular Carcinoma; COSMIC, Catalogue Of Somatic Mutations In Cancer.

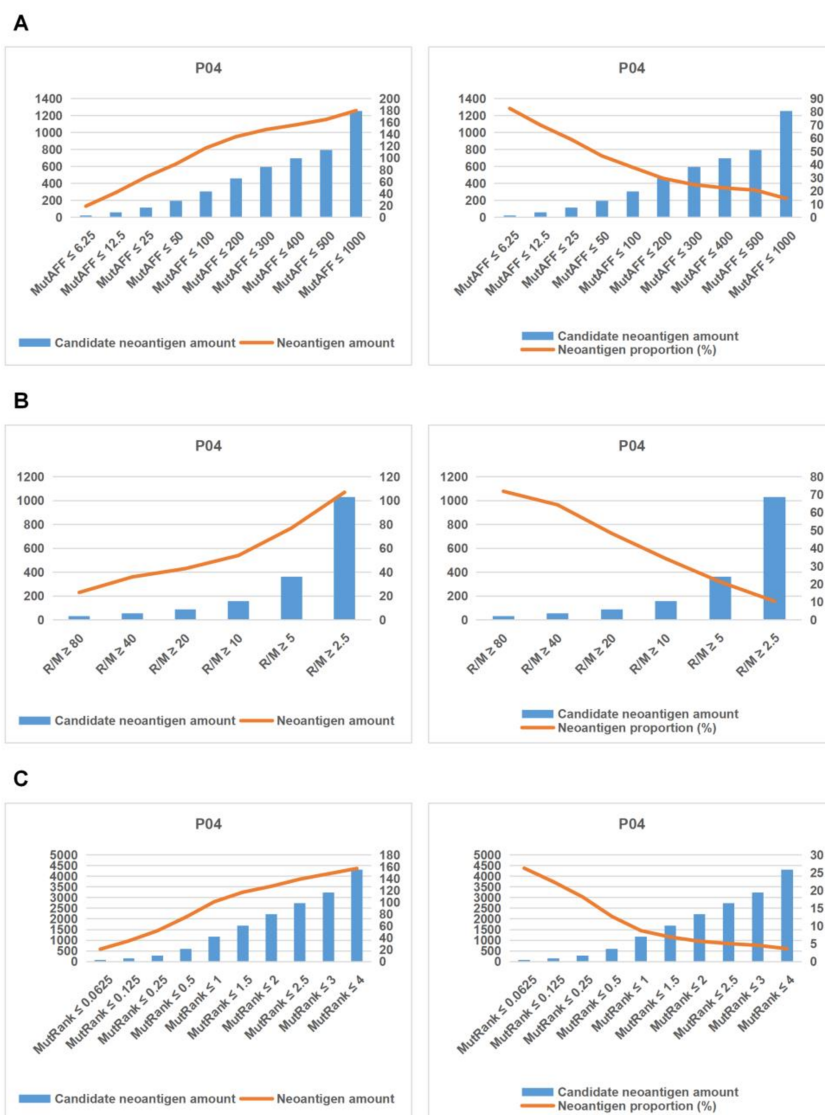

**Supplemental figure 6** The screening efficiency of neoantigens screened with different filter values of MutAFF, R/M and MutRank. (A) The candidate neoantigen amount, neoantigen amount and neoantigen proportion screened with different filter values of MutAFF (nM). (B) The candidate neoantigen amount, neoantigen amount and neoantigen proportion screened with different filter values of R/M. (C) The candidate neoantigen amount, neoantigen amount and neoantigen proportion screened with different filter values of MutRank (%). The candidate neoantigen amount is the amount of screened neoantigens. Neoantigen amount is the amount of screened real neoantigens. Neoantigen proportion is the proportion of real neoantigens in candidate neoantigens. MutAFF, mutated peptide affinity; R/M, referenced peptide affinity / mutated peptide affinity. MutRank, the rank of mutated peptide affinity.

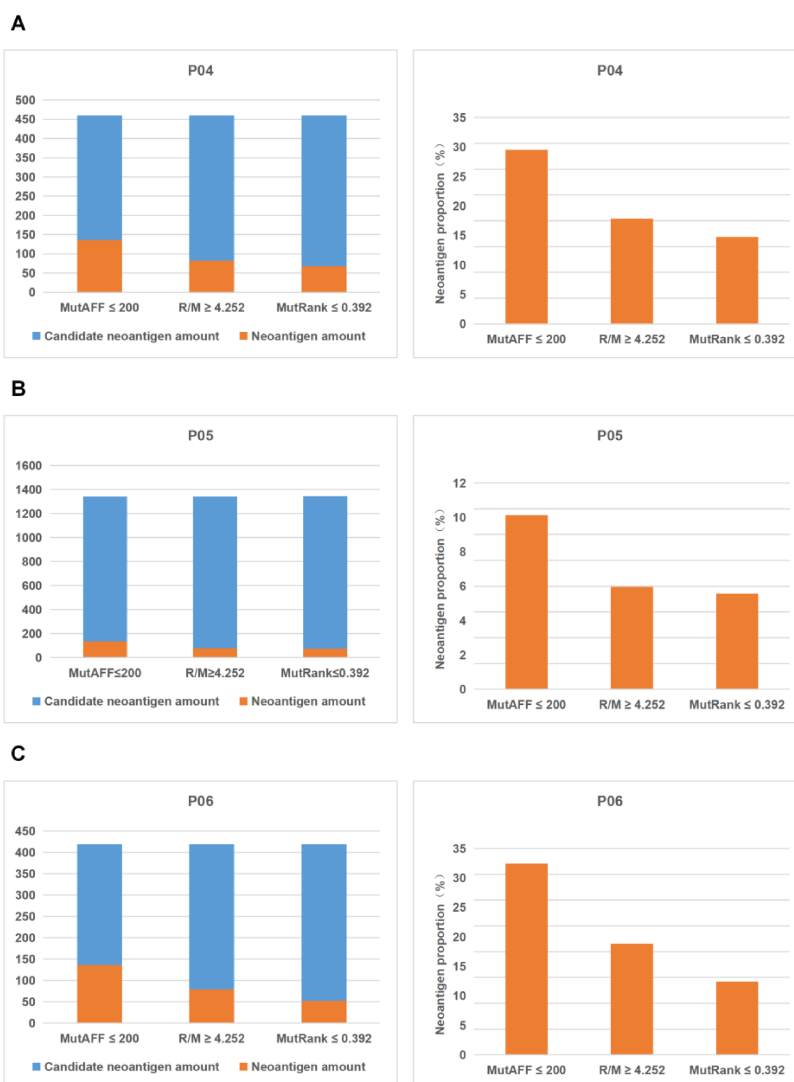

**Supplemental figure 7** The comparison of screening efficiency of neoantigens by MutAFF, R/M and MutRank. (A) The comparison of screening efficiency of neoantigens in Patient 04 by MutAFF, R/M and MutRank. (B) The comparison of screening efficiency of neoantigens in Patient 05 by MutAFF, R/M and MutRank. (C) The comparison of screening efficiency of neoantigens in Patient 06 by MutAFF, R/M and MutRank. The candidate neoantigen amount is the amount of screened neoantigens. Neoantigen amount is the amount of screened real neoantigens. Neoantigen proportion is the proportion of real neoantigens in candidate neoantigens. MutAFF, mutated peptide affinity; R/M, referenced peptide affinity / mutated peptide affinity. MutRank, the rank of mutated peptide affinity.

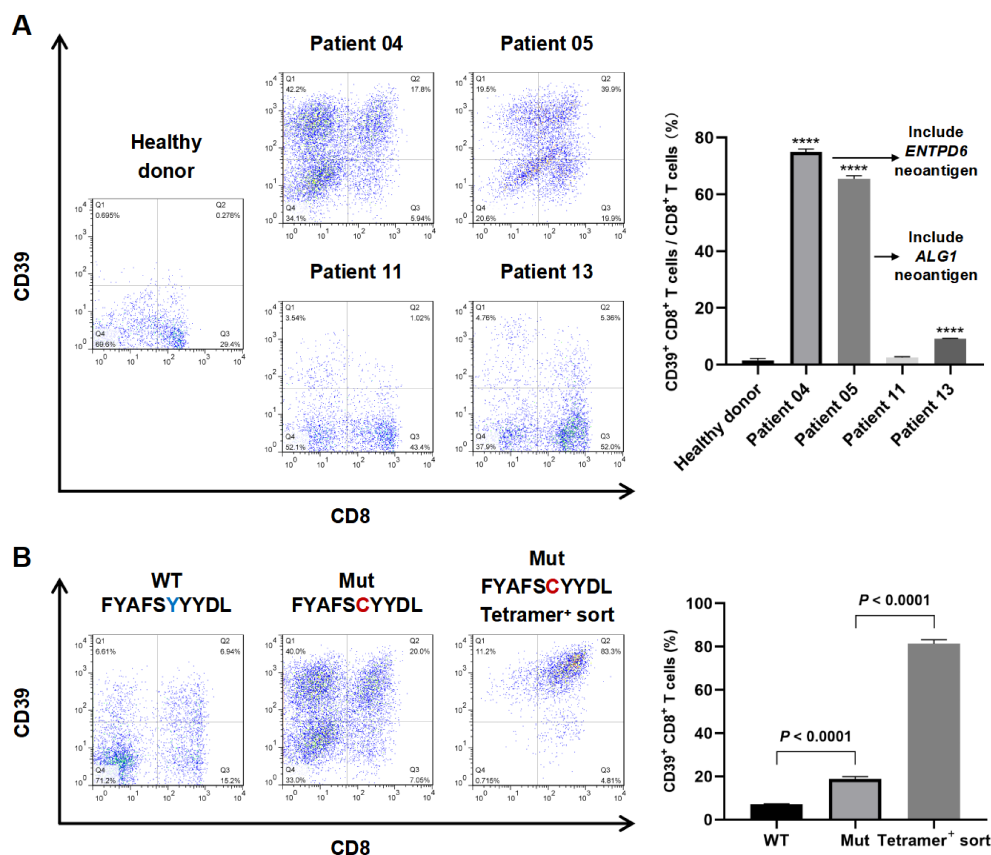

**Supplemental figure 8** The high frequency of CD39<sup>+</sup> CD8<sup>+</sup> T cells in HCC patients with dominant neoantigens. (A) The frequency of CD39<sup>+</sup> CD8<sup>+</sup> T cells after stimulation with predicted neoantigen peptides in HCC patients. (B) The frequency of CD39<sup>+</sup> CD8<sup>+</sup> T cells in patient 04 induced by *ENTPD6* neoantigen peptides or its paired WT peptide. The high frequency of CD39<sup>+</sup> CD8<sup>+</sup> T cells in the tetramer<sup>+</sup> *ENTPD6* neoantigen-specific T cells sorted by FCM. FCM, flow cytometry.



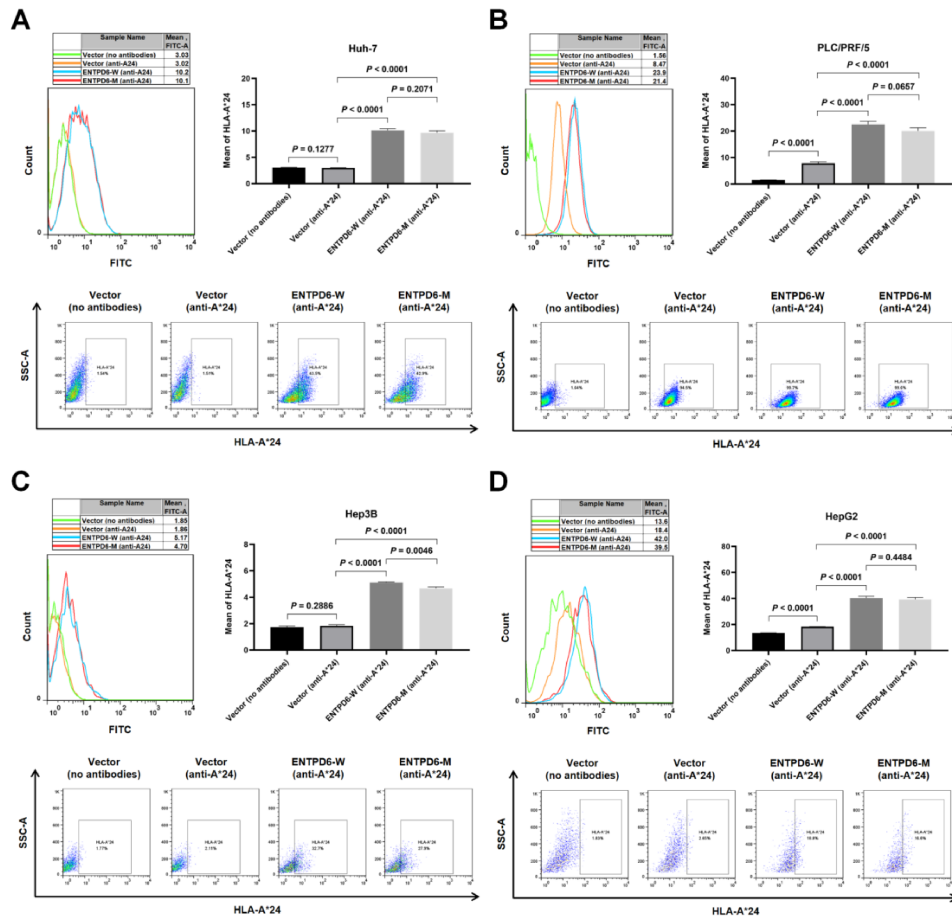

**Supplemental figure 9** The construction of target cells in HCC cell lines coexpressing HLA-A\*24:02 and *ENTPD6* neoantigen. (A) The expression of HLA-A\*24:02 on Huh-7 cells. (B) The expression of HLA-A\*24:02 on PLC/PRF/5 cells. (C) The expression of HLA-A\*24:02 on Hep3B cells. (D) The expression of HLA-A\*24:02 on HepG2 cells. HLA, human leukocyte antigen.

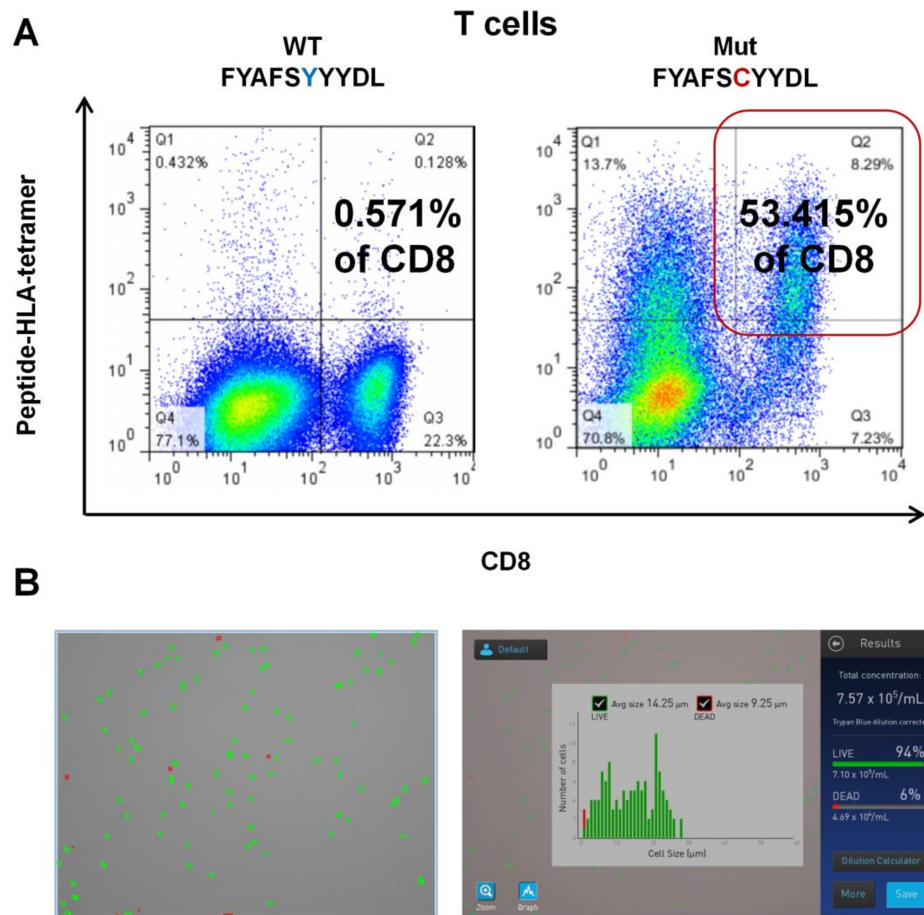

**Supplemental figure 10** The *ENTPD6* neoantigen-specific T cells from patient 04. (A) Tetramer staining of PBMCs from patient 04 after stimulation with the *ENTPD6* neoantigens and paired WT peptides. (B) The survival rate of the *ENTPD6* neoantigen-specific T cells acquired by FCM and cultivated in vitro. PBMCs, peripheral blood mononuclear cells; FCM, flow cytometry.

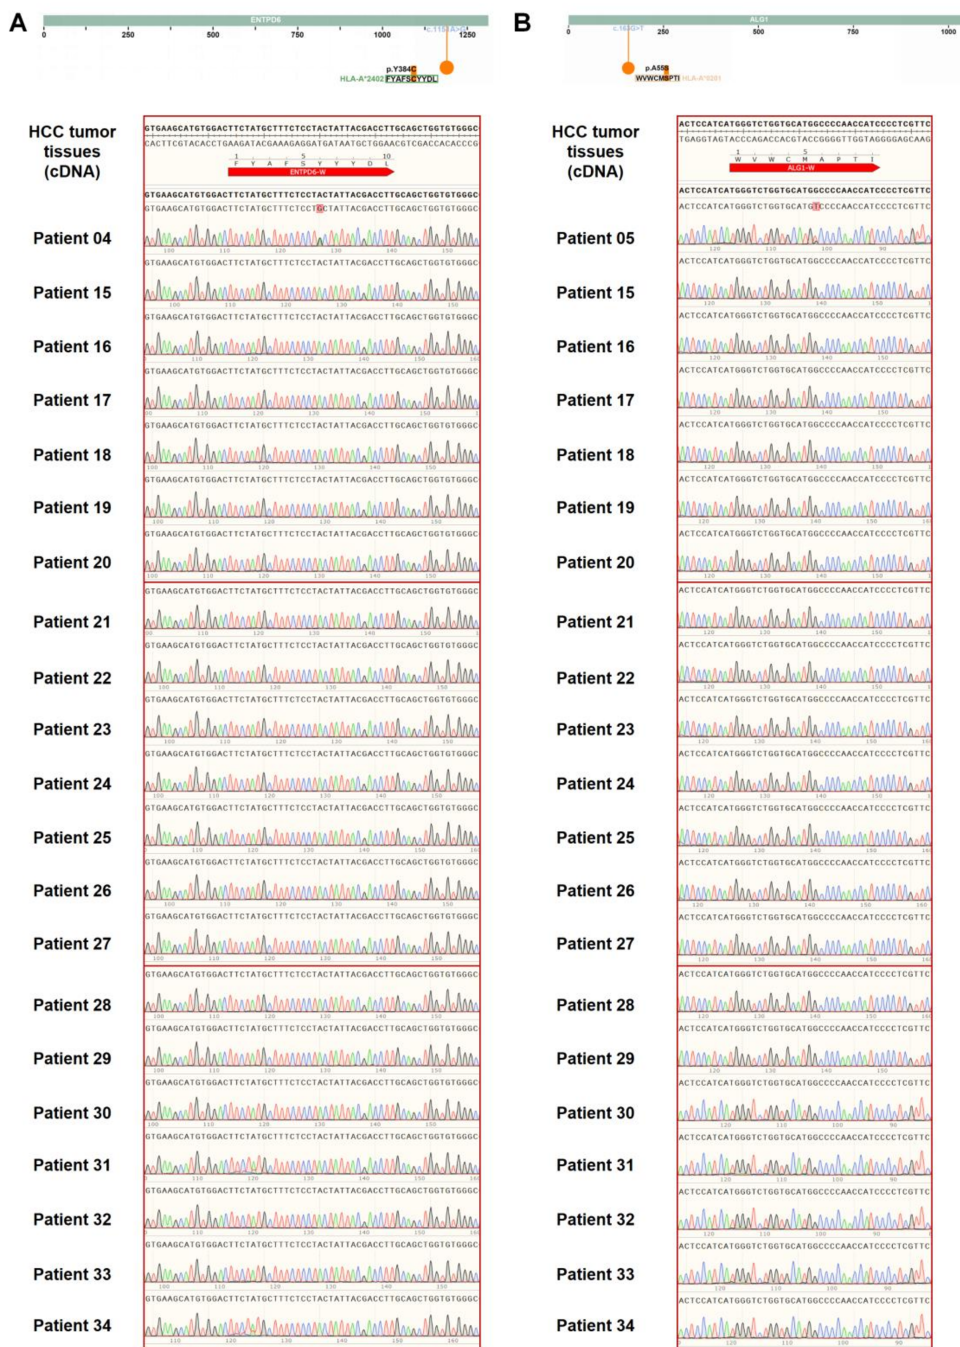

**Supplemental figure 11** The frequency of the new HCC-dominant neoantigens in our HCC cohort. (A) The frequency of the neoantigen 5'-FYAFSCYYDL-3' in our HCC cohort determined by Sanger sequencing. (B) The frequency of the neoantigen 5'-WVWCMSPTI-3' in our HCC cohort determined by Sanger sequencing. HLA, human leukocyte antigen.

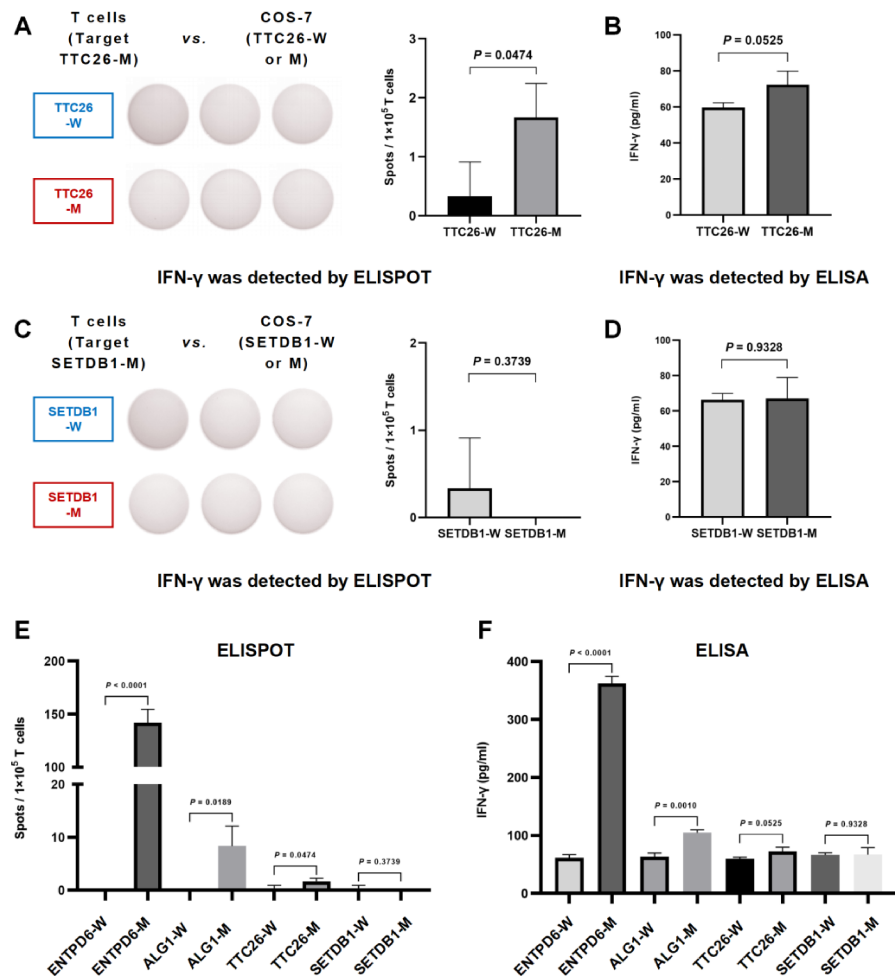

**Supplemental figure 12** Two predicted potential neoantigens are nondominant neoantigens verified in the Co-HA system. (A) The secretion of IFN- $\gamma$  by T cells from PBMCs of patient 05 against the *TTC26* mutated antigen and the paired WT antigen in the Co-HA system detected by ELISPOT. (B) The secretion of IFN- $\gamma$  by T cells from PBMCs of patient 05 against the *TTC26* mutated antigen and the paired WT antigen in the Co-HA system detected by ELISA. (C) The secretion of IFN- $\gamma$  by T cells from PBMCs of patient 05 against the *SETDB1* mutated antigen and the paired WT antigen in the Co-HA system detected by ELISPOT. (D) The secretion of IFN- $\gamma$  by T cells from PBMCs of patient 05 against the *SETDB1* mutated antigen and the paired WT antigen in the Co-HA system detected by ELISA. (E) The comparison between the dominant neoantigens and nondominant neoantigens detected by ELISPOT in the Co-HA system. (F) The comparison between the dominant neoantigens and nondominant neoantigens detected by ELISA in the Co-HA system. PBMCs, peripheral blood mononuclear cells; ELISPOT, enzyme-linked immunospot assay; ELISA, enzyme-linked immunosorbent assay; IFN- $\gamma$ , Interferon gamma.

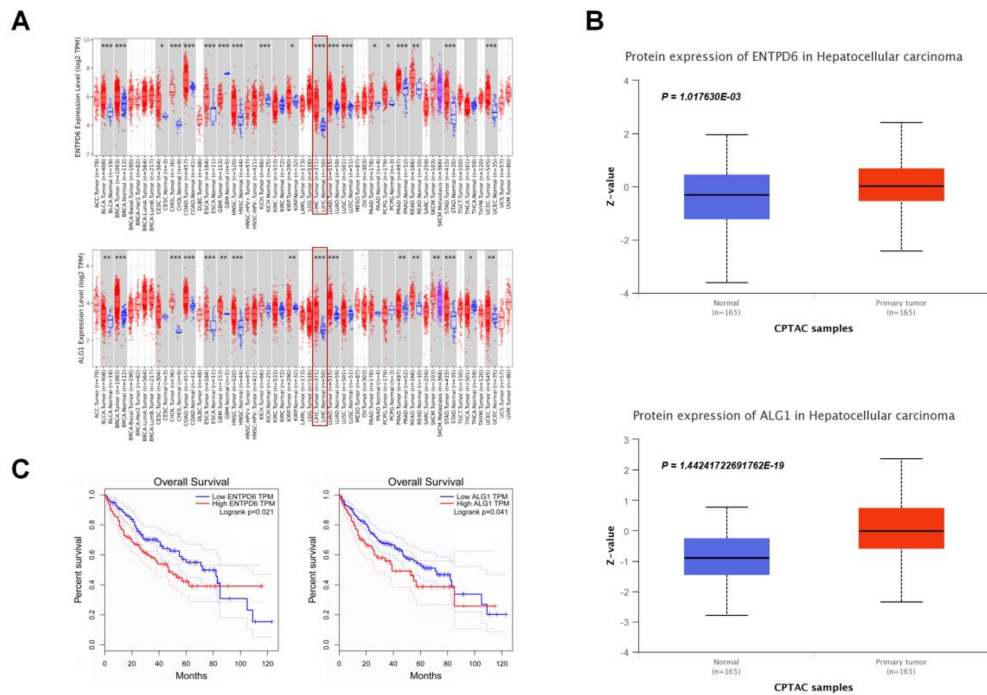

**Supplemental figure 13** The expression level and the clinical correlation analysis of *ENTPD6* and *ALG1*. (A) The differential expression between tumor and adjacent normal tissues for *ENTPD6* and *ALG1* in various cancers of TCGA database. Distributions of gene expression levels are displayed using box plots. The statistical significance computed by the Wilcoxon test is annotated by the number of stars ( $P < 0.05$ ;  $**P < 0.01$ ;  $***P < 0.001$ ). (B) The expression of *ENTPD6* and *ALG1* in the CPTAC-LIHC dataset. (C) Overall survival analysis of HCC patients with high and low expression levels of *ENTPD6* or *ALG1* in TCGA-LIHC dataset. TCGA, The Cancer Genome Atlas; LIHC, Liver Hepatocellular Carcinoma; CPTAC, Clinical Proteomic Tumor Analysis Consortium.

## SUPPLEMENTAL TABLES

Supplemental table 1 Summary of constructed HLA vectors

| HLA-A   |         | HLA-B   |         | HLA-C   |         |
|---------|---------|---------|---------|---------|---------|
| A*11:01 | A*03:01 | B*40:01 | B*27:01 | C*01:02 | C*15:02 |
| A*24:02 | A*32:01 | B*15:01 | B*55:01 | C*07:02 | C*03:03 |
| A*02:01 | A*02:06 | B*46:01 | B*39:01 | C*03:04 | C*07:04 |
| A*33:01 |         | B*13:01 | B*38:01 | C*08:01 | C*08:01 |
| A*30:01 |         | B*51:01 | B*52:01 | C*04:01 |         |
| A*31:01 |         | B*58:01 | B*44:02 | C*14:02 |         |
| A*26:01 |         | B*35:01 | B*15:18 | C*06:02 |         |
| A*01:01 |         | B*54:01 | B*67:01 | C*12:02 |         |

Supplemental table 2 Sequence list of antigens and overlaps

| SEQ ID | Name      | Sequence                    |
|--------|-----------|-----------------------------|
| NO. 1  | KRAS-M    | GTAGTTGGAGCTGATGGCGTAGGCAAG |
| NO. 2  | KRAS-W    | GTAGTTGGAGCTGGTGGCGTAGGCAAG |
| NO. 3  | Overlap-1 | GATGTCGAAGAGAATCCTGGACCG    |
| NO. 4  | Overlap-2 | TAGCCTAAGAATTCGATATCAAGC    |

**Supplemental table 3 The characteristics of 37 paired mutated and WT peptides restricted by HLA-A\*24:02, HLA-A\*02:01 or HLA-A\*11:01**

| Patient | Gene             | Mut | HLA        | MutPeptide  | MutAFF (nM) | MutRank | RefPeptide  | RefAFF (nM) | RefRank |
|---------|------------------|-----|------------|-------------|-------------|---------|-------------|-------------|---------|
| 04      | <i>ENTPD6</i>    | Y/C | HLA-A24:02 | FYAFSCYYDL  | 82.16       | 1.957   | FYAFSYYDL   | 51.58       | 1.101   |
| 04      | <i>VPS13D</i>    | Y/F | HLA-A24:02 | RFIDTCMVIF  | 52.99       | 0.33    | RYIDTCMVIF  | 9.54        | 0.048   |
| 04      | <i>VPS13D</i>    | Y/F | HLA-A24:02 | RFIDTCMVI   | 124.72      | 0.752   | RYIDTCMVI   | 13.08       | 0.144   |
| 05      | <i>CTNNB1</i>    | D/H | HLA-A02:01 | YLHSGIHSGA  | 93.29       | 0.397   | YLDSGIHSGA  | 55.69       | 0.215   |
| 05      | <i>SEPT1</i>     | N/S | HLA-A02:01 | FLSLRRMLV   | 63.97       | 1.192   | FLNLRRLV    | 69.82       | 1.119   |
| 05      | <i>HEATR6</i>    | I/M | HLA-A02:01 | MLMSLEDKSL  | 56.44       | 1.958   | ILMSLEDKSL  | 124.57      | 1.457   |
| 05      | <i>ALG1</i>      | G/V | HLA-A02:01 | YSIMGLVHV   | 102.37      | 1.064   | YSIMGLVHG   | 17767.11    | 36.417  |
| 05      | <i>ALG1</i>      | A/S | HLA-A02:01 | WVWCMSPTI   | 41.2        | 3.375   | WVWCMAPTI   | 72.26       | 4.695   |
| 05      | <i>TTC26</i>     | G/A | HLA-A02:01 | KMAQFYISA   | 11.98       | 0.602   | KMGQFYISA   | 35.01       | 1.321   |
| 05      | <i>SETDB1</i>    | L/I | HLA-A02:01 | KQIAELETWV  | 113.57      | 1.531   | KQLAELETWV  | 30.33       | 0.661   |
| 11      | <i>TMEM176B</i>  | R/T | HLA-A11:01 | CTAYMQMLR   | 41.27       | 0.948   | CRAYMQMLR   | 11832.89    | 12.191  |
| 11      | <i>TMEM176B</i>  | R/T | HLA-A11:01 | CTAYMQMLRK  | 22.17       | 1.604   | CRAYMQMLRK  | 277.17      | 3.489   |
| 11      | <i>HNRNPA2B1</i> | D/G | HLA-A11:01 | GPVDKIVLQK  | 172.23      | 0.31    | DPVDKIVLQK  | 3224.26     | 2.437   |
| 11      | <i>PPFIBP2</i>   | I/K | HLA-A11:01 | KLGFSHFGNK  | 83.75       | 1.52    | KLGFSHFGNI  | 19571.99    | 33      |
| 11      | <i>TMEM176B</i>  | R/T | HLA-A11:01 | TAYMQMLRK   | 16.58       | 0.123   | RAYMQMLRK   | 16.33       | 0.084   |
| 11      | <i>HNRNPA2B1</i> | D/G | HLA-A11:01 | VTFDDHGPVVK | 104.23      | 0.17    | VTFDDHDPVVK | 270.42      | 0.499   |
| 11      | <i>TUBG1</i>     | Q/R | HLA-A11:01 | ASIRVALSR   | 40.43       | 0.13    | ASIQVALSR   | 73.17       | 0.112   |
| 11      | <i>TUBG1</i>     | Q/R | HLA-A11:01 | ASIRVALSRK  | 17.27       | 0.239   | ASIQVALSRK  | 20.52       | 0.104   |
| 11      | <i>TUBG1</i>     | Q/R | HLA-A11:01 | SIRVALSRK   | 189.1       | 0.884   | SIQVALSRK   | 25.38       | 0.151   |
| 11      | <i>OSER1</i>     | S/C | HLA-A11:01 | ASSSSQLK    | 24.82       | 0.153   | ASSSSQLK    | 18.86       | 0.038   |
| 11      | <i>OSER1</i>     | S/C | HLA-A11:01 | TIASSSSQLK  | 108.54      | 0.447   | TIASSSSQLK  | 112.17      | 0.403   |
| 11      | <i>OSER1</i>     | S/C | HLA-A11:01 | SSSSQLKHK   | 33.3        | 0.457   | SSSSQLKHK   | 45.62       | 0.149   |
| 11      | <i>OSER1</i>     | S/C | HLA-A11:01 | SSSSQLKHK   | 143.13      | 0.714   | SSSSQLKHK   | 89.38       | 0.141   |
| 11      | <i>OSER1</i>     | S/C | HLA-A11:01 | IASSSSQLK   | 110.36      | 1.358   | IASSSSQLK   | 104.67      | 0.826   |
| 13      | <i>FNDC3A</i>    | A/S | HLA-A11:01 | LSYSIDFGDK  | 66.69       | 1.466   | LAYSIDFGDK  | 189.17      | 2.481   |
| 13      | <i>CKAP4</i>     | R/S | HLA-A11:01 | ASCSRSLGR   | 186.71      | 0.734   | ASCRRLGR    | 569.46      | 1.475   |
| 13      | <i>SLC25A15</i>  | L/V | HLA-A11:01 | VSTVWSVIK   | 83.89       | 0.777   | LSTVWSVIK   | 123.35      | 1.287   |
| 13      | <i>SLC25A15</i>  | L/V | HLA-A11:01 | KVSTVWSVIK  | 25.33       | 0.281   | KLSTVWSVIK  | 71.25       | 1.013   |
| 13      | <i>GART</i>      | V/F | HLA-A11:01 | VTEAVFAGIAK | 188.37      | 1.08    | VTEAVVAGIAK | 317.35      | 1.118   |
| 13      | <i>SDS</i>       | H/Y | HLA-A11:01 | MSGEPLYVK   | 43.76       | 0.162   | MSGEPLHVK   | 67.56       | 0.143   |
| 13      | <i>SDS</i>       | H/Y | HLA-A11:01 | MMSGEPLYVK  | 29          | 0.807   | MMSGEPLHVK  | 76.73       | 0.694   |
| 13      | <i>SDS</i>       | H/Y | HLA-A11:01 | GMSGEPLYVK  | 73.27       | 0.823   | GMSGEPLHVK  | 106.22      | 0.572   |
| 13      | <i>EP400</i>     | P/R | HLA-A11:01 | KTDPSAAGRK  | 172.96      | 0.704   | KTDPSAAGRK  | 84.51       | 0.154   |
| 13      | <i>AK3</i>       | G/V | HLA-A11:01 | ETFSVTETNK  | 198.61      | 0.543   | ETFSGTETNK  | 226.36      | 0.383   |
| 13      | <i>TMEM219</i>   | R/H | HLA-A11:01 | TAMCFPHR    | 183.81      | 2.211   | TAMCFPRR    | 223.43      | 2.507   |
| 13      | <i>TMEM219</i>   | R/H | HLA-A11:01 | VTAMCFPHR   | 132.99      | 2.72    | VTAMCFPRR   | 161.63      | 3.042   |
| 13      | <i>DAB2IP</i>    | I/V | HLA-A11:01 | IVNSYCVFPR  | 97.83       | 3.095   | IINSYCVFPR  | 199.66      | 4.497   |

Mut, mutation; MutAFF, mutated peptide affinity; MutRank, the rank of mutated peptide affinity. RefAFF, referenced (WT) peptide affinity; RefRank, the rank of referenced (WT) peptide affinity.

Supplemental table 4 The sequence of potential *ENTPD6* specific TCRs

|            | TCR Vα                                                                                                                                                                                                                                                                                                                                                                                                                                                                                                                                                                                                                                                                                                                                                                                                                                                                                                                                                                                                                                                                                                                                                                                                                                                                                                                                                                                                                                                                                                                                                                                                                                                                                                                                                                                                                                                                                                                                                                                                                                                                                                                                                                                                                                                                                                                                                                                                                                                                                                                                                                                                                                                                                                                                                                                                                                                                                                                  | TCR Vβ                                                                                                                                                                                                                                                                                                                                                                                                                                                                                                                                                                                                                                                                                                                                                                                                                                                                                                                                                     |
|------------|-------------------------------------------------------------------------------------------------------------------------------------------------------------------------------------------------------------------------------------------------------------------------------------------------------------------------------------------------------------------------------------------------------------------------------------------------------------------------------------------------------------------------------------------------------------------------------------------------------------------------------------------------------------------------------------------------------------------------------------------------------------------------------------------------------------------------------------------------------------------------------------------------------------------------------------------------------------------------------------------------------------------------------------------------------------------------------------------------------------------------------------------------------------------------------------------------------------------------------------------------------------------------------------------------------------------------------------------------------------------------------------------------------------------------------------------------------------------------------------------------------------------------------------------------------------------------------------------------------------------------------------------------------------------------------------------------------------------------------------------------------------------------------------------------------------------------------------------------------------------------------------------------------------------------------------------------------------------------------------------------------------------------------------------------------------------------------------------------------------------------------------------------------------------------------------------------------------------------------------------------------------------------------------------------------------------------------------------------------------------------------------------------------------------------------------------------------------------------------------------------------------------------------------------------------------------------------------------------------------------------------------------------------------------------------------------------------------------------------------------------------------------------------------------------------------------------------------------------------------------------------------------------------------------------|------------------------------------------------------------------------------------------------------------------------------------------------------------------------------------------------------------------------------------------------------------------------------------------------------------------------------------------------------------------------------------------------------------------------------------------------------------------------------------------------------------------------------------------------------------------------------------------------------------------------------------------------------------------------------------------------------------------------------------------------------------------------------------------------------------------------------------------------------------------------------------------------------------------------------------------------------------|
| S5-1-BA1   | ATGACACGAGTTAGCTTGTCAAGGTGGTCCACAGCTTCACTGTGG<br>CTAGGACCTGGCAATTCGCCAGAAGTAACCTAAACCCAAACAGGA<br>ATGTTCTGTGCAGAAAAGGAGGTGTGACTCTGGACTGCACATAT<br>GACCACAGTATCCAAGTTATGGTCTATCTGTGACAAAGCAGCCC<br>AGCAGTGGGAAATGATTTTCTTATTTATCAGGGGTCTTATGACC<br>AGCAAATGCAACAGAAAGTCTGCTACTCATTTGAATTCACAGAAGG<br>CAAGAAATCGCCAACTTGTCAITCTCCCTTCACAACTGGGGG<br>ACTCACCAATCTACTTCTCTCAATGGAGAGATGGAACTGGTA<br>ACCAGTCTATTTGGGACAGGGCAAGTTTGGCGGTCAATCCAA<br>AT<br>ATGGAGACCCTCTTGGGGCTGCTATCCTTTGGCTGCAGCTCAAT<br>GGGTGAGCAGAAACAGGAGGTGACACAGATTCTGGAGCTCTGA<br>GTGTCGCCAGAAGGAGAAATCTGGTTCCTAACTGCAGTTTCACTG<br>ATAGCGCTATTACAACTCCAGTGGTTAGCGAGGACCCCTGGGA<br>AGCGTCTGACACTCTGCTTCTATTCCTCAAGTCACTCCAGAGC<br>AAACAAGTGGAAAGCTTAAAGCTCGCTGGATAAATCATCAGGAC<br>GTAGTACTTTATACATTCAGCTCTCAGCCTGGTGACTACGCCAC<br>CTACCTCTGTGCTGTGAACAGGCAAGTCTGTCTGATCTTTGGG<br>AAGGGAACCCTTATCAGTGAAGTCCAAAT<br>ATGGTCTGAAATCTCCGTGTCCATTCTTTGGATTGAGTTGGCAT<br>GGGTGGAGCCAGCTGCTGGAGCAGGACCCCTAGTTTCTAAGCA<br>TCCAAAGGAGGAGAAATCTCACTGTGCTACTGCAACTCTCAAGT<br>TTTITTCCAGCTTACAAGTGTACAGACAGGAGCCCTGGGGAAGTTC<br>CTGTCTCTGTGGACAGTGTACGGGTGGAGAAAGTGAAGAAGC<br>TGAAGAGACTAACCTTTCAGTTTGGTGTACAGAAAGGACAGT<br>CTCTCCACATCACTCGGGCCAGCCTGGTATACAGGCCCTCTACCT<br>CTGTCCAGCGTGTACTGTGGTGTACTAGCTATGGAAAGCT<br>GACATTITGGCAAGGAGCAATCTTACTGTTCCTCAAT<br>GGTGGAGCCAGCTGCTGGAGCAGGAGCCCTAGTTTCTAAGCA<br>TCCAAAGGAGGAGAAATCTCACTGTGACTGCAACTCTCAAGT<br>TTTITTCCAGCTTACAAGTGTACAGACAGGAGCCCTGGGGAAGTTC<br>CTGTCTCTGTGGACAGTGTACGGGTGGAGAAAGTGAAGAAGC<br>TGAAGAGACTAACCTTTCAGTTTGGTGTACAGAAAGGACAGT<br>CTCTCCACATCACTCGGGCCAGCCTGGTATACAGGCCCTCTACCT<br>GACTTITGGCAAGGAGCAATCTTACTGTTCCTCAAT<br>ATGAAGACATTTGTGGATTTCTGTCTGTTTITGGGTGTGAGC<br>TGGACTGTATGAGTAGAGGAGGAGGTGTGAGGACGAGTCTTTCC<br>TGAGTGTCCGAGAGGAGACAGCTCCGTTATAAAGTCACTTACA<br>CAGACAGCTCTCCACCTACTTACTGGTATAAGCAAGAACTGT<br>GAGCAGGTCTCCAGTGTGAGCTATATTTTCAAATATGGACAT<br>GAAACAAGACAAAGACTACTGTCTATTGAATAAAAGGATAA<br>ACATCTCTCTCCGATTTGACAGCAGCAGACTGGGACTCAGC<br>TATCTACTTCTGTCCAGAGAGAGGAGACTGGAGGCTTCAAACAT<br>CTTTGGAGCAGGAACAAGACTATTGTTAAAGCAAAAT<br>ATGGAGAAAATGTTGGAGTGTGCATTCATAGTCTTGGCTCAGC<br>TTGGCTGGTGTGAGTGGAGAAGACCAGTGTACGAGAGTCCCGAGG<br>CCCTGAGACTCCAGGAGGAGAGAGTACAGTCTCAACTGCAGT<br>ACACAGTACGCGTTTAAAGAGGCTGTTCTGTGATAGGCAAGATC<br>CTGGAAAGGCTGTGATTTCTCTCAGCTGTATCACTGGTGGGA<br>AGAAAAGGAGAAAGAAAGGCTAAAGCCACATTAAACAAGAAGG<br>AAAGCTTCTGCACATCACAGCCCTAAACCTGAAGACTCAGCCA<br>CTTATCTGTGCTGTGCAAGGCTCAGCGGAGGAGGAAACAAC<br>TCACTTTGGGACAGGCACTCAGCTAAAGTGGAACTCAAT<br>ATGAGGCTGGTGGCAAGAGTAAGTGTGTTCTGACCTTTGGAACT<br>ATAATTGATGCTAAGCAACCAGCCACTCCATGATTTGGCTT<br>GAAGGAAGAGCTGTGATTTCTCTCAGCTGTATCACTGGATCAGT<br>GGAATGAGTATGTTATGGTATCAGACAGATTCACCTCCAGGGG<br>CCACAGTATATCATTTGTTTAAAACAAGTAAAACAATGAA<br>ATGGCTCTCTGATCATCAGAAAGACAGAAAGTCCAGCACTTG<br>ATCCTGCCCCAGCTACGCTGAGAGACTGTCTGTACTATTGCA<br>TCGACCTGGATGCCAGACTATGTTGGAGATGGAACCTAGCTGG<br>TGGTGAAGCCCAAT | ATGGCCCCGGGCTCTTGCTGTGTGGTCTTGGCTTTAGGAG<br>CAGGCCCTGGAAAGCCAAAGTGAACCCAGAACCAGGATACCTCA<br>TCACAGTGAAGGAAAGTAAAGTAACTGACTGTCTTCTCAGAATAT<br>GAACATGAGTATATGCTTGGTATCGACAAGCCAGGGCTGGG<br>CTTAAAGCAGATCTACTATTCATGAAATGTGGAGTGAAGTAAAG<br>GGAGATGTCTTGAAGGGTACAAGTCTCTCGAAAGAGAGAAGAG<br>AATTTCCCTGTGCTGGAGTGGCCAGGCCAAACAGACTCTC<br>TGTCTCTGTGGCAGCAGTGAAGTAAAGGAGTCCAGATACAGATACGGA<br>GTATTTTGGCCCAGGCCCGGTGACAGTGTCT                                                                                                                                                                                                                                                                                                                                                                                                                                                                                                                                   |
| SP10-2-BA6 | ATGGATATCTGGCTCTCTGCTGTGGCCCTTTGTCTCTGGGAGC<br>AGGCCAGTGGATTCTGGAGTCAACAACCCCAAAAGCAGCTGAT<br>CACAGCACTGGACAGCGGATGACGCTAGATGCTCCCTAGTCT<br>TGGAGACTCTGTGTACTGTTACCAACAGAGACTTGGACAGCGGC<br>CTGAGTATGACAATAAGAAAGTCTTGAATGAGGAGCAACATAT<br>GGGACAGAGGCTATGTATGTTACAAGCAGAAAGCTTAAGAAGCC<br>ACCGAGCTCATGTITGTCTACAGCTATGAGAACTCTATAAAT<br>GAAAGTGTGCAAGTGGTCTTCACTGAATGCCCCAACAGCTCTC<br>TCTTAAACCTTCACTACAGCCCTGCAGCAGAGAACTCAGCCCT<br>GTATCTCTGGCCAGTGGAAACCGGGGAGCTTTTTGGAGAAGCC<br>CTTAGGCTGACCTGACTG<br>ATGTCACAGTGTGCTGCTGGTGTCTGTCTCTGGGAG<br>CAGTCCCATAGACACTGAAGTTACCCAGACACAAACACCTGTG<br>CATGGAAATGACAAAAGAAAGTCTTGAATGTAAGAACTAT<br>TGGGCACAAGAGTGTGCTGTGACCAAGGCTCTGGTCAAGG<br>GCCCCAGTATTTCTCAGTATTATGAGAAAGAGAGAGAAAG<br>AGGAAACTTCCGTGATCGATTCTCAGCTGCCAGTTCCTACTACT<br>AGCTCTGAGTGAATGTGAACCGCTTTGTGCTGGGGACTCGGCC<br>TGTATTTGTGTCAGCAGTGTGGAGTGTGATGAACTGAAAGC<br>TTCTTTTGGCAAGGAGCACTTGAAGTGTGTA<br>ATGGGCACAGCTCTCTGCTGGGCTGTCTGTCTCTGGGAG<br>CAGTCCCATAGACACTGAAGTTACCCAGACACAAACACCTGTG<br>CATGGAAATGACAAAAGAAAGTCTTGAATGTAAGAACTAT<br>TGGGCACAAGGCTATGATTTGTACAAGCAGAAAGCTAAGAAGCC<br>ACCGAGCTCATGTITGTCTACAGCTATGAGAACTCTATAAAT<br>GAAAGTGTGCAAGTGGTCTTCACTGAATGCCCCAACAGCTCTC<br>TCTTAAACCTTCACTACAGCCCTGCAGCAGAGAACTCAGCCCT<br>GTATCTCTGGCCAGTGGAAACCGGGGAGCTTTTTGGAGAAGCC<br>TCTAGGCTGACCTGACTG                                                                                                                                                                                                                                                                                                                                                                                                                                                                                                                                                                                                                                                                                                                                                                                                                                                                                                                                                                                                                                                                                                                                                                                                                                                                                                                                                                                                                                                                                                                                                                                               | ATGGATATCTGGCTCTCTGCTGTGGCCCTTTGTCTCTGGGAGC<br>AGGCCAGTGGATTCTGGAGTCAACAACCCCAAAAGCAGCTGAT<br>CACAGCACTGGACAGCGGATGACGCTAGATGCTCCCTAGTCT<br>TGGAGACTCTGTGTACTGTTACCAACAGAGACTTGGACAGCGGC<br>CTGAGTATGACAATAAGAAAGTCTTGAATGAGGAGCAACATAT<br>GGGACAGAGGCTATGTATGTTACAAGCAGAAAGCTTAAGAAGCC<br>ACCGAGCTCATGTITGTCTACAGCTATGAGAACTCTATAAAT<br>GAAAGTGTGCAAGTGGTCTTCACTGAATGCCCCAACAGCTCTC<br>TCTTAAACCTTCACTACAGCCCTGCAGCAGAGAACTCAGCCCT<br>GTATCTCTGGCCAGTGGAAACCGGGGAGCTTTTTGGAGAAGCC<br>TCTAGGCTGACCTGACTG                                                                                                                                                                                                                                                                                                                                                                                                                                                   |
| S20-1-BA1  | ATGGAGAAAATGTTGGAGTGTGCATTCATAGTCTTGGCTCAGC<br>TTGGCTGGTGTGAGTGGAGAAGACCAGTGTACGAGAGTCCCGAGG<br>CCCTGAGACTCCAGGAGGAGAGAGTACAGTCTCAACTGCAGT<br>ACACAGTACGCGTTTAAAGAGGCTGTTCTGTGATAGGCAAGATC<br>CTGGAAAGGCTGTGATTTCTCTCAGCTGTATCACTGGTGGGA<br>AGAAAAGGAGAAAGAAAGGCTAAAGCCACATTAAACAAGAAGG<br>AAAGCTTCTGCACATCACAGCCCTAAACCTGAAGACTCAGCCA<br>CTTATCTGTGCTGTGCAAGGCTCAGCGGAGGAGGAAACAAC<br>TCACTTTGGGACAGGCACTCAGCTAAAGTGGAACTCAAT<br>ATGAGGCTGGTGGCAAGAGTAAGTGTGTTCTGACCTTTGGAACT<br>ATAATTGATGCTAAGCAACCAGCCACTCCATGATTTGGCTT<br>GAAGGAAGAGCTGTGATTTCTCTCAGCTGTATCACTGGATCAGT<br>GGAATGAGTATGTTATGGTATCAGACAGATTCACCTCCAGGGG<br>CCACAGTATATCATTTGTTTAAAACAAGTAAAACAATGAA<br>ATGGCTCTCTGATCATCAGAAAGACAGAAAGTCCAGCACTTG<br>ATCCTGCCCCAGCTACGCTGAGAGACTGTCTGTACTATTGCA<br>TCGACCTGGATGCCAGACTATGTTGGAGATGGAACCTAGCTGG<br>TGGTGAAGCCCAAT                                                                                                                                                                                                                                                                                                                                                                                                                                                                                                                                                                                                                                                                                                                                                                                                                                                                                                                                                                                                                                                                                                                                                                                                                                                                                                                                                                                                                                                                                                                                                                                                                                                                                                                                                                                                                                                                                                                                                                                                                                                                                     | ATGGATATCTGGCTCTCTGCTGTGGGTTGCTGTTTGTCTCTGGGAGC<br>AGGCCAGTGGACTGGAGTCAACAACCTCAACACACACTGAT<br>CAAAAAGAGAGGAGAGCAAGTGAAGTCTGTAGATGCTCTCTACTCT<br>GGGCACAAGAGTGTCTCTGTTACCAAGAGTCTGGGCTGGGCTCAGGGG<br>CTTATGAGAAAAGGAGTATGTAAGAAGAAAGTCTACTATCT<br>GGCAACTTCCCTGATCGATTCTCAGCTGCCAGTTCCTCACTATA<br>GCTCTGAGCTGATGTGAACCGCTTTGTGCTGGGGACTCGGCC<br>GTATCTCTGTGCCAGCAGCTTGGAGTGGATATGAACACTGAAGCT<br>TTCTTTGGACAAGGCCACAGACTCAGACTGTTGA<br>ATGAGCCTGGGCTCTCTGCTGGGCGGCCCTCTGTCTCTGGGAG<br>CAGACTCACAGAAAGTGGAGTTGCCAGTCTCCAGATATAAGA<br>TTATGAGAAAAGGAGTGTCTTGTGAGAAAGAAAGTCTACTATCT<br>TGGCAGTCTACCCTTACTGTTACCAGACAGACTTGGACAGGGC<br>CAAAGCTTCTGATTCAGTGTAGAATACGGGTGTAGTGGATGATT<br>CACAGTGGCTAAGGATCGATTTCTGAGAGAGGCTCAAAGGAT<br>AGACTCCACTCAAGTCCAACCTGCAAGCTGAGGACTCGGCC<br>GTATCTCTGTGCCAGCAGCTTGAAGGACAGGGGAAAGTACGAG<br>CAGTACTCTGGCCGGGACCAAGCTCACGTTGCA<br>ATGGGCACAGCTCTCTGCTGTGGGCTTCTGTCTCTGGGAG<br>CAGTCCCATAGACACTGAAGTTACCCAGACACAAACACCTGTG |
| S20-1-BA2  | ATGGAGAAAATGTTGGAGTGTGCATTCATAGTCTTGGCTCAGC<br>TTGGCTGGTGTGAGTGGAGAAGACCAGTGTACGAGAGTCCCGAGG<br>CCCTGAGACTCCAGGAGGAGAGAGTACAGTCTCAACTGCAGT<br>ACACAGTACGCGTTTAAAGAGGCTGTTCTGTGATAGGCAAGATC<br>CTGGAAAGGCTGTGATTTCTCTCAGCTGTATCACTGGTGGGA<br>AGAAAAGGAGAAAGAAAGGCTAAAGCCACATTAAACAAGAAGG<br>AAAGCTTCTGCACATCACAGCCCTAAACCTGAAGACTCAGCCA<br>CTTATCTGTGCTGTGCAAGGCTCAGCGGAGGAGGAAACAAC<br>TCACTTTGGGACAGGCACTCAGCTAAAGTGGAACTCAAT<br>ATGAGGCTGGTGGCAAGAGTAAGTGTGTTCTGACCTTTGGAACT<br>ATAATTGATGCTAAGCAACCAGCCACTCCATGATTTGGCTT<br>GAAGGAAGAGCTGTGATTTCTCTCAGCTGTATCACTGGATCAGT<br>GGAATGAGTATGTTATGGTATCAGACAGATTCACCTCCAGGGG<br>CCACAGTATATCATTTGTTTAAAACAAGTAAAACAATGAA<br>ATGGCTCTCTGATCATCAGAAAGACAGAAAGTCCAGCACTTG<br>ATCCTGCCCCAGCTACGCTGAGAGACTGTCTGTACTATTGCA<br>TCGACCTGGATGCCAGACTATGTTGGAGATGGAACCTAGCTGG<br>TGGTGAAGCCCAAT                                                                                                                                                                                                                                                                                                                                                                                                                                                                                                                                                                                                                                                                                                                                                                                                                                                                                                                                                                                                                                                                                                                                                                                                                                                                                                                                                                                                                                                                                                                                                                                                                                                                                                                                                                                                                                                                                                                                                                                                                                                                                     | ATGGATATCTGGCTCTCTGCTGTGGGTTGCTGTTTGTCTCTGGGAGC<br>AGGCCAGTGGACTGGAGTCAACAACCTCAACACACACTGAT<br>CAAAAAGAGAGGAGAGCAAGTGAAGTCTGTAGATGCTCTCTACTCT<br>GGGCACAAGAGTGTCTCTGTTACCAAGAGTCTGGTCAAGG<br>GCCCCAGTATTTCTCAGTATTATGAGAAAGAGAGAGAAAG<br>AGGAAACTTCCGTGATCGATTCTCAGCTGCCAGTTCCTACTACT<br>AGCTCTGAGTGAATGTGAACCGCTTTGTGCTGGGGACTCGGCC<br>TGTATTTGTGTCAGCAGTGTGGAGTGTGATGAACTGAAAGC<br>TTCTTTTGGCAAGGAGCACTTGAAGTGTGTA<br>ATGGGCACAGCTCTCTGCTGGGCTGTCTGTCTCTGGGAG<br>CAGTCCCATAGACACTGAAGTTACCCAGACACAAACACCTGTG<br>CATGGAAATGACAAAAGAAAGTCTTGAATGTAAGAACTAT<br>TGGGCACAAGGCTATGATTTGTACAAGCAGAAAGCTAAGAAGCC<br>ACCGAGCTCATGTITGTCTACAGCTATGAGAACTCTATAAAT<br>GAAAGTGTGCAAGTGGTCTTCACTGAATGCCCCAACAGCTCTC<br>TCTTAAACCTTCACTACAGCCCTGCAGCAGAGAACTCAGCCCT<br>GTATCTCTGGCCAGTGGAAACCGGGGAGCTTTTTGGAGAAGCC<br>TCTAGGCTGACCTGACTG                                                                                                                               |
| S20-1-BA4  | ATGGAGAAAATGTTGGAGTGTGCATTCATAGTCTTGGCTCAGC<br>TTGGCTGGTGTGAGTGGAGAAGACCAGTGTACGAGAGTCCCGAGG<br>CCCTGAGACTCCAGGAGGAGAGAGTACAGTCTCAACTGCAGT<br>ACACAGTACGCGTTTAAAGAGGCTGTTCTGTGATAGGCAAGATC<br>CTGGAAAGGCTGTGATTTCTCTCAGCTGTATCACTGGTGGGA<br>AGAAAAGGAGAAAGAAAGGCTAAAGCCACATTAAACAAGAAGG<br>AAAGCTTCTGCACATCACAGCCCTAAACCTGAAGACTCAGCCA<br>CTTATCTGTGCTGTGCAAGGCTCAGCGGAGGAGGAAACAAC<br>TCACTTTGGGACAGGCACTCAGCTAAAGTGGAACTCAAT<br>ATGAGGCTGGTGGCAAGAGTAAGTGTGTTCTGACCTTTGGAACT<br>ATAATTGATGCTAAGCAACCAGCCACTCCATGATTTGGCTT<br>GAAGGAAGAGCTGTGATTTCTCTCAGCTGTATCACTGGATCAGT<br>GGAATGAGTATGTTATGGTATCAGACAGATTCACCTCCAGGGG<br>CCACAGTATATCATTTGTTTAAAACAAGTAAAACAATGAA<br>ATGGCTCTCTGATCATCAGAAAGACAGAAAGTCCAGCACTTG<br>ATCCTGCCCCAGCTACGCTGAGAGACTGTCTGTACTATTGCA<br>TCGACCTGGATGCCAGACTATGTTGGAGATGGAACCTAGCTGG<br>TGGTGAAGCCCAAT                                                                                                                                                                                                                                                                                                                                                                                                                                                                                                                                                                                                                                                                                                                                                                                                                                                                                                                                                                                                                                                                                                                                                                                                                                                                                                                                                                                                                                                                                                                                                                                                                                                                                                                                                                                                                                                                                                                                                                                                                                                                                     | ATGGATATCTGGCTCTCTGCTGTGGGTTGCTGTTTGTCTCTGGGAGC<br>AGGCCAGTGGACTGGAGTCAACAACCTCAACACACACTGAT<br>CAAAAAGAGAGGAGAGCAAGTGAAGTCTGTAGATGCTCTCTACTCT<br>GGGCACAAGAGTGTCTCTGTTACCAAGAGTCTGGTCAAGG<br>GCCCCAGTATTTCTCAGTATTATGAGAAAGAGAGAGAAAG<br>AGGAAACTTCCCTGATCGATTCTCAGCTGCCAGTTCCTCACTATA<br>GCTCTGAGCTGATGTGAACCGCTTTGTGCTGGGGACTCGGCC<br>GTATCTCTGTGCCAGCAGCTTGGAGTGGATATGAACACTGAAGCT<br>TTCTTTGGACAAGGCCACAGACTCAGACTGTTGA<br>ATGAGCCTGGGCTCTCTGCTGGGCGGCCCTCTGTCTCTGGGAG<br>CAGACTCACAGAAAGTGGAGTTGCCAGTCTCCAGATATAAGA<br>TTATGAGAAAAGGAGTGTCTTGTGAGAAAGAAAGTCTACTATCT<br>TGGCAGTCTACCCTTACTGTTACCAGACAGACTTGGACAGGGC<br>CAAAGCTTCTGATTCAGTGTAGAATACGGGTGTAGTGGATGATT<br>CACAGTGGCTAAGGATCGATTTCTGAGAGAGGCTCAAAGGAT<br>AGACTCCACTCAAGTCCAACCTGCAAGCTGAGGACTCGGCC<br>GTATCTCTGTGCCAGCAGCTTGAAGGACAGGGGAAAGTACGAG<br>CAGTACTCTGGCCGGGACCAAGCTCACGTTGCA<br>ATGGGCACAGCTCTCTGCTGTGGGCTTCTGTCTCTGGGAG<br>CAGTCCCATAGACACTGAAGTTACCCAGACACAAACACCTGTG         |
| S20-1-BA5  | ATGGAGAAAATGTTGGAGTGTGCATTCATAGTCTTGGCTCAGC<br>TTGGCTGGTGTGAGTGGAGAAGACCAGTGTACGAGAGTCCCGAGG<br>CCCTGAGACTCCAGGAGGAGAGAGTACAGTCTCAACTGCAGT<br>ACACAGTACGCGTTTAAAGAGGCTGTTCTGTGATAGGCAAGATC<br>CTGGAAAGGCTGTGATTTCTCTCAGCTGTATCACTGGTGGGA<br>AGAAAAGGAGAAAGAAAGGCTAAAGCCACATTAAACAAGAAGG<br>AAAGCTTCTGCACATCACAGCCCTAAACCTGAAGACTCAGCCA<br>CTTATCTGTGCTGTGCAAGGCTCAGCGGAGGAGGAAACAAC<br>TCACTTTGGGACAGGCACTCAGCTAAAGTGGAACTCAAT<br>ATGAGGCTGGTGGCAAGAGTAAGTGTGTTCTGACCTTTGGAACT<br>ATAATTGATGCTAAGCAACCAGCCACTCCATGATTTGGCTT<br>GAAGGAAGAGCTGTGATTTCTCTCAGCTGTATCACTGGATCAGT<br>GGAATGAGTATGTTATGGTATCAGACAGATTCACCTCCAGGGG<br>CCACAGTATATCATTTGTTTAAAACAAGTAAAACAATGAA<br>ATGGCTCTCTGATCATCAGAAAGACAGAAAGTCCAGCACTTG<br>ATCCTGCCCCAGCTACGCTGAGAGACTGTCTGTACTATTGCA<br>TCGACCTGGATGCCAGACTATGTTGGAGATGGAACCTAGCTGG<br>TGGTGAAGCCCAAT                                                                                                                                                                                                                                                                                                                                                                                                                                                                                                                                                                                                                                                                                                                                                                                                                                                                                                                                                                                                                                                                                                                                                                                                                                                                                                                                                                                                                                                                                                                                                                                                                                                                                                                                                                                                                                                                                                                                                                                                                                                                                     | ATGGATATCTGGCTCTCTGCTGTGGGTTGCTGTTTGTCTCTGGGAGC<br>AGGCCAGTGGACTGGAGTCAACAACCTCAACACACACTGAT<br>CAAAAAGAGAGGAGAGCAAGTGAAGTCTGTAGATGCTCTCTACTCT<br>GGGCACAAGAGTGTCTCTGTTACCAAGAGTCTGGTCAAGG<br>GCCCCAGTATTTCTCAGTATTATGAGAAAGAGAGAGAAAG<br>AGGAAACTTCCCTGATCGATTCTCAGCTGCCAGTTCCTCACTATA<br>GCTCTGAGCTGATGTGAACCGCTTTGTGCTGGGGACTCGGCC<br>GTATCTCTGTGCCAGCAGCTTGGAGTGGATATGAACACTGAAGCT<br>TTCTTTGGACAAGGCCACAGACTCAGACTGTTGA<br>ATGAGCCTGGGCTCTCTGCTGGGCGGCCCTCTGTCTCTGGGAG<br>CAGACTCACAGAAAGTGGAGTTGCCAGTCTCCAGATATAAGA<br>TTATGAGAAAAGGAGTGTCTTGTGAGAAAGAAAGTCTACTATCT<br>TGGCAGTCTACCCTTACTGTTACCAGACAGACTTGGACAGGGC<br>CAAAGCTTCTGATTCAGTGTAGAATACGGGTGTAGTGGATGATT<br>CACAGTGGCTAAGGATCGATTTCTGAGAGAGGCTCAAAGGAT<br>AGACTCCACTCAAGTCCAACCTGCAAGCTGAGGACTCGGCC<br>GTATCTCTGTGCCAGCAGCTTGAAGGACAGGGGAAAGTACGAG<br>CAGTACTCTGGCCGGGACCAAGCTCACGTTGCA<br>ATGGGCACAGCTCTCTGCTGTGGGCTTCTGTCTCTGGGAG<br>CAGTCCCATAGACACTGAAGTTACCCAGACACAAACACCTGTG         |
| SP30-2-BA4 | ATGGAGAAAATGTTGGAGTGTGCATTCATAGTCTTGGCTCAGC<br>TTGGCTGGTGTGAGTGGAGAAGACCAGTGTACGAGAGTCCCGAGG<br>CCCTGAGACTCCAGGAGGAGAGAGTACAGTCTCAACTGCAGT<br>ACACAGTACGCGTTTAAAGAGGCTGTTCTGTGATAGGCAAGATC<br>CTGGAAAGGCTGTGATTTCTCTCAGCTGTATCACTGGTGGGA<br>AGAAAAGGAGAAAGAAAGGCTAAAGCCACATTAAACAAGAAGG<br>AAAGCTTCTGCACATCACAGCCCTAAACCTGAAGACTCAGCCA<br>CTTATCTGTGCTGTGCAAGGCTCAGCGGAGGAGGAAACAAC<br>TCACTTTGGGACAGGCACTCAGCTAAAGTGGAACTCAAT<br>ATGAGGCTGGTGGCAAGAGTAAGTGTGTTCTGACCTTTGGAACT<br>ATAATTGATGCTAAGCAACCAGCCACTCCATGATTTGGCTT<br>GAAGGAAGAGCTGTGATTTCTCTCAGCTGTATCACTGGATCAGT<br>GGAATGAGTATGTTATGGTATCAGACAGATTCACCTCCAGGGG<br>CCACAGTATATCATTTGTTTAAAACAAGTAAAACAATGAA<br>ATGGCTCTCTGATCATCAGAAAGACAGAAAGTCCAGCACTTG<br>ATCCTGCCCCAGCTACGCTGAGAGACTGTCTGTACTATTGCA<br>TCGACCTGGATGCCAGACTATGTTGGAGATGGAACCTAGCTGG<br>TGGTGAAGCCCAAT                                                                                                                                                                                                                                                                                                                                                                                                                                                                                                                                                                                                                                                                                                                                                                                                                                                                                                                                                                                                                                                                                                                                                                                                                                                                                                                                                                                                                                                                                                                                                                                                                                                                                                                                                                                                                                                                                                                                                                                                                                                                                     | ATGGATATCTGGCTCTCTGCTGTGGGTTGCTGTTTGTCTCTGGGAGC<br>AGGCCAGTGGACTGGAGTCAACAACCTCAACACACACTGAT<br>CAAAAAGAGAGGAGAGCAAGTGAAGTCTGTAGATGCTCTCTACTCT<br>GGGCACAAGAGTGTCTCTGTTACCAAGAGTCTGGTCAAGG<br>GCCCCAGTATTTCTCAGTATTATGAGAAAGAGAGAGAAAG<br>AGGAAACTTCCCTGATCGATTCTCAGCTGCCAGTTCCTCACTATA<br>GCTCTGAGCTGATGTGAACCGCTTTGTGCTGGGGACTCGGCC<br>GTATCTCTGTGCCAGCAGCTTGGAGTGGATATGAACACTGAAGCT<br>TTCTTTGGACAAGGCCACAGACTCAGACTGTTGA<br>ATGAGCCTGGGCTCTCTGCTGGGCGGCCCTCTGTCTCTGGGAG<br>CAGACTCACAGAAAGTGGAGTTGCCAGTCTCCAGATATAAGA<br>TTATGAGAAAAGGAGTGTCTTGTGAGAAAGAAAGTCTACTATCT<br>TGGCAGTCTACCCTTACTGTTACCAGACAGACTTGGACAGGGC<br>CAAAGCTTCTGATTCAGTGTAGAATACGGGTGTAGTGGATGATT<br>CACAGTGGCTAAGGATCGATTTCTGAGAGAGGCTCAAAGGAT<br>AGACTCCACTCAAGTCCAACCTGCAAGCTGAGGACTCGGCC<br>GTATCTCTGTGCCAGCAGCTTGAAGGACAGGGGAAAGTACGAG<br>CAGTACTCTGGCCGGGACCAAGCTCACGTTGCA<br>ATGGGCACAGCTCTCTGCTGTGGGCTTCTGTCTCTGGGAG<br>CAGTCCCATAGACACTGAAGTTACCCAGACACAAACACCTGTG         |
| SP30-2-BA6 | ATGGAGAAAATGTTGGAGTGTGCATTCATAGTCTTGGCTCAGC<br>TTGGCTGGTGTGAGTGGAGAAGACCAGTGTACGAGAGTCCCGAGG<br>CCCTGAGACTCCAGGAGGAGAGAGTACAGTCTCAACTGCAGT<br>ACACAGTACGCGTTTAAAGAGGCTGTTCTGTGATAGGCAAGATC<br>CTGGAAAGGCTGTGATTTCTCTCAGCTGTATCACTGGTGGGA<br>AGAAAAGGAGAAAGAAAGGCTAAAGCCACATTAAACAAGAAGG<br>AAAGCTTCTGCACATCACAGCCCTAAACCTGAAGACTCAGCCA<br>CTTATCTGTGCTGTGCAAGGCTCAGCGGAGGAGGAAACAAC<br>TCACTTTGGGACAGGCACTCAGCTAAAGTGGAACTCAAT<br>ATGAGGCTGGTGGCAAGAGTAAGTGTGTTCTGACCTTTGGAACT<br>ATAATTGATGCTAAGCAACCAGCCACTCCATGATTTGGCTT<br>GAAGGAAGAGCTGTGATTTCTCTCAGCTGTATCACTGGATCAGT<br>GGAATGAGTATGTTATGGTATCAGACAGATTCACCTCCAGGGG<br>CCACAGTATATCATTTGTTTAAAACAAGTAAAACAATGAA<br>ATGGCTCTCTGATCATCAGAAAGACAGAAAGTCCAGCACTTG<br>ATCCTGCCCCAGCTACGCTGAGAGACTGTCTGTACTATTGCA<br>TCGACCTGGATGCCAGACTATGTTGGAGATGGAACCTAGCTGG<br>TGGTGAAGCCCAAT                                                                                                                                                                                                                                                                                                                                                                                                                                                                                                                                                                                                                                                                                                                                                                                                                                                                                                                                                                                                                                                                                                                                                                                                                                                                                                                                                                                                                                                                                                                                                                                                                                                                                                                                                                                                                                                                                                                                                                                                                                                                                     | ATGGATATCTGGCTCTCTGCTGTGGGTTGCTGTTTGTCTCTGGGAGC<br>AGGCCAGTGGACTGGAGTCAACAACCTCAACACACACTGAT<br>CAAAAAGAGAGGAGAGCAAGTGAAGTCTGTAGATGCTCTCTACTCT<br>GGGCACAAGAGTGTCTCTGTTACCAAGAGTCTGGTCAAGG<br>GCCCCAGTATTTCTCAGTATTATGAGAAAGAGAGAGAAAG<br>AGGAAACTTCCCTGATCGATTCTCAGCTGCCAGTTCCTCACTATA<br>GCTCTGAGCTGATGTGAACCGCTTTGTGCTGGGGACTCGGCC<br>GTATCTCTGTGCCAGCAGCTTGGAGTGGATATGAACACTGAAGCT<br>TTCTTTGGACAAGGCCACAGACTCAGACTGTTGA<br>ATGAGCCTGGGCTCTCTGCTGGGCGGCCCTCTGTCTCTGGGAG<br>CAGACTCACAGAAAGTGGAGTTGCCAGTCTCCAGATATAAGA<br>TTATGAGAAAAGGAGTGTCTTGTGAGAAAGAAAGTCTACTATCT<br>TGGCAGTCTACCCTTACTGTTACCAGACAGACTTGGACAGGGC<br>CAAAGCTTCTGATTCAGTGTAGAATACGGGTGTAGTGGATGATT<br>CACAGTGGCTAAGGATCGATTTCTGAGAGAGGCTCAAAGGAT<br>AGACTCCACTCAAGTCCAACCTGCAAGCTGAGGACTCGGCC<br>GTATCTCTGTGCCAGCAGCTTGAAGGACAGGGGAAAGTACGAG<br>CAGTACTCTGGCCGGGACCAAGCTCACGTTGCA<br>ATGGGCACAGCTCTCTGCTGTGGGCTTCTGTCTCTGGGAG<br>CAGTCCCATAGACACTGAAGTTACCCAGACACAAACACCTGTG         |

Supplemental table 5 Sequence list of primers

| SEQ ID | Name                             | Sequence               |
|--------|----------------------------------|------------------------|
| NO. 1  | Mouse T Cell Mix 2 PN-2000079 Pb | GGCCAAGCACACGAGGGTA    |
| NO. 2  | CN24613-1VseqF                   | TGGAGGAGGAAGAGCTCAGA   |
| NO. 3  | CN803-seqR                       | AAGAGACAGCAACCAGGATTTA |



## SUPPLEMENTAL PLASMID SEQUENCE

### Supplemental plasmid sequence No. 1

#### lenti-BSD-T2A-EGFP:

GTCGACGGATCGGGAGATCTCCCGATCCCTATGGTGCAGTCTCAGTACAATCTGCTCTGATGCCGCATAGTTAAGCCAGTAT  
 CTGCTCCCTGCTTGTGTGTGGAGGTGCTGAGTAGTGCGCGAGCAAAATTAAGCTACAACAAGGCAAGGCTTGACCCGAC  
 AATTGCATGAAGAATCTGCTTAGGGTTAGGCGTTTTGCGCTGCTTCGCGATGTACGGGCCAGATATACGCGTTGACATTGATT  
 ATTGACTAGTTAATAATAGTAATCAATACGGGGTCATTAGTTCATAGCCCATATATGGAGTTCGCGTTACATAACTTACGGTA  
 AATGGCCCGCTGGCTGACCGCCCAACGACCCCGCCATTGACGTCAATAATGACGTATGTTCCCATAGTAACGCCAATAG  
 GGACTTTCCATTGACGTCAATGGGTGGAGTATTTACGGTAACTGCCACTTGGCAGTACATCAAGTGTATCATATGCCAAGT  
 ACGCCCTTATTGACGTCAATGACGGTAAATGGCCCGCTGGCATTATGCCAGTACATGACCTTATGGGACTTCTACTTGG  
 GCAGTACATCTACGTATTAGTACATCGCTATTACCATGGTGTATGGGTTTTGGCAGTACATCAATGGGCGTGGATAGCGGTTTGA  
 CTCACGGGATTTCCAAGTCTCCACCCATTGACGTCAATGGGAGTTTTGTTTTGGCACAAAATCAACGGGACTTCCAAAA  
 TGTCTGTAACAACCTCCGCCCAATTGACGCAAAATGGGCGTAGGCGTGTACGGTGGGAGGTCTATATAAGCAGCGGTTTTGCC  
 TGTACTGGGTCTCTGTTAGACCAGATCTGAGCCTGGGAGCTCTCTGGTAACTAGGGAACCCACTGCTTAAAGCCTCAAT  
 AAAGCTTGCCCTGAGTGTCTCAAGTAGTGTGTGCCCTCTGTTGTGTGACTCTGGTAACTAGAGATCCCTCAGACCCCTTTA  
 GTCAGTGTGAAAATCTCTAGCAGTGGCGCCGAACAGGGACTTGAAAGCGAAAAGGGAACCAGAGGAGCTCTCTCGACG  
 CAGGACTCGGCTGTGTAAGCGCGCACGGCAAGAGGCGAGGGGCGCGACTGGTGTAGTACGCCAAAAATTTGACTAGCGG  
 GAGGCTAGAAGGAGAGAGATGGGTGCGAGAGCGTCAGTATTAAGCGGGGAGAATTAGATCGCGATGGGAAAAAATTCGG  
 TTAAGGCCAGGGGAAAGAAAAATATAAATTAACATATAAGTATGGGCAAGCAGGGAGCTAGAACGATTTCGAGTTAATC  
 CTGGCCTGTGAAACATCAGAAGGCTGTAGACAAATACTGGGACAGCTACAACCATCCCTCAGACAGGATCAGAAGAAC  
 TTAGATCATTATATAATACAGTAGCAACCCCTATTGTGTGCATCAAAGGATAGAGATAAAAGACACCAAGGAAGCTTTAGAC  
 AAGATAGAGGAAGAGCAAAAACAAAAGTAAGACCACCGCACAGCAAGCGGCCGCTGATCTTCAGACCTGGAGGAGGAGATA  
 TGAGGGACAATTGGAGAAGTGAATTATATAAATAAAGTAGTAAAAATTGAACCATTAGGAGTAGCACCCACCAAGGCAAA  
 GAGAAGAGTGGTGCAGAGAGAAAAAGAGCAGTGGGAATAGGAGCTTTGTTCTTGGGTTCTTGGGAGCAGCAGGAAGC  
 ACTATGGGCGCAGCGTCAATGACGCTGACGGTACAGGCCAGACAATTAITGTCTGTATAGTGCAGCAGCAGAACAATTTGC  
 TGAGGGCTATTGAGGGCAACAGCATCTGTGCAACTCACAGTCTGGGGCATCAAGCAGCTCCAGGCAAGAATCCTGGCTG  
 TGGAAAGATACCTAAAGGATCAACAGCTCTGGGATTTGGGGTTGCTCTGGAAAACTCATTTGCACCAGTGTGCTGTTG  
 GAATGCTAGTTGGAGTAATAAATCTCTGGAACAGATTGGAATCACACGACCTGGATGGAGTGGGACAGAGAAATTAACAAT  
 TACACAAGCTTAATACACTCCTTAATTGAAGAATCGCAAAACAGCAAGAAAAGAAATGAACAAGAATTATTGGAATTAGATA  
 AATGGGCAAGTTTGTGGAATTGGTTTAAACATAACAAATTGGCTGTGGTATATAAAATTAATCATAATGATAGTAGGAGGCTTGG  
 TAGGTTTAAAGAAATAGTTTTGTGCTACTTCTATAGTGAATAGAGTTAGGCAGGGATATTCACCATTATCGTTTCAGACCCACC  
 TCCCAACCCCGAGGGACCCGACAGGCCGAAGGAATAGAAGAAGAGGTGGAGAGAGAGACAGAGACAGATCCATTCCG  
 ATTAGTGAACGGATCGGCACTGCGTGTGCGCAATTCTGACAGACAAATGGCAGTATTCATCCACAATTTTAAAAGAAAAGGGGG  
 GATTGGGGGTACAGTGCAGGGGAAAGAATAGTAGACATAATAGCAACAGACATACAACTAAAGAATTACAAAAACAAT  
 TACAAAAATTCAAAATTTTCGGGTTTATTACAGGGACAGCAGAGATCCAGTTTGGTTAATTAGCTAGCTAGGCTTTGAAAGG  
 AGTGGGAATTGGCTCCGTTGCCGTCAGTGGGCAGAGCGCACATCGCCACAGTCCCGAGAAAGTTGGGGGAGGGGTCG  
 GCAATTGATCCGGTGCCTAGAGAAGGTGGCGCGGGTAAACTGGGAAAGTGTGCTGCTGACTGGCTCCGCTTTTCCCG  
 AGGGTGGGGGAGAACCGTATATAAGTGCAGTAGTCGCCGTGAACGTTCTTTTTCGCAACGGGTTTCCGCCAGAACACAGG  
 ACCGGTTCTAGAGCCACCATGGCCAAGCCTTTGTCTCAAGAAGAATCCACCCTCATTGAAAGAGCAACGGCTACAATCAAC  
 AGCATCCCCATCTGAAGACTACAGCGTCGCCAGCGCAGCTCTCTTAGCGACGGCCGATCTTCACTGGTGTCAATGTATA  
 TCATTTTACTGGGGACCTTTGTGCAGAACTCGTGGTGTGGGACTGCTGCTGCTGCGGCAGCTGGCAACCTGACTGTATC  
 GTCGCGATCGGAAATGAGAACAGGGGATCTTGAGCCCTGCGGACGGTGGCAGAGGTGCTTCTCGATCTGCATCCTGGG  
 ATCAAAGCCATAGTAAGGACAGTATGGACAGCCGACGCGAGTTGGGATTCGTGAATTGCTGCCCTCTGGTTATGTGTGGG  
 AGGGCGGCTCCGAGAGGGCAGGGGAAGTCTGCTAACTGCGGCGACGTTGGAGGAAAATCCCGCCCCGGATCCATGGTG  
 AGCAAGGGCGAGGAGCTGTTACCGGGTGTGCCCCATCTGTGTCGAGCTGGACGGCGACGTAACCGCCACAAGTTTCAG  
 CGTGTCCGGCAGGGGAGGGCGATGCCACCTACGGCAAGCTGACCCTGAAGTTCATCTGCACCACCGGCAAGCTGCCCGT  
 GCCCTGGCCACCCCTCGTGACCACCTGACCTACGGCGTGCAGTGTTCAGCCGCTACCCCGACCACATGAAGCAGCACGA  
 CTCTTCAAGTCCGCCATGCCCGAAGGCTACGTCCAGGAGCGCACCATCTTCTCAAGGACGACGGCAACTACAAGACCCG  
 CGCCGAGGTGAAGTTCAGGGGCGACACCCTGGTGAACCGCATCGAGCTGAAGGGCATCGACTTCAAGGAGGACGGCAACA  
 TCCTGGGGCACAAGCTGGAGTACAATAACAGCCACAACGCTATATCATGGCCGACAAGCAGAAGAACCGGCATCAAGG  
 TGAACCTCAAGATCCGCCACAACATCGAGGACGGCAGCGTGCAGCTCGCCGACCACTACCAGCAGAACACCCCATCGGGC

ACGGCCCCGTGCTGCTGCCCGACAACACTACCTGAGCACCCAGTCCGCCCTGAGCAAAGACCCCAACGAGAAGCGCGAT  
CACATGGTCTGCTGGAGTTGCTGACCCGCGCCGGGATCACTCTCGGCATGGACGAGCTGTACAAGTAAGAATTCGATATCA  
AGCTTATCGGTAATCAACCTCTGGATTACAAAATTTGTGAAAGATTGACTGGTATTCTTAACTATGTTGCTCCTTTTACGCTAT  
GTGGATACGCTGCTTAATGCCTTTGTATCATGCTATTGCTTCCCGTATGGCTTTCATTTTCTCCTCCTTGTATAAATCTGGTTG  
CTGTCTCTTATGAGGAGTTGTGGCCCGTTGTCAGGCAACGTGGCGTGGTGTGCACTGTGTTGCTGACGCAACCCCACTG  
GTTGGGGCATTGCCACCACCTGTCAGTCCCTTCCGGGACTTTCGCTTCCCCCTCCCTATTGCCACGGCGGAACCTATCGCC  
GCCTGCCTTGCCCGTGTGACAGGGGCTCGGCTGTGGGCACTGACAATCCGTGGTGTGTCGGGGAAATCATCGTCT  
TTCCTTGGCTGCTCGCTGTGTTGCCACCTGGATTCTGCGCGGACGTCCTTCTGTACGTCCCTTCGGCCCTCAATCCAGCG  
GACCTTCTTCCCGCGCCCTGCTGCCGCTCTGCGGCTCTTCCGCGTCTTCGCTTCGCCCTCAGACGAGTCGGATCCTCC  
TTTGGGCGCCCTCCCGCATCGATACCGTTCGACCTCGAGACCTAGAAAAACATGGAGCAATACAAGTAGCAATACAGCAG  
CTACCAATGCTGATTGTGCTGGCTAGAAGCAACAAGAGGAGGAGGAGGTTTCCAGTCACACCTCAGGTACCTTTAA  
GACCAATGACTTACAAGCAGCTGTAGATCTTAGCCACTTTTTAAAGAAAAGGGGGACTGGAAGGGCTAATCACTCCC  
AACGAAGACAAGATATCTTGTATCTGTGGATCTACCACACACAAGGCTACTTCCCTGATTGGCAGAACTACACACCAGGGCC  
AGGGATCAGATATCCACTGACCTTTGGATGGTGTACAAGCTAGTACCAGTTGAGCAAGAGAAGGTAGAAGAAGCCAAATGA  
AGGAGAGAACACCCGCTTGTACACCCTGTGAGCCTGCATGGATGGATGACCCGGAGAGAGAAGTATTAGAGTGGAGGTT  
TGACAGCCGCTAGCATTTTATCAGATGGCCCGAGAGCTGCATCCGACTGTACTGGTCTCTCTGGTTAGACCAGATCTGA  
GCCTGGGAGCTCTCTGGCTAACTAGGGAACCCACTGCTTAAAGCTCAATAAAGCTTGCCTTGAAGTCTCAAGTAGTGTGTG  
CCGCTGTGTTGTGACTCTGGTAACTAGAGATCCCTCAGACCTTTTAGTCAGTGTGGAAAATCTTAGCAGGGCCCGTTT  
AAACCCGCTGATCAGCTCGACTGTGCCTTCTAGTTGCCAGCCATCTGTTGTTTGGCCCTCCCGTGCCCTTCTTACCCCTG  
GAAGGTGCCACTCCACTGTCTTCTAATAAAAATGAGGAAATGCATCGCATTGTCTGAGTAGGTGTCATTCTATCTGGG  
GGTGGGGTGGGCAGGACAGCAAGGGGAGGATTGGGAAGACAATAGCAGGCATGCTGGGGATGCGGTGGGCTCTATGG  
CTTCTGAGGCGGAAAGAACCAGCTGGGGCTTAGGGGTATCCCCACGCGCCCTGTAGCGCGCATTAAAGCGCGGGGTG  
TGGTGGTTACCGCAGCGTGACCGCTACACTTGCAGCCCTAGCAGCCCTGCTTTCGCTTCTTCCCTTCTCTCGCC  
ACGTTCCGCGGCTTTCCCGTCAAAGCTCAAATCGGGGCTCCCTTTAGGGTTCCGATTAGTGTCTTACGGCACCTCGACCC  
CAAAAACTTGTATTAGGGTATGTTTACAGTAGTGGGCCATCGCCCTGATAGACGGTTTTTTCGCCCTTGTACGTTGGAGTCC  
ACGTTCTTAAATAGTGGACTCTGTTCAAAACCTGGAACAACACTCAACCCTATCTCGGTCTATTCTTTGATTATAAGGGATT  
TTGCCGATTTCGGCTATTGGTTAAAAAATGAGCTGATTAAACAAAATTTAACGCGAATTAATTCTGTGGAATGTGTGTCAG  
TTAGGGTGTGGAAGTCCCGAGGCTCCCGAGCAGGAGAGTATGCAAAGCATGCATCTCAATTAGTCAGCAACCAGGTGT  
GGAAGTCCCGAGGCTCCCGAGCAGGAGAGTATGCAAAGCATGCATCTCAATTAGTCAGCAACCAGGTGT  
ACTCCGCCATCCCGCCCTAACTCCGCCAGTTCGCCCAATCTCCGCCCATGGCTGACTAATTTTTTTTATTATGACAGAG  
GCCGAGGCGCCTCTGCTCTGAGCTATTCCAGAAGTAGTGAGGAGGCTTTTTTGGAGGCTAGGCTTTTGAAAAAGCTCC  
CGGAGCTTGTATATCCATTTTCGGATCTGATCAGCACGTGTTGACAATTAATCATCGGCATAGTATATCGGCATAGTATAATC  
GACAAGGTGAGGAACTAAACCATGGCAAGTTGACCAGTGCCGTTCCGGTGTACCCGCGCGCAGCTCGCCGGAGCGGT  
CGAGTTCTGACCCGCGCTCGGGTCTCCCGGACTTCTGGGAGGACGACTTCGCCGGTGTGGTCCGGGACGACGTGA  
CCCTGTTATCAGCGCGTCCAGGACCAGGTGGTCCGGAACAACCCCTGGCTGGGTGTGGGTGCGCGGCTGGACGAG  
CTGTACGCGAGTGGTGGAGTCTGTCCAGAACTCCGGGACGCTCCGGGCGGCCATGACCGAGATCGGCGAGCA  
GCCGTGGGGCGGGAGTTCGCCCTGCGGACCCGCGGCAACTGCGTGCATCTCGTGGCCGAGGAGCAGGACTGACAG  
TGCTACGAGATTCGATTCCACCGCCGCTTCTATGAAAGTTGGGCTTCGGAATCGTTTTCCGGGACGCGGCTGGATGATC  
CTCCAGCGGGGATCTATGCTGGAGTTCTTCGCCACCCCAACTTGTATTGTCAGCTTATAATGGTTACAAATAAAGCAA  
TAGCATCAAAATTCACAAATAAAGCATTTTTTCACTGCATCTAGTTGTGGTTTTGTCCAAACTCATCAATGTATCTTATCAT  
GTCTGTATACCGCTCGACCTCTAGCTAGAGCTTGGCGTAATCATGGTCATAGCTGTTTCTGTGTGAAATGTTATCCGCTCACA  
ATCCACACAACATACGAGCCGGAAGCATAAAGTGTAAAGCTGGGGTGCCTAATGAGTGAGCTAACTCACATTAATTGCGT  
TGCGCTCACTGCCGCTTTCCAGTCGGGAAACCTGTCGTGCCAGCTGCATTAATGAATCGGCCAACGCGCGGGGAGAGGG  
GTTTGGCTATTGGGCGCTCTCCGCTTCTCGCTCACTGACTCGCTGCGCTCGGTTCGGCTGCGGCGAGCGGTATCAGC  
TCACTCAAAGGCGGTAATACGGTTATCCACAGAATCAGGGGATAACGCAAGAAAGAACATGTGAGCAAAAAGGCCAGCAAA  
AGGCCAGGAACCGTAAAAAGGCCGCTGTGCTGGCGTTTTTCCATAGGCTCCGCCCTGACGAGCATCAAAAAATCGAC  
GCTCAAGTCAGAGGTGGCGAAACCCGACAGGACTATAAAGATACCAGGCGTTTTCCCTGGAAAGCTCCCTCGTGGCTCTC  
CTGTTCCGACCTGCGCTTACCGGATACCTGTCCGCCTTCTCCCTTCGGGAAGCGTGGCGCTTCTCATAGCTCAGCTGT  
AGGTATCTCAGTTCGGTGTAGTCTGCTCCAAGCTGGGCTGTGTGCAGCAACCCCGTTTCAGCCGACCGCTGCGCT  
TATCCGGTAACTATCTGTTGAGTCCAACCCGTAAGACACGACTTATCGCACTGGCAGCAGCACTGGTAACAGGATTAG  
CAGAGCGAGGTATGTAGGCGGTGTACAGAGTTCTTGAAGTGGTGGCCTAACTACGGCTACTAGAGAACAAGTATTTGGT  
ATCTGCGCTCTGTGAAGCCAGTTACCTTCGGAAGAGAGTGGTAGCTTTGATCCGGCAACAAACCACCGCTGGTAGC  
GGTGGTTTTTTTGTGCAAGCAGCAGATTACGCGCAGAAAAAAGGATCTCAAGAAGATCCTTTGATCTTTTACGGGGT  
CTGACGCTCAGTGAACGAAAACCTACGTTAAGGATTTTGGTCAAGATTATCAAAAAGGATCTTCACTAGATCCTTTT

AAATTAATAAATGAAGTTTTAAATCAATCTAAAGTATATATGAGTAAACTTGGTCTGACAGTTACCAATGCTTAATCAGTGAGG
CACCTATCTCAGCGATCTGTCTATTTCCGTTTCATCCATAGTTGCCTGACTCCCCGTCGTGTAGATAACTACGATACGGGAGGGCT
TACCATCTGGCCCCAGTGTGCAATGATACCGCGAGACCCACGCTACCCGGCTCCAGATTTATCAGCAATAAACAGCCAGC
CGGAAGGGCCGAGCGCAGAAAGTGGTCTGCAACTTTATCCGCTCCATCCAGTCTAITTAATGTTGCCGGGAAGCTAGAGTA
AGTAGTTCGCCAGTTAATAGTTTGCACAACGTTGTTGCCATTGCTACAGGCATCGTGGTGTACGCTCGTCTTGGTATGCC
TTCATTAGCTCCGGTTCCCAACGATCAAGGGGAGTTACATGATCCCCATGTTGTGCAAAAAAGCGGTTAGTCTCTCCGGT
CCTCCGATCGTTGTGAGAAGTAAGTTGGCCGAGTGTATCACTCATGGTTATGGCAGCACTGCATAATTCTCTACTGTGCAT
GCCATCCGTAAGATGCTTTTCTGTGACTGGTGAGTACTCAACCAAGTCACTCTGAGAATAGTGTATGGCGGACCGAGTTGC
TCTTGCCCGCGTCAATACGGGATAATACCGGCCACATAGCAGAACTTTAAAGTGCTCATCATTTGAAAAAGCTTTCTCCG
GGGCAAACTCTCAAGGATCTTACCGCTGTTGAGATCCAGTTTCGATGTAACCCACTCGTGACCCAACTGATCTCAGCATC
TTTTACTTTACCAGCGTTTCTGGGTGAGCAAAAACAGGAAGGCAAAATGCCGCAAAAAAGGGAATAAGGGGCACACGGA
AATGTTGAATACTCATACTCTCTCTTTTCAATATTATTGAAGCATTTATCAGGGTTATTGTCTCATGAGCGGATACATATTTGAA
TGATTTAGAAAAATAACAAATAGGGGTTCCCGCGCACATTTCCCGAAAAAGTGCCACCTGAC

Supplemental plasmid sequence No. 2

lenti-BSD-T2A-TK412:

GTCCGACGATCCGGAGATCTCCCGATCCCTATGGTGCCTCTCAGTACAATCTGCTCTGATGCCGATAGTTAAGCCAGTAT
CTGCTCCCTGCTGTGTGGAGGTCGTGAGTAGTGCCGAGCAAAAATTAAGTACAACAAGGCAAGGCTTGACCCGAC
AATTGCATGAAGAATCTGCTTAGGGTTAGGGCTTTTGGCTGCTTCGCGATGTACGGGCCAGATATACCGGTTGACATTGATT
ATTGACTAGTTATTAATAGTAATCAATTACGGGGTCAATTAGTTCATAGCCATATATGGAGTTCCCGCTTACATAACTACGGTA
AATGGCCCGCTGGCTGACCGCCCAACGACCCCGCCATTGACGTCAATAATGACGTATGTTCCCATAGTAACGCCAATAG
GGACTTTCCATTGACGTCAATGGGTGGAGTATTTACGGTAACTGCCCACTGGCAGTACATCAAGTGTATCATATGCCAAGT
ACGCCCTTATTGACGTCAATGACGGTAAATGGCCCGCTGGCATTTATGCCAGTACATGACCTTATGGGACTTTCTACTTGT
GCAGTACATCTACGTATTAGTCACTCGTATTACCATGGTGTATGGGTTTGGCAGTACATCAATGGGGCTGGATAGCGGTTGA
CTCACGGGATTTCCAAGTCTCCACCCATTGACGTCAATGGGAGTTTGTGTTGGCACAAAATCAACGGGACTTTCCAAAA
TGTGTAACAACCTCCGCCCAATTGACGCAAAATGGGCGGTAGGCGTGTACGGTGGGAGGTTCTATATAAGCAGCGCTTTTGGC
TGACTGGGTCTCTCTGGTTAGACCAGATCTGAGCCTGGGAGCTCTCTGGCTAACTAGGGAACCCACTGCTTAAAGCTCAAT
AAAGCTTGCCTTGAGTGTCTCAAGTAGTGTGCCCCGTCTGTTGTGTGACTCTGGTAACTAGAGATCCCTCAGACCCCTTTA
GTCAGTGTGGAAAATCTCTAGCAGTGGCGCCCAACAGGGACTTGAAAGCGAAAGGGAAACCAGAGGAGCTCTCTCGACG
CAGGACTGGTTGTGAAAGCGCGCACGGCAAGAGGCGAGGCGGCGACTGGTGTAGTACGCCAAAAATTTTGGACAGCG
GAGGCTAGAAGGAGAGAGATGGGTGCGAGAGCGTCAATTAAGCGGGGGAGAATTAGATCGCATGGGAAAAAATTCGG
TTAAGGCCAGGGGAAAGAAAAATATAATTAACATATAGTATGGCAAGCAGGGAGCTAGAACGATTCGCAAGTTAATC
CTGGCTTTAAGAAATAGTTGAAGCGCGCACGGCAAGAGGCTGTAGACAATACTGGGACAGCTACAACCTCCCTCAGACAGGAAAC
TTAGATCATTATATAATACAGTAGCAACCCCTTATTGTGTGCATCAAAGGATAGAGATAAAAGACACCAAGGAAGCTTTAGAC
AAGATAGAGGAAGAGCAAAAACAAAAGTAAGACCACCGCAGCAAGCAAGCGGCCGCTGATCTTACACCTGGAGGAGGAGATA
TGAGGGACAATTGGAGAAAGTGAATTATATAAATATAAAGTAGTAAAAATTGAACCATTAGGAGTAGCACCCACCAAGGCAAA
GAGAAGAGTGGTGACAGAGAGAAAAAGAGCAGTGGGAATAGGAGCTTTGTTCTTGGGTCTTTGGGAGCAGCAGGAAAGC
ACTATGGGCGCAGCGTCAATGACCGTACCGGTACAGGCCAGACAATAATTGTTGCTGGTATAGTGCAGCAGCAAGCAAAATTTGC
TGAGGGCTATTGAGGCGCAACAGCATCTGTTGCAACTCACAGTCTGGGGCATCAAGCAGCTCCAGGCAAGAATCCTGGCTG
TGGAAAGATACCTAAAGGATCAACAGCTCCTGGGGATTGGGGTTGCTCTGGAAAACCTATTGCAACCACTGCTGTGCCTTG
GAATGCTAGTTGGAGTAATAAATCTCTGGAACAGATTGGAAATCACACGACCTGGATGGAGTGGGACAGAAATAACAAAT
TACACAAGCTTAATACACTCCTTAATTGAAGAATCGCAAAACCAGCAAGAAAAGAAATGAACAAGAAATTTGGAATTAGATA
AATGGGCAAGTTTGTGGAATTGGTTAAACATAACAATTTGGCTGTGGTATATAAAATTAATTCATAATGATAGTAGGAGGCTTGG
TAGGTTTAAAGAAATAGTTTGTGCTGTACTTCTATAGTGAATAGAGTTAGGCAGGGATATTCAACCTATTACGTTTTCAGACCCACC
TCCCAACCCCGAGGGGACCCGACAGGCCCAAGGAATAGAAAGAAAGAGGTTGGAGAGAGAGACAGAGACAGATCCATTCG
ATTAGTGAACGGATCGGCACTGCGTGCGCCAATTTCTGAGACAAATGGCAGTATTTCATCCAAATTTAAAAAGAAAAGGGGG
GATTTGGGGGTACAGTGCAGGGGAAAGAATAGTAGACATAATGCAACAGACATACAACTAAAGAATTAACAAAACAAAT
TACAAAAATTCAAAATTTTCGGGTTTATTACAGGGACAGCAGAGATCCAGTTTGGTTAATTAGCTAGCTAGGTCTTTGAAAGG
AGTGGGAATTGGCTCCGGTGCCGTCAGTGGGCAGAGCCACATCGCCACAGTCCCGAGAAGATTGGGGGAGGGGTCG
GCAATTGATCCGGTGCCTAGAGAAGTGTGGCGGGGTAACCTGGGAAAAGTGTATGTCGTACTGGCTCCGCCCTTTTCCCG
AGGGTGGGGGAGAACCGTATATAAGTGCAGTAGTCCGGTGAACGTTCTTTTCGCAACGGGTTTCCCGCAGAACACAGG
ACCGGTTCTAGACCACCATGGCCAAGCCTTTGTCTCAAGAAGAATCCACCCCTATTGAAAGAGCAACGGCTACAATCAAC
AGCATCCCCATCTGAAGACTACAGCGTCCGACGCGAGCTCTCTAGCGACGGCCGATCTTCACTGGTGTCAATGTATA
TCATTTTACTGGGGGACTTGTGCAGAACTCGTGTGTGGGCACTGTGCTGCTGCGGCAGCTGGCAACCTGACTGTATCT
GTCCGATCGGAAATGAAACAGGGGCACTTTGAGCCCTCGGACGGTGGCGACAGGTGCTTCTCGATCTGCATCTCGGG
ATCAAAGCCATAGTAAGGACAGTGTAGACAGCCGACGGCAGTTGGGATTCTGTAATTGCTGCCCTCTGGTTATGTGTGGG
AGGGCGGCTCCGGAGAGGGCAGGGGAAGTCTGCTAACCTGCGGCGAGCTGGAGGAAAAATCCCGGCCCAATGTCTAACACT
GCCTTCCCTGACCCCGCTGGAAACACCACTCTGATCTTGGGTTGCTCTTTCTCCTGGGAAACAAGTTTCAGCAAAATCTG
GGGTTGTCAGTCTCCAAGATACATAATCAAAGGAAAGGGAGAAAGTCCATTCTAAAATGTATTCCATCTCTGGACATCT
CTCTGTGGCTGGTATCAACAGACTCAGGGGCAGGAACCTAAAGTTCTTCAATTCAGCATTATGATAAAATGGAGAGAGATAAA
GGAACCTGCCAGCAGATTCTCAGTCCAACAGTTGATGACTATCACTCTGAGATGAACATGAGTGCCTTGGAGCTAGAGG
ACTCTGCCGTGACTTCTGTGCCAGCTCTCACAGATCCGCTAGACTCCGACTACACCTTCGGCTCAGGGACCAAGGCTTTT
GGTAATAGAGACCTCGCAACGTCACCCCAAAAGGTCAGTTTGTGAGCCATCAAAGGGGAGATTGCCCAACAACA
GAAAGACTCCCTGCTGTGCTTGGCCCGGGCTCTTCCAGACCAGTGAACCTTCTGGTGGGTAATGGAAAGGAGG
TCATTTCCGGAGTGTGCACTGATCCCCAAGCGTACAAGGAATCCAACTATAGCTACTGTCTCTCATCTCGGGTCCCGGTGAGGT
CGGACATTTGGCATAATCTCGGAACCACTTTCGATGCAAGTGCAGTTTCATGGGTTGAGCGAGGAACAAGTGGCC
GAGGGCAGTCTAAACCAGTCACTCAAAAACATAAGCGCCGAGGCATGGGGTAGAGCCGATTGTGGGATTAAGTCCCTTAC
ACCAACAAGGGGATTGAGCGCTACAATTTCTTACGAAATTTCTCTCGGCAAGGCGACGCTCTACGCCGACTGGTGTCTAC
TCTCGTGGTTATGGCAATGGTGAACGGAAAAACAGCAGAGCCAAAAAGTGGTTCTGGCCGCCCAACTTTAGCCCTGCT

GAAACAGGCCGGGACGTTGGAAGAGAACCCTGGCCCATGCAGAGGAACCTGGGAGCTGTGCTGGGGATTCTGTGGGTGC  
AGATTTGCTGGGTGAGAGGGGATCAGGTGGAGCAGAGTCTTCCAGCCCTGAGCCTCCACGAGGGAACCCGATTCTGTCTGA  
GATGCAATTTTACGACCACCATGAGGAGTGTGCAGTGGTCCGACAGAAATTCAGGGGAGCCCTCATCAGTTTGTCTACTT  
GGCTTCAGGAACAAGGAGAATGGGAGGCTAAAGTCAGCATTGTGATTCTAAGGAGCGGGCTACAGCACCTGCACATCAG  
GGATGCCAGCTGGAGGACTCAGGCCTACTTCTGTGCTGCTGACTTTCGAAACACGGGTTACCAGAACTTCTATTTTGGG  
AAAGGAACAAGTTTGACTGTCAATCCAAACATTCAGAACCCCGAACCCAGCCGATATCAGTTGAAGGACCCAAGATCTCAG  
GATAGTACACTCTGCTGTTCCAGGACTTTGACTCACAATCAACGTCCCGAAGACTATGGAAGTGGTACGTTTATCAGAG  
ATAAGTGGCTTCTGGACATGAAGGCTATGGACTCAAAGAGCAACGGGGCAATTGCTTGGTCCAACAGACAAGCTTTACCT  
GTCAGGACATTTTAAAGGAGACTAATGCTACTTATCCCTCCAGCAGCTTCCGCTGTGATGCGACTTACCAGAGAAGTCTTTT  
GAGACCGATATGAATCTCAACTCCAGAACTGCTGGTGTACTTCTGCGGATCCCTGCTTCTGAAGGTGTCAGGATTCAATCT  
TCTTATGACTCTCCGGCTCTGGTCTTCATGATGGAATTCGATATCAAGCTTATCGGTAATCAACCTCTGGATTACAAAATTTGT  
GAAAAGATTGACTGGTATTCTTAACTATGTTGCTCCTTTACGCTATGTGGATACGCTGCTTAAATGCCTTTGTATCATGTAITG  
CTTCCCGTATGGCTTTCATTTCTCTCCTTTGTATAAATCCTGGTGGTCTCTTTTATGAGGAGTTGTGGCCCGTTGTCAGGC  
AACGTGGCGTGGTGGCACTGTGTTGCTGACGCAACCCCACTGGTGGGGCATTGGCCACCCTGCAGCTCCCTTTCCGG  
GACTTTTCGCTTTCCCTCCTTATGCCACGGCGGAACTCATCGCCGCTGCCTTGGCCGCTGCTGGACAGGGGCTCGGCTG  
TTGGGACTGACAATTCGCTGGTGTGTCGGGAAATCCTCGTCTTCCCTTGGCTGCTGCCTGTGTGCCACCTGGATTT  
GCGCGGACGCTCTCTGCTAGTCCCTTCGGCCCTCAATCCAGCGGACCTTCTTCCCGCGCCGCTGTCGCGGCTCTGCGG  
CCTTCTCCGCTTCTCGCCTTCGCCCTCAGACGAGTGGATCTCCCTTTGGGCGCCCTCCCGCATCGATACCGTCGACCTCG  
AGCCTAGAAAAACATGGAGCAATCACAAGTAGCAATACAGCAGCTACCAATGCTGATTGTGCTGGCTAGGAAGCACAAGA  
GGAGGAGGAGGTGGGTTTTCCAGTCACACCTCAGGTACCTTTAAGACCAATGACTTACAAGGCAGCTGTAGATCTTAGCCA  
CTTTTTAAAAGAAAAGGGGGACTGGAAGGGCTAATTCACCTCCAAACGAAGACAAGATATCTTGTATCTGTGGATCTACCAC  
ACACAAGGCTACTTCCCTGATTGGCAGAACTACACACCAGGGCCAGGGATCAGATATCCACTGACCTTTGGATGGTGCTACA  
AGCTAGTACCAAGTTGAGCAAGAGAAGGTAGAAGAAGCCAAATGAAGGAGAGAAACACCCGCTTGTACACCCGTTAGCTGAGCTG  
CATGGGATGGATGACCCGGAGAGAGAAGTATTAGAGTGGAGGTTGACAGCCGCTAGCATTTTATCACATGGCCCGAGAG  
CTGCATCCGACTGTAAGTGGTCTCTCTGGTTAGACAGATCTGAGCTGGGAGCTCTCTGGTAACTAGGGAACCCACTGCT  
TGAAGCTCAATAAAGCTTCCCTTGGCTTCAAGTAGTGTCTTCAAGTAGTGTGTCGGCTGTGTTGTGACTCTGGTAACTAGATCCCTC  
AGACCTTTTATGCTAGTGTGAAAATCTTAGCAGGGCCCTTTAAACCCGCTGATCAGCCTCGACTGTGCCTTCTAGTTGC  
CAGCCTTGTGTTGCTTCCCTCCCGTGCCTTCTTCCCTGAAAGTGGCCACTCCACTGTCTTTCCTAATAAATGA  
GGAAATGCTCGATTGCTAGTAGTGTGCAITCTTCTTGGGGGTGGGGTGGGGCAGGACAGCAAGGGGAGGATTG  
GGAAGACAATGACAGGATGCTGGGATGCGGTGGGTCTTATGGCTTCTGAGGCGGAAAGAACAGCTGGGCTCTAGGG  
GGTATCCCAACGCGCCTGTAGCGGCCATTAAGCGCGGGGGTGTGGTGTGTTACGCGCAGCGTGCAGCCTTGCCA  
GCGCCCTAGCGCCGCTCCTTTTCGCTTCTTCCCTTCTTCGCAACGTTCCGCGGCTTTCCCGTCAAGCTCAAATCGG  
GGGCTCCTTTAGGTTTCCGATTTAGTGTCTTAGCGCACCTCGACCCAAAACACTTGTATTAGGGTGTGGTTCACAGTATGG  
GGCTATGCCCTGTAGACGCTTTCGCGCTTGTAGCCTTGTAGTGGAGTCCACGCTTGTAAATAGTGGACTCTGTTTCCAACTGGGA  
ACAACACTCAACCTATCTCGTCTATTCTTTTATGATTTAAGGATTTTCCGCTTTCGGCCTATTGGTTAAAAAATGAGCTG  
ATTTAAACAAAATTTAACCGCAATTAATCTGTGGAATGTGTGTCAGTTAGGGTGTGGAAAGTCCCGAGGCTCCCGAGCAGG  
CAGAAGTATGCAAAAGCATGCTCAATTAGTCAAGCAACAGGGTGTGAAAGTCCCGAGGCTCCCGAGCAGGCAAGATAT  
GCAAAGCATGATCTCAATTAGTCAAGCAACCATAGTCCCGCCCTAATCCCGCCATCCCGCCCTAATCCCGCCAGTCCCG  
CCCATTTCCCGCCCATGGCTACTAATTTTTTATTTATGACAGAGGCGGAGGCGCCCTGCTGCTGAGTATTCAGAAAGT  
AGTGAGGAGCTTTTTTGGAGGCTAGGCTTTTTCAAAAGAGTCCCGGGAGCTTGTATATCCATTTTCGGATCTGATCAGCA  
CGTGTGACAATTAATCATCGGCATAGTATATCGGCATAGTATAATACGACAAGGTGAGGAATAAACTATGGCCAAAGTTGAC  
CATGTCCGTTCCGCTGCTCACCAGCGCGAGCTGCGCGGAGCGGTGCGAGTTCTGGACCGACCGGCTCGGGTCTCCCGGGA  
CTTCTGGAGGACACTTCGCGGGTGTGGTCCGGGACGACTGACCTGTTTCAATCAGCGCGGCTCCAGGATCCGCTGATCAGCA  
GGACAACACCTTCCGCTGGGTGTGGTGGCGGCCCTGGAAGAGCTGTAGCAGGAGTGTGCGGAGTGGTCCGAGCTCAAGCACT  
TCCGGGACGCTTCCGGCGGCCATGACCGGATCCGCGAGCAGCCGCTGAGCAGCGCTGGGGCGGGAGTTCCGCGGAGGCGG  
GGCAACTGCGTCACTTCGTTGGCGAGGAGCAGGACTGACAGCTGCTACGAGATTTCCGATTCACCGCGCCCTTCTATGAA  
AGTTGGGCTTCGGAATCGTTTTCCGGGACGCGGCTGGATGATCTCCAGCGCGGGATCTCATGCTGGAGTCTTCGCGC  
ACCCCAACTTGTTTATTGCAAGCTTATAATGGTTACAAATAAAGCAATAGCATCAAAATTTCAAATAAATAATTTTTTTCAC  
TGCATTTAGTTGTTGTCCAACTCATCAATGTATCTTATCATGTCTGTATACCGTCGACCTTAGCTAGAGCTTGGCGT  
AATCATGGTATAGCTGTTTTCTGTGTAATGTTTATCCGCTCACAATTCACACAACATACGAGCCGGAAGCATAAAGTGT  
AAAAGCTGGGCTGCTAATAGTGTAGCTAATCACAATTAATTGCTTGGCTTGGCTCAGCTCCCGCTTTCAGTCCGAAACCTGT  
CGTGCCAGCTGCATTAATGAATCGGCAACGCGCGGGAGAGGCGGTTTCCGCTATTGGGCGCTTCCGCTTCTCGCTCAC  
TGACTCGTGGCTCGGTCTTCGGCTGCGGCGAGCGGTATCAGCTCAAAAGGCGGTAATACGGTTATCCACAGAATCA  
GGGATAACGAGCAAGAAAGACATGTGAGCAAAAGGCCAGCAAAAGGCCAGGAACCCGTAATAAAGCCGCTTGTGGCGT  
TTTTCCATAGGCTCCGCCCCCTGACGAGCATCAAAAATCGACGCTCAAGTCAGAGGTGGCGAAACCCGACAGGACTAT  
AAAGATACCAGGCTTTCCCTGGAAGCTCCCTCGTGCGCTCTCCTGTTCCGACCCTGCCGCTTACCGGATACCTGTCCG  
GAAGTGGTGGCTAACTACGGCTACACTAGAAGAACAGTATTGGTATCTGCGCTCTGCTGAAGCCAGTTCCTCGGAAAA  
AGAGTTGGTAGCTCTTGTATCCGGCAAAACAAACCACCGCTGGTAGCGGTGGTTTTTTGTGTTGAAGCAGCAGATTACCGCGCA  
GAAAAAAGGATCTCAAGAAGATCTTTGATCTTTTCTACGGGCTCAGCCTCAGTGGGAACGAAAACTCACGTTAAGGGA  
TTTTGGTATGAGATTATCAAAAAGGATCTTCACTAGATCTTTTAAATTAATAAATGAAGTTTTAAATCAATCTAAAGTATATA  
TGAGTAACTTGGTCTGACAGTTACCAATGCTTAATCAGTGAGGCACTATCTCAGCGATCTGTATTTCTGTTACATCATAGT  
TGCTGACTCCCGTCGTTGTAGATAACTACGATAAGGGAGGCTTACCATCTGCGCCCAAGTGTGCAATGATACCGGAGAC  
CCACGCTCACCGCTCCAGATTTATCAGCAATAAACAGCCAGCCGGAAGGGCGAGCGCAGAAGTGGTCTGCAACTTTA  
TCCGCTCCATCCAGTCTAATTAATGTTGCCGGGAAGCTAGAGTAAGTAGTTCGCGAGTAAATGTTGCGCAAGCTGTGTG  
CATTTGCTACAGGATCGTGGTGTACGCTCGTITGGTATGGCTTCAATCAGCTCCGGTCCCAACGATCAAGCGGAGTTA  
CATGATCCCATGTTGTGCAAAAAGCGGTTAGCTCCTCGGCTCCTCGATCGTTGTCAGAAGTAAGTTGGCCGAGTGT  
ATCACTCATGGTTATGGCAGCACTGCATAATCTCTTACTGTATGCCATCCGTAAGATGCTTTTCTGTGACTGGTGTAGTACTC  
AACCAAGTCAITTTGAGAATAGTGTATGCGGCGACCGAGTTGCTTCCCGCGGCTCAATACGGGATAAATACCGGCCACAT  
AGCAGAATTTAAAAGTGTCTCATTTGGAAAAGCTTCTCGGGCGGAAACTCTCAAGGATCTTACCCTGTTGAGATCCCA  
GTTGATGTAACCCACTCGTGCACCCAAGTATCTCAGCATTCTTACTTTCCAGCGCTTTCGGTGGTGAAGAAAAACAGG  
AAGCAAAATGCGCAAAAAAGGGAATAAGGGCGACAGGAAATTTGAATATCTACTACTCTTCTTTTCAATATTATGA  
AGCATTTATCAGGGTTATGTCTCATGAGCGGATACATAATTTGAATGATTTAGAAAAATAAACAAATAGGGGTTCCGCGCACA  
TTTTCCCGAAAAGTGCACCTGAC



TGGAAACAACACTCAACCCATCTCGGCTATTCTTTGATTATAAGGGATTTTGCCGATTCGGCCATTGGTTAAAAATGA  
GCTGATTAAACAAAATTAACCGGAATTAATTCTGTGGAATGTGTGTCAGTTAGGGTGTGGAAAGTCCCGAGGCTCCCGAG  
CAGGCAGAAAGTATGCAAAGCATGCACTCAATTAGTCAGCAACCAGGTGTGGAAAGTCCCGAGGCTCCCGAGCAGGAGAA  
GTATGCAAAGCATGCACTCAATTAGTCAGCAACCATAGTCCCAGCCCTAACTCCGCCATCCCGCCCTAACTCCGCCAGT  
TCCGCCATTCCTCCGCCCATGGCTGACTAATTTTTTTATTTATGACAGAGCCGAGGCCGCTCTGCTCTGAGTATCCAG  
AAGTAGTGAGGAGGCTTTTTTGGAGGCTAGGCTTTTGCAAAAGCTCCCGGGAGCTTGATATCCATTTTCGGATCTGATCA  
GCACGTGTGACAATTAATCATCGGCATAGTATATCGGCATAGTATAATACGACAAGGTGAGGAACATAACCATGGCCAAAGT  
GACCAGTCCGCTTCCGGTGTCCACCGCGCGGACGTCCGGGAGCGGTGCGAGTTCTGGACCGACCGGCTCGGGTCTCCCG  
GGACTTCGTGGAGGACACTTCGCCGTTGTTCCGGGACGACGTGACCTGTTCATCAGCGCGGTCCAGGACAGGTGG  
TGCCGGACAACACCTGGCCTGGGTGTGGGTGCGCGGCTGGACGAGCTGTACGCCAGTGGTCCGAGGTGCGTCCACG  
AATTCGGGACGCTCCGGGCGGCCATGACCGAGATCGCGGAGCAGCCGTGGGGGCGGAGTTCGCCCTGCGCGACCC  
GGCCGCAACTGCGTGCACCTTCGTGCGGAGGAGCAGGACTGACACGTCTACGAGATTTTCGATTCCACCGCCCTCTA  
TGAAAGGTGTGGCTTCGGAATCGTTTTCCGGGACGCCGGCTGGATATCTCCAGCGCGGGATCTCATGCTGGAGTCTTC  
GCCACCCCAACTTGTATTTAGCTTATAATGGTTACAAAATAAGCAATAGCATCAAAAATTTCAAAAATAAGCATTTTTT  
TCACTGCATCTAGTTGTGGTTGTCCAACTCATCAATGTATCTTATCATGTCTGTATACCGTCCGACCTTAGCTAGAGCTTG  
GCCTAATCATGGTCAATGCTGTTCTCTGTGTGAAATTTTATCCGCTCAACAATCCACACAACATACGAGCCGGAAAGCATAAA  
GTGTAAGCCTGGGGTGCCTAATGAGTGAGCTAACTACATTAATTGCGTTGCGCTCACTGCCCTTTCCAGTCGGGAAAC  
CTGTGCTGCCAGTGCATTAATGAATCGGCCAACCGCGGGGAGAGGCGGTTTTCGCTATTGGGCGCTCTCCGCTCTCTCG  
TCACTGACTCGCTGCGCTCGGCTCTCGGCTGCGCGGAGCGGTATCAGCTCACTCAAAGGCGGTAATACGGTTATCCACAGA  
ATCAGGGGATAACGCAAGGAAAGAACATGTGAGCAAAAAGGCCAGCAAAAAGGCCAGGAACCGTAAAAGGCGCGGTTGTG  
GCGTTTTTCCATAGGCTCCGCCCTTGCAGGACATCAAAAATCGACGCTCAAGTCAGAGGTGGCGAAACCGACAGGA  
CTATAAAGATACCAGGCTTTCCCTTGGAAAGCTCCCTCGTGGCTCTCTCTGTTCCGACCTGCGCTTACCGGATACCTGT  
CGCTTTCTCCCTTCCGGGAAAGCGTGGCGCTTTCTCATAGCTACGCTGATAGGTATCTCAGTTCCGGTGTAGGTCGTTCCG  
AGCTGGGTGTGTGACGAAACCCCGCTCAGCCGACCGCTGCGCTTATCCGTAACATCTGTTAGTCCAAACCGGT  
AAGACAGCATTTACTGCCACTGGCAGCAGCCACTGGTAACAGGATAGCAGAGCGAGGTATGAGGCGGTCTACAGAGTT  
CTTGAAGTGGTGGCTAACTACCGCTACACTAGAAGAACAGTATTGGTATCTGCGCTCTGCTGAAGCCATCTCCGGA  
AAAAGAGTTGGTAGCTCTGATCGGCAAAACAAACCCCGCTGGTAGCGGTGGTTTTTTGTTTGAAGCAGCAGATTACCG  
GCAGAAAAAAGGATCTCAAGAAGATCTTTGATCTTTTCTACGGGCTGACGCTCAGTGAACGAAAACACTACGTTAAG  
GGATTTTGGTCAATGAGATTACAAAAGGATCTCACCTAGTCTTTTAAATTAATAAAATGAAGTTTAAATCAATCAAAGTA  
TATATGAGTAAACTTTGGTCTGACAGTTACCAATGCTTAATCAGTGAAGCCACTATCTCAGCGATCTGTCTAATTCGTTCA  
TAGTTGCGCTGCTAGATAACTACGATAACGGGAGGGCTTACCATCTGGCCCAAGTGTGCTGATGATACCGCG  
AGACCCACGCTCACCGCTCCAGATTATCAGCAATAAACAGCCAGCCGGAAGGGCCGAGCGCAGAAGTGGTCTGCAA  
TTTTATCCGCTCCATCAGTCTATTAATTTGTTGCCGGAAGCTAGAGTAAGTATGTCGCAAGTAAATGTTGCGCAACGTT  
GTTGCCATTGCTACAGGCACTGTTGTTGTCACGCTCTGCTGTTGGTATGGCTTTCATTCAGCTCCGGTTCCCAACGATCAAGGCG  
AGTTACATGATCCCATGTTGTGCAAAAAGCGGTTAGCTCTTCCGCTCTCCGATCGTTGTCAGAAGTAAGTTGGCCGCA  
GTGTTATCACTATGGTTATGCGAGCACTGCATAATCTCTTACTGTATGCTATCCGTAAGATGCTTTCTGTGACTGGTGTAG  
TACTCAACCAAGTCACTTCTGAGAATAGTGTATGCGCGGACCGAGTTGCTCTTTGCCCGGCTCAATACCGGATAAATACCGCG  
CACATAGCAGAACTTAAAAGTGCTATCAITGGAAAACGTTCTTCCGGGCGAAAACCTCAAGGATCTTACCCTGTTGTAG  
ATCCAGTTGATGTAACCACTCGTGCACCAACTGATCTTACGATCTTTTACTTTTACCAGCGTTTCTGGGTGAGCAAAAA  
CAGGAAGGCAAAATCCGCAAAAAGGGAATAAAGGGCAGCAGGAAATGTTGAATACTCACTACTCTCTCTTTTCAATATA  
TTGAAGCATTTATCAGGGTATTGTCTCATGAGCGGATACATAATTTGAATGATTTAGAAAAATAAACAAATAGGGGTTCCCGG  
CACATTTCCCGGAAAAGTCCACCTGAC

Supplemental plasmid sequence No. 4

lenti-PURO-T2A-(HLA-A\*11:01)-E2A-(Tag-A\*11:01)-P2A-EGFP:

GTCGACGGATCGGGAGATCTCCGATCCCTATGTTGACTCTCAGTACAATCTGCTCTGATGCCGATAGTTAAGCCAGTAT  
CTGCTCCCTGCTTGTGTGTGGAGGTCGCTGAGTAGTGCCGAGCAAAAATTAAGCTACAACAAGGCAAGGCTTGACCGAC  
AATTGCATGAAGAATCTGCTTAGGGTTAGGCGTTTTGCGCTGCTTCCGATGTACGGGCGAGATATACCGGTGACATTGATT  
ATTGACTAGTTATTAATAGTAATCAATACGGGCTCATTAGTTCATAGCCATATATAGGAGTCCCGGTTACATAACTTACGGTA  
AATGGCCCGCTGGCTGACCGCCCAACGACCCCGCCATTTGACGTCAATAATGACGTATGTTCCCATAGTAAACGCAATAG  
GGACTTTCCATTGACGTCAATGGGTGGAGTATTTACGGTAAACTGCCACTTGGCAGTACATCAAGTGTATCATATGCCAAGT  
ACGCCCTTATTGACGTCAATGACGGTAAATGGCCCGCTGGCATTATGCCAGTACATGACCTTATGGAAACTTTCTACTTG  
GCAGTACATCTACGTATTATGCTATGCTATTACCATGGTGTATGCGGTTTTGGCAGTACATCAATGGGCGTGGATAGCGGTTTGA  
CTCACGGGATTTCCAAGTCTCCACCCATTGACGTCAATGGGAGTTTGTGTTGGACAAAATCAACGGGACTTTCCAAAA  
TGTGTAACAACCTCCGCCCAATTGACGCAAAATGGGCGGTGAGCGGTGACGGTGGGAGGTTATATAAGCAGCGCGTTTTGCG  
TGACTGGGTCTCTGTTGTTAGACCAGATCTGAGCCTGGGAGCTCTGGTAACTAGGGAACCCACTGCTTAAAGCCTCAAT  
AAAGCTTGCTTGTAGTGTCAAGTAGTGTGTCGCGCTGTTGTTGTTGACTCTGGTAACTAGAGATCCCTCAGACCCCTTTA  
GTCAGTGTGAAAAATCTTAGCAGTGGCCCGCAACAGGGACTTGAAGCGAAAGGGAACAGAGGAGCTCTCTCGACG  
CAGGACTCGGCTGTGTAAGCGCGCACGGCAAGAGGCGAGGGGCGGCGACTGGTGTAGTACGCCAAAATTTGACTAGCG  
GAGGCTAGAAGGAGAGAGATGGGTGCGAGAGCGTCAATTAAAGCGGGGAGAATTAGATCGCGATGGGAAAAAATTCGG  
TTAAGGGCAGGGGGAAGAAAAATATAAATTAACATATAGTATGGGCAAGCAGGGAGCTAGAACGATTCGCAAGTAAATC  
CTGGCCTGTTAGAAACATCAGAAGGCTGTAGCAAAACTGGGACAGCTACAACCATCCCTTACAGACAGGATCAGAAAGC  
TTAGATCATATATAATACAGTAGCAACCTCTATTGTGTGTCATCAAGGATAGAGATAAAGACACCAAGGACGCTTTAGAC  
AAGATAGAGGAAGAGCAAAAAGTAAGACCACCGCACAGCAAGCGGCCGCTGATCTTACAGCTGGAGGAGGAGATA  
TAGGGGCAAAATGGAGAGTGAATATATAAATATAAAGTAGTAAAAATTAAGCAACATTAAGGAGTAGCACCCCAAGGCAAA  
GAGAAGATGGTGTGAGAGAGAAAAAAGAGCAGTGGGATAGGAGCTTTGTTCCCTTGGGTTCTTGGGAGCAGCAAGGACG  
ACTATGGGCGCAGGCTCAATGACGCTGACGGTACAGGCCAGACAATTAATGCTGGTATAGTGCAGCAGCAGAACAAATTTGC  
TGAGGGCTATTGAGGGCGCAACAGCATCTGTTGCAACTCACAGTCTGGGGCATCAAGCAGCTCCAGGCAAGAATCTGGCTG  
TGAAAGATACCTAAAGGATCAACAGCTCTGGGGATTTGGGGTTGCTCTGGAAAACTCATTTGACCCACTTCTGCTGCTG  
GAATGCTAGTTGGAGTAATAAATCTCTGGAACAGATTTGGAATCACAGCCTGGATGGAGTGGGACAGAGAAATTAACAAT  
TACACAAGCTTAATACACTCTTAATTGAAGAATCGCAAAACAGCAAGAAAAGAAATGAACAAGAAATTTGGAATTAGATA  
AATGGGCAAGTTTGGGAAATTTGTTAAACATAACAAATTTGGCTGTGGTATATAAATTAATTCATAATGATAGTAGGAGGCTTG  
TAGGTTAAGAAATGTTTTGTGCTACTTTCTATAGTGAATAGAGTTAGGCAGGGATATTACCATATTCTGTTTACAGCCACC  
TCCAACCCCGAGGGGACCCGACAGGCCCAAGGAATAGAAGAAGAAAGGTGGAGAGAGAGACAGACAGATCCATTCG  
ATTAGTGAACCGACTCGGCTGCGCAATTCTCGAGACAAATGGCAGTATTCATCCAAATTTTGAAGAAGAAAGGGGG

GATTGGGGGTACAGTGCAGGGGAAAGAATAGTAGACATAATAGCAACAGACATACAAACTAAAGAATTACAAAAACAAAT  
TACAAAAATTCAAAATTTTCGGGTTTATTACAGGGACAGCAGAGATCCAGTTTGGTTAATTAGCTAGCTAGGTCTTTGAAAGG  
AGTGGGAATTGCTCCGGTCCCGTCACTGGGGAGAGCGACATCCGCCACAGTCCCGGAGAAGTTGGGGGGAGGGGTCTG  
GCAATTGATCCGGTGCCTAGAGAAGGTGGCGCGGGTAAACTGGGAAAGTGTGTCGTGTAAGTGGCTCCGCTTTTCCCG  
AGGGTGGGGGAGAACCGTATATAAGTGCAGTAGTCGCCGTGAACGTTCTTTTCGCAACGGGTTTGGCCGAGAACACAGG  
ACCGGTTCTAGAGCCACCATGACCAGTACAAGCCACGGTGGCCCTGCCACCCGCGACGTCACCCGCGGCGGTACGC  
ACCTCGCGCGCGGTCGCGGACTACCCCGCCACGGGCCACACCGTTCGACCCGACCCGACATCGAGCGGGTACCCGAG  
CTGCAAGAACTTCTCACGCGCGTCCGGCTCGACATCGGCAAGGTGTGGTTCGCGGACGACGGCGCCGGGTGGCGGT  
CTGGACCACGCCGAGAGCGTGAAGCGGGGCGGTTCGCGGAGATCGGCCGCGCATGGCCGAGTTGACGGGTTCC  
GGCTGGCCGCGCAGCAACAGATGGAAGGCCCTCTGGCGCCGACCCGCGCAAGGAGCCGCGTGGTTCCTGGCCACCGTC  
GGCGTATCGCCGACCAAGGCAAGGGTCTGGGACGCGCGTCTGCTCCCGGAGTGGAGGGCGCGGAGCGCGCCGG  
GGTCCCGCTTCTGGAGACCTCCGCGCCCGCAACCTCCCTTACAGAGCGGCTCGGTTACCGTCAACCGGACGT  
CGAGGTGCCGAAGGACCGCGCCTGCTGATGACCCGCAAGCCGCGTGGCGGCTCCGGAGAGGGGAGGGGAAAGTCTGC  
TAACTGGCGCGAGTGGAGGAAAATCCCGCCCGGATCCATGGCCGTCATGGCGCCCGAACCTCTGCTACTCTC  
GGGGCCCTGGCCCTGACCCAGACCTGGGCGGGCTCCACTCCATGAGGTATTTTACACTCCGTGTCGGGCCGGCGC  
CGGGAGCCCCGCTTACGCCGTGGGCTACGTGGACGACACCGAGTTCGTGGGTTTCGACAGCGACCCGCGAGCCAGA  
GGATGGAGCCCGGGGCGCGTGGATAGAGCAGGAGGGCGCGGAGTATTGGGACAGGAGACACGGAATGTGAAGGCCA  
GTCACAGACTGACCGAGTGGACCTGGGGACCTCGCGGCTACTACAACCAGAGCGAGGACGGTTCACACCATCCAGAT  
AATGTATGGCTGCGACGTGGGGCCGGACGGGCGTTCCTCCGCGGTACCGGACGAGCGCTACGACGGCAAGGATTACAT  
CGCCGTGAACGAGGACCTGCGCTCTTGGACCGCGCGGACATGGCAGCTCAGATCACAAGCGCAAGTGGGAGCGCGC  
ATGGCGGGAGCAGCAGAGAGCTACTGGAGGGCGGTGCGTGGAGTGGCTCCGAGATACCTGGAGAACGGGAAGGA  
GACACTGCGAGCGACGGACCCCGCAAGACACATATGACCCACCCATCTCTGACCATGAGGCCACCTGAGGTGCTG  
GGCCCTGGCTTCTACCTGGCGAGATCACACTGACCTGGCAGCGGGATGGGAGGACCAGACCCAGACAGCTCG  
TGGAGACCAGGCTGACGGGGATGGAACCTTCCAGAAGTGGGCGGTGTGGTGTGCTTCTGGAGAGGAGCAGAGATC  
ACCTGCCATGTGCAGCTAGGGTCTGCCAAGCCCTCACCTGAGATGGGAGTGTCTCCAGCCCACCATCCCATCC  
TGGCCATCTTCTGGGCTTCTCTTGGAGCTGTGATCCTGGAGCTGTGGTGCCTGGCGTATGGGAGGGAAGA  
GCTCAGATAGAAAAGGAGGGAGTTACACTCAGGCTGCAAGCAGTGCAGTGGCCAGGGCTGTGATGTGCTCTCACAGCT  
GTAAGTGCAGTGTACTAATTATGCTCTCTTGAATTTGGCTGGAGATGTTGAGAGCAACCCAGTCCCCTAGCCGTCATGGC  
GAGGCTGCAACAACTTCTCTGTGTAACAAAGCCGAGATGTCGAAGAGAATCCTGGACCGAGAGACAGAGATGGTGA  
GCAAGGGGAGGAGCTGTTCACCGGGGTGGTGCCTATCTGTCGAGCTGACCGGCGAGTAAACGGCCACAAGTTCAGC  
GTGTCGGCGAGGGGCGAGGGCGATGCCACTACCGCAAGCTGACCTGAAGTTCATCTGCAACCCGCGCAAGTGGCGGTG  
CCCTGGCCACCTCGTGACCCCTGACCTACGGCGTGCAGTGTCTCAGCCGCTACCCGACCACATGAAGCAGCAGC  
TTCTCAAGTCCCGATGCCGAAAGGCTACGTCAGGAGGCGACCTTCTTCAAGGACAGCGGCAACTACAAGACCCCG  
GCCGAGGTGAAGTTCGAGGGCGACACCTGGTGAACCGCATCGAGCTGAAAGGCGATCGACTTCAAGGAGGACCA  
CCTGGGCAACAAGCTGGAGTACAACAACAGCCACAAGCTTATATCATGGCCACAAGCAGAGAAGACGGCATCAAGGT  
GAACCTCAAGTCCCGCCACAACATCGAGGACGGCAGCGTGCAGTCCGCGACCACTACCAGCAGAACACCCCTCGGGC  
ACCGCCCGGTGTGTCGCGGACACCCACTACCTGAGCGAGTCAACCCGCTGAGCAAAAGACCCCAAGCGCGAT  
CACATGTTCTGTGGAGTTCGTGACCGCGCGGGATCCTCTCGCATGGACGAGCTGTACAAGTAACGTTCTATAGCT  
AAGAATTCGATCAAGCTTATCGGTAATCAACCTCTGGATTACAAAATTTGTGAAAGATTGACTGGTATCTTAATATGTTG  
CTCCTTTTACGCTATGGATACCGTGTCTTAAATGCCCTTGTATCATGCTATGCTTCCCGTATGGCTTTCATTTCTCCTCTG  
TATAATCTCTGGTTGTCTCTTTATGAGGAGTTGGGCCGTTGTCAGGCAACGTTGGCGTGTGTGCACTGTGTTGCTGA  
CGCAACCCCACTGGTTGGGGCAITGGCCACCCTGTAGCTCCTTCCGGGACTTTCGCTTCCCTCCCTTATTTGCCACGG  
CGGAACCTACCTCGCTGCTTCCCGCTGGTGGACAGGCGGCTCGGCTTGGGCACTGACAATTCCGTTGTTGGTGT  
GGAAATCATCTCCTTCTTGGCTGTGCGCTGTGTTGCCACTGGAATTCGCGGGAGCGTCTTCTGCTACGCTCCCTTCG  
GCCCTCAACTCAGCGCACTTCTTCCCGCGCTGTGCGGCTTTCGCGCTTTCGCGTCTTCGCTTCCGCTCAG  
CGAGTCGATCTCCCTTTGGGCGCCTCCCGCATCGATACCGTTCGAGCCTCGAGACCTAGAAAACATGGAGCAATCACAA  
GTAGCAATACAGCAGTACCAATGCTGATTGTCCCTGGTAGAAGCACAAGAGGAGGAGGAGGTGGGTTTCCAGTCAAC  
CTCAGGTACCTTTAAGACCAATGACTTACAAGCAGGTGATGATCTTAGCCACTTTTAAAGAAAAGAGGGGAGCTGGAAG  
GGTAATTCACCTCCAACGACAAGATATCTTATGATCTGTTGATCTACACACAAGGCTACTTCCCTGATTGGCAGAA  
CTACACACAGGGCCAGGGATCAGATATCCACTGACCTTTGGATGGTGTACAAAGTACAGCTTGAAGAAGAGGAGT  
AGAAAGGCAATGAAGGAGAGAACAACCCGCTTGTACACCCCTGTAGACCTGAGCTGCAATGGGATGGATGACCCGAG  
TATTAGAGTGGAGTTTACAGCCGCTAGCATTTCATCATATGGCCGAGAGCTGCATCCGACTGTACTGGTCTCTCTGT  
GTTAGACAGATCTGAGCCTGGGAGCTCTCTGGTAACACTAGGGAACCCACTGTGTAAGCTCAATAAAGCTTGCCTTGA  
CTTCAAGTGTGTTGGCCGTCTGTGTGTAAGTGGTAACACTAGAGATGACCTCAGACCCTTTTAGTCAAGTGTGGA  
TAGCAGGCCCCGTTTAAACCCGCTGATAGCCTCGACTGTGCTCTAGTTGCCAGCCATCTGTTGTTGCCCTCCCGGTG  
CCTTCTTACCCTGGAAGGTGCCACTCCACTGTCTTCTAATAAATGAGGAAATTCGATCGCATTGTCTGAGTAGGTG  
TCATTCTATTCTGGGGGTGGGGTGGGGCAGGACAGAAAGGGAGGATTGGGAAACAATAAGCAGGCTGGGGATG  
CGGTGGGCTCTATGGCTTCTGAGCGGAAAGAACCAGCTGGGGCTTAGGGGGTATCCCACCGCCCTGTAGCGCGCAT  
TAAGCGCGGGGTGTTGGTGTACGCGCAGCGTACCCGCTGACCTGACCAGCCCTAGCGCCCTAGCGCCGCTCTTCC  
CCCTCTTCTCGCCAGCTTCGCCGCTTCCCGCTCAAGCTCAAAATCGGGGGCTCCCTTTAGGGTTCCGATTTAGTGCT  
TAGGCCACTCGACCCAAAAAAGTGTATTGGGTGATGTTACAGTGTGGGCCATCGCCCTGATAGACGGTTTTTCCGCC  
TTTAGCCTGGAAGTCCAGTCTTAAATAGTGACTCTTTGGTCCAAAAGCTGGAACAACACTCAACCCATCTCGCTTA  
TTGATTTAAGGATTTTCCGCTTTCGGCTTATGGTTAAAAAATGAGTGAITTAACAAAAATTTAACCGGAATTAATCT  
GTGGAATGTGTGTCAGTTAGGGTGTGAAAGTCCCGAGCTCCCAAGCGAGGAGGAGATGCAAAAGCATGCTCAATA  
GTCAGAACCAAGTGTGGAAGTCCCGAGGTCCCGAGCGAGGAGGAGGAGGATGCAAAAGCATGCTCACTCAAGCAAC  
CATAGTCCCGCCCTAACTCCGCCATCCCGCCCTAACTCCGCCAGTTCGCGCCATTCGCGCCATGGCTGACTAATTT  
TTTTATTATGAGAGGCGAGGCCGCTCTGCCTCTGAGCTATTCCAGAAAGTGTGAGGAGGCTTTTGGAGGCGTAGG  
CITTTGCAAAAAGCTCCCGGAGCTGTATATCCATTTCCGATCTGATCAGACGTTGACAATAATGACCTCGCATGAT  
ATCGGCATAGTATAATAGCAAGGTGAGGAACTAAACATGGCCAAAGTGTACCAGTCCGCTTCCGGTGTACCCGCGC  
GACGTCCCGGAGCGTGCAGTTCTGGACCGACCGGCTCGGGTCTCCCGGACTCTGTTGGAGGACGACTTCGCGGTG  
GGTCCCGGACGACCTGCTACCGTGTACAGCGCGGTCAGGACCGGAGGAGTGGTGGCGGACAACCCCTGGCTGGGGTGG  
TGGCGCGCTGACGAGCTGTACCGCAGTGGTGGGAGTGTGTCCAGCACTCCGGGACGCTCCGGGCGGCCATG  
ACCGAGATCCGGAGCGCTGGGGCGGGAGTTCCGCTCGCGGACCCCGCCGCAACTGCGTGCCTTCTGTTGCCA  
GGAGCAGGACTACAGTGTACAGATTTTCATCCACCGCGCTTCTATGAAAAGGTTGGCTTCGGAATCGTTTCCGG  
GACCGCGCTGATGATCCCTCCAGCGCGGGATCTCATGCTGGAGTCTTCCGCCACCCAACTGTTATTTGACGTATAA  
TGTGTTACAAATAAAGCAATAGCATCAAAATTTCAAAATAAAGCAATTTTTTCACTGCACTTAGTTGGTGTCCAAAC  
TCATCAATGTATCTTATGCTGTATACCGCTGACCTTAGCTAGAGCTTGGCGTAATCATGGTATAGCTGTTTCTGTG  
AAATGTTATCCGCTCAAAATCCACACAACATAGCGCGGAAAGCATAAAGTGAAGGCTGGGTTGCCAATGAGTGGAG  
TAACTCAATTAATTGCGTTGCGCTCACTGCGGCTTCCAGTTCGGGAAACCTGTGCGTCCAGCTGCAATTAATCGCCCA  
ACCGCGGGGAGAGGCGGTTTGGCTATTGGCGCTTCTCCGCTTCTCGCTCACTGACTCGCTGCGCTCGGTCGTTCCGCTG

CGGGAGCGGTATCAGCTCACTCAAAGGCGGTAATACGGTTATCCACAGAATCAGGGGATAACGCAGGAAAGAACATGTGA  
GCAAAAGGCCAGCAAAAGGCCAGGAACCGTAAAGGCCGCGTGTGGCGCTTTTCCATAGGCTCCGCCCCCTGACGA  
GCATCACAAAATCGACGCTCAAGTCAGAGGTGGCGAAACCCGACAGGACTATAAAGATACCAGGCGTTTCCCCTGGAAAG  
CTCCCTCGTGCGCTCTCTGTTCCGACCTGCCGTTACCGGATACCTGTCCGCTTTCTCCCTTCGGGAAGCGTGGCGTTT  
CTCATAGCTACGCTGTAGGTATCTCAGTTCCGGTGTAGGTCGTTCCGCTCAAGCTGGGCTGTGTGCACGAACCCCGTTCA  
GCCCGACCGTGCCTTATCCGGTAACTATCGTCTTGAAGTCCAACCCGTAAGACACGACTTATCGCCACTGGCAGCAGCC  
ACTGGTAAACAGGATTAGCAGAGCGAGGTATGTAGGCGGTGTACAGAGTCTTGAAGTGGTGGCTAACTACGGCTACACTA  
GAAGAACAGTATTTGGTATCTCGCTCTGTGAAGCCAGTTACCTTCGGAAAAAGAGTTGGTAGCTCTTGATCCGGCAAAACA  
AACCACCCTGGTAGCGGTGGTTTTTTTTGTTTGAAGCAGCAGATTACGCGCAGAAAAAAGGATCTCAAGAAGATCTTT  
GATCTTTTACCGGGTCTGACGCTCAGTGGAACGAAAACCTACGTTAAGGGATTGTTGGTCAATGAGATTATCAAAAAGGATC  
TTCACCTAGATCTTTAAATTAATAAATGAAGTTTAAATCAATCTAAAGTATATATGAGTAACTTGGTCTGACAGTTACCAA  
TGCTTAATCAGTGAGGCACCTATCTCAGCGATCTGTCTATTTTCGTTTATCCATAGTTGCCGTGACTCCCGCTCGGTAGATAA  
ACGATACGGGAGGGCTTACCATCTGGCCCCAGTGCTGCAATGATACCGCGAGACCCACGCTCACCGCTCCAGATTATCAG  
CAATAAACAGCCAGCCGGAAGGGCCGAGCGCAGAAGTGGTCCGCAACTTTATCCGCTCCATCCAGTCTATTAATTGTTG  
CCGGGAAGCTAGAGTAAGTAGTTCGCCAGTTAATAGTTTTCGCAACGTTGTTGCCATTGCTACAGGCATCGTGGTGTACCGC  
TCGTCGTTTGGTATGGCTTATTCAGCTCCGGTTCACACGATCAAGGCGAGTTACATGATCCCCATGTTGTGCAAAAAAGC  
GGTTAGCTCTCCGGTCCCGATCGTTGTCAGAAGTAAAGTGGCCGAGTTATCACTATCGGTTATGGCAGCACTGATCA  
ATTCTTACTGTCTATGCCATCCGTAAGATGCTTTTCTGTGACTGGTGTACTCAACCAAGTCATTCTGAGAATAGTGTATGC  
GGCGACCGAGTGTCTTTCGCCGGGTCATAACGGGATAATACCGCGCCACATAGCAGAACTTTAAAGTGTCTATCTATGG  
AAAAGCTTTTCGGGGCGAAAACTCTCAAGGATCTTACCGCTGTTGAGATCCAGTTTCGATGTAACCCACTGCTGACCCAA  
TGATCTTACAGATCTTTTACTTTTACCAGGCTTTCTGGGTGAGCAAAAACAGGAAGGCAAAATGCCGCAAAAAAGGGAATA  
AGGGGACACGGAAATGTTGAATACTCATACTCTCTTTTTCAATATTATTGAAGCATTATCAGGGTTATTGTCTATGAGC  
GGATACATATTTGAATGATTATTAGAAAAATAAACAATAGGGGTTCCGCGCACATTTCCCGAAAAAGTGCCACCTGAC

Supplemental plasmid sequence No. 5

lenti-(HLA-A\*11:01)-KRAS-M:

GTCGACGGATCGGGAGATCTCCGATCCCTATGGTGCACCTCTCAGTACAATCTGTCTGATGCCGATAGTTAAGCCAGTAT  
CTGCTCCCTGCTGTGGTGGAGGTCGCTGAGTAGTGCGCGAGCAAAAATTAAGCTACAACAAGGCAAGGCTGACCCGAC  
AATTGCATGAAGAATCTGTAGGTTAGCGGTTTTCGCTGCTTCCGATGTACGGCCAGATATACCGGTTGACATGATT  
ATTGACTAGTTATTAATAGTAATAAATCAATTACGGGGTCAITAGTTTCAAGCCATATATGGAGTTCCGCGTTACATAA  
AATGGCCCGCTGGCTGACCGCCCAACGACCCCGCCATTGACGTCAATAATGACGTATGTTCCCATAGTAACGCCAAATG  
GGACTTTCCATTGACGTCAATGGGTGGAGTATTACGGTAAACTGCCCACTTGGCAGTACATCAAGTGTATCTGATGCA  
ACGCCCTATTGACGTCAATGACGGTAAATGGCCCGCTGGCATTATGCCAGTACATGACCTTATGGGACTTTCTACTT  
GCAGTACATCTACGTATTAGTCACTGCTATTACCATGGTGTATCGGTTTGGCAGTACATCAATGGGCGTGGATAGCGG  
CTCAGCGGGATTCCAAGTCTCCACCCATTGACGTCAATGGGAGTTTGTGTTGGCAACAAAATCAACGGGACTTTCCAAA  
TGTCGTAACAATCCGCCCATGACGCAAAATGGGCGTAGCGGTGTACGGTGGGAGGTCTATATAAGCAGCGGTTTTGGC  
TGACTGGGTCTCTGTTAGACAGATCTGAGCCTGGGAGTCTCTGGTAACTAGGGAAACCCACTGCTTAAAGCTCAAT  
AAAGCTTGCCTTGAGTGTCTCAAGTAGTGTGTGCCGCTCTGTTGTGACTCTGGTAACTAGAGATCCCTCAGACCCTTTA  
GTCAGTGTGAAAATCTCTAGCAGTGGCCCGCAACAGGGACTTTGAAAGCGAAAAGGGAAACAGAGGAGCTCTCTCGAC  
CAGGACTCGGCTGTGAAGCGCGCACGGCAAGAGGCGAGGGGCGGCGACTGGTGTAGTACGCCAAAAATTTGACTAGCG  
GAGGCTAGAAGGAGAGAGATGGGTGGCAGAGCGTCAGTATTAAAGCGGGGAGAAATAGATCGCGTGGGAAAAAATTCGG  
TTAAGGCCAGGGGAAAGAAAAAATATAAATAAACATATAGTATGGCAAGCAGGGAGCTAGAACGATTCCGAGTTAATC  
CTGGCTCTTAGAAACATCAGAAGGCTGTAGCAAAATCTGGGACAGCTACAACCATCCCTCAGACAGGATCAGAAGA  
TTAGATCAATATATAATAATACAGTACGCAACCCCTTATTGTGTGCATCAAGGATAGAGATAAAAGACACCAAGGAAT  
AAGATAGAGGAAGAGCAAAAACAAAGTAAGACCACCCGACAGCAAGCGGCGCTGATCTTACAGCTGGAGGAGGAGATA  
TAGGGACAAATTTGGAGAAGTGAATTAATAAATATAAAGTAAATAAATTTGAACCAATTTAGGAGTAGCAGCAAGGCA  
GAGAAAGTGGTGCAGAGAGAAAAGAGCAGTGGGAATGAGGAGCTTTGTTCTTGGGTTCTTGGGAGCAGCAGGAAGC  
ACTATGGGCGCAGCGTCAATGACCGTACAGGTCACAGGCCAGCAATTAATGTTCTGTTATAGTGCAGCAGCAGAACTAT  
TGAGGGCTATTGAGGGCGCAACAGCATCTGTTGCAACTCAGCATCTGGGGCATCAAGCAGCTCCAGCAAGATCCAGG  
TGGAAAGATACCTAAAGGATCAACAGCTCTGGGATTTGGGGTGTCTGTGAAAACCTAATTTGCACCCTGCTGTGCCTT  
GAATCTAGTGTGGAGTAATAAATCTCTGGAACAGATTTGGAATCACACGACCTGGATGGAGTGGGACAGAGAAATTA  
TACAAAAGCTTAATACACTCTTAATTGAAGAATCGCAAAAACAGCAAGAAAAGAAATGAACAAGAATATTGGAATTA  
AATGGCAAGTTTGTGGAATTTGTTAACATAACAATTTGGCTGTGGTATATAAATTAATCATAATGATAGTAGGAGCTT  
TAGGTTAAGAATAGTTTTTGTGTAATTTCTATAGTGAATAGAGTTAGGCAAGGATATCAACATTAATCGTTTCAGACCC  
TCCAAACCCCGAGGGGACCCGACAGGCCCCAAGGAATAGAAGAAGGTTGGAGAGAGAGACAGACAGATCCATTCG  
ATTAGTGAACGGATCGGCACTGCGTGTGCGCAATTCTGCAGACAAATGGCAGTATTCATCCACAATTTAAAAAGAAA  
GATTGGGGGTACAGTGCAGGGGAAAGAATAGTAGACATAATAGCAACAGACATACAACTAAAGAATTACAAAAACA  
AGGTTGGGGGAGAACCGTATATAAGTGCAGTAGTCCGCGTGAACGTTCTTTTCGCAACGGGTTTGGCCGAGAACAC  
ACCGGTTCTAGAGCCACTGACCGAGTACAAGCCACGGTGCAGCTCGCCACCCGCGAGCAGTCCCGGGGCGGTACGC  
ACCTCGCCCGCGTTCGCGACTACCCCGCCACCGGCCACACCGTGCAGCCGACCCGACATCGCCGAGAAAGTGGGG  
CTGCAAGAACTCTTCTACGCGCGTCCGGCTCGACATCGGCAAGGTTGGGTTCGCGGACGAGCGCGCCGCGGTGGCG  
CTGGACCACCGCGGAGAGCGTCAAGCGGGGGCGGTGTTCGCGAGATCGCCCGCGCATGGCCGAGTTGAGCGGTTCC  
GGCTGGCCGCGAGCAACAGATGGAAGGCTCTTGGCGCGCACCGGCCAAGGAGACCCCGCTCCGGAGAGGGGAA  
GGCGTATCGCCGACCACCAGGGCAAGGCTTGGGACGCGCGTCTGCTCCCGGAGTGGAGGCGCGGAGCGCGCGG  
GGTGGCCGCTTCTGAGACCTCCGCGCCCGCAACCTCCCTTCTACGAGCGGCTCGGTTACCGTACCCGCGAGCT  
CGAGGTGCCGAAAGACCGCGCACCTGGTGCATGACCCGCAAGCCCGTGGCGGCTCCGGAGAGGGGAAAGTCTGC  
TAACCTGGCGGACGTGGAGGAAAATCCCGCCCGGATCCATGGCCGTCATGGCGCCCGAACCTCTCTGCTACTCTC  
GGGGCCCTGGCCCTGACCCAGACCTGGGCGGGTCCCCTCATGAGGTTATTCTACACCTCCGTGTCCCGCCCGGCG  
CGGGGAGCCCGCTTACATCCCGTGGGCTACGTGGACGACACGCAAGTTCGTGCGGTTTCGACAGCGACCGCGGAG  
GGATGGAGCCCGGGCGCGGTGATAGAGCAGGAGGGCGGGAGTATTGGGACAGGAGACACGGAATGTGAAGGCCA  
GTCACAGACTGACCGAGTGGACCTGGGACCTCGCGGCTACTACAACAGAGCGAGGACGGTTCTCACACATCCAGAT  
AATGTATGCTGCGAGTGGGGCGGACGGGCGCTTCTCCCGGGTACCAGGAGCGCTACGACGCAAGGATTACAT



CGCCCTGAACGAGGACCTGCGCTCTTGGACCGCGGGGACATGGCAGCTCAGATCACCAAGCGCAAGTGGGAGGCGGCC  
ATGCGGGGAGCAGCAGAGAGGCTACTGGAGGGCCGGTGGGTGGAGTGGCTCCGCAGATACCTGGAGACCGGGAAGGA  
GACACTGCAGCGCAGGACCCGCAAGACACATATGACCCACCCCTCTCTGACCATGAGGCGAGGAGGTGCTG  
GGCCTGGGCTTCTACCTGCGGAGATCACACTGACCTGGCAGCGGGATGGGAGGACCAGACCCAGGACACGGAGCTCG  
TGAGAGCAGGCTGCAGGGGATGGAACCTTCCAGAAAGTGGGCGCTGTGGTGGTGCCTTCTGGAGAGGAGCAGAGATAC  
ACCTGCCATGTGCAGCATGAGGGTCTGCCAAGCCCTCACCTGAGATGGGAGCTGTCTCCAGCCACCATCCCATCC  
TGGGCATCATTGCTGGCCTGGTCTCTTGGAGCTGTGATCACTGGAGCTGTGGTCTGCTCCGTGATGTGGAGGGAAGA  
GCTCAGATAGAAAAGGAGGGAGTTACTACTAGGCTGCAAGCAGTGACAGTGCCAGGGCTCTGATGTGTCTCTCACAGCTT  
GTAAAGTGCAAGTACTAATTATGCTCTTTGAAATTGGCTGGAGATGTTGAGAGCAACCCAGGTCCTTAGCCGATAGGCT  
GAGCGCTGCAACAACCTTCTCTGCTGAAACAAGCCGGAGATGTCGAAGAGAATCTGGACCGGTAGTTGGAGCTGATGG  
CGTAGGCAAGTAGCCTAAGAATTCGATATCAAGCTTATCGGTAATCAACCTCTGGATTACAAAATTTGTGAAGATTGACTGG  
TATTCTTAACTATGCTCTTACGCTATGTGGATACGCTGCTTAAATGCTTTGTATCATGCTATTGCTCCCGTATGGCTT  
TCATTTCTCCTCTTGTATAAATCCTGGTGTCTCTTATAGGAGATTGTGGCCCGTTGTCAGGCAACGTGGCGGTGGT  
TGCACTGTGTTGGTACGCAACCCCACTGGTGGGCACTGGCCACCCTGTCAGTCTCTTCCGGGACTTCCGCTTCC  
CCCTCCATTGGCACGGCGGAACCTCATCGCCGCTGCTTGGCCGCTGCTGGACAGGGGCTCGGCTGTGGGCACTGACAA  
TTCCGTTGGTGTGTGGGGAATCATCGTCTTCTTGGCTGCTCGCTGTGGTGGCCACTGGATTCTGGCGGGACGCTCT  
CTGCTACGTCCTTCCGCTCAATCCAGCGGACCTTCTTCCCGGGCTGTGCTCCGCTCTGCGGCTCTGCGGCTCTCCGCTT  
CGCTTCCGCTCAGACGAGTGGATCTCCTTGGGCGCCTCCCGCATCGATACCGTCGACCTCGAGACCTAGAAAAAC  
ATGGAGCAATCAAGTAGCAATACAGCAGCTACCAATGTGATTGTGCTGGCTAGAAAGCACAAGAGGAGGAGGAGGTGG  
GTTTTCCAGTCAACCTCAGGTACCTTTAAGACCAATGACTTACAAGGAGGAGCTGTAGATCTTAGCCACTTTTAAAAAGAAA  
GGGGGACTGGAAGGGCTAATCACTCCCAACGAAGACAAGATATCTTGTATCTGTGGATCTACCACACAAAGGCTACTTC  
CCTGATTGGCAGAACTACACACCAGGGCCAGGGATCAGATATCCACTGACCTTTGGATGGTGTACAAGCTAGTACCAGTTG  
AGCAAGAGAAGGTAGAGAAGCAATGAAGGAGAGAACCAGGCTTGTACACCTGTGAGCTGTGAGCTGTGAGATGATGAC  
CCGGAGAGAGAAGTATTAGAGTGGAGTTTACAGCCGCTAGCAATTCATCATAGGCGGAGAGCTGCATCCGACTGT  
ACTGGTCTCTCTGGTGTAGACAGATCTGAGCTGGAGCTCTCTGGTAACTAGGGAACCCACTGCTTAAAGCTCAATAAA  
GTTTCCCTTGTAGTGTCAAGTAGTGTGTGCCCTGTCTTGTGTGACTCTGGTAACTAGAGATCCCTCAGACCTGAGGATGAC  
GTGTGAAAATCTCTAGCAGGGCCGTTTAAACCCGCTGATCAGCCTCGACTGTGCCCTCTAGTTGCCAGCCATCTGTGTTT  
GCCCTCCCGCTGCTCTTCCCTGACCTGGAAGGTGCCACTCCACTGTCTTCCATAAAAATGAGGAAATGATGCATCGCAT  
TGTGTAGTAGTGTCAATCTATTCTGGGGGTGGGGTGGGCGAGGACAGCAAGGGGAGGATTGGGAAGACAATAGCAG  
GCATCTGGGGATCGGTTGGCTCTATGGCTCTGAGGCGGAAAGAACAGCTGGGGCTTAGGGGTATCCCAACGCGCC  
CTGTAGCGGCTAAGCGCGGGGTGTGGTGTACGCGCAGGCTGACCGCTACACTTGCACCGCCCTTAGCCGCTTCCGCTG  
TCCTTTCGCTTTCCTCTCTTCTCGCCACGTTCCGCGCTTCCCGCTCAAGCTCTAAATCGGGGCTCCCTTAGGGTT  
CCGATTAGTGCTTTACGGCACCTCGACCCCAAAAACCTGATTAGGGTGTGGTTCACGTAGTGGGCCATCGCCCTGATAG  
ACGGTTTTTCGCCCTTTGACGTTGGAGTCCACGCTTCTTAAATAGTGACTCTTGTTCACAACTGGAACAACACTACCTAT  
CTCGGTCTATTCTTTGATTTATAAGGATTTTCCGATTTCCGCTATTGGTTAAAAAATGAGCTGATTTAACAAAAATTTAA  
CGGAAATTAATCTGTGGAATGTGTGTAGTTAGGGTGTGGAAAGTCCCCAGGCTCCCGAGGCAAGAGATGCAAAAGC  
ATGCATCTCAATTAAGTCAAGCAACCAGGTGTGGAAAGTCCCGAGGCTCCCGAGCAGGCAAGATGCAAAAGCATCTC  
AATTAGTCAAGCAACATAGTCCCGCCCTAATCCGCCATCCCGCCCTAATCCGCCAGTTCGCCCTTCTCCGCCCCA  
TGGCTGACTAATTTTTTATTTATGACAGAGCCGAGGCGCCCTGCTGCTGAGTATTTCCAGAAAGTAGTGAGGAGGCTTTT  
TTGGAGGCTAGGCTTTTTCAAAAGCTCCCGGAGCTTGTATATCCATTTTCCGGATCTGATCAGCAGCTGTGACAATTAAT  
CATCGGCATAGTATATCGGCATAGTATAATACGACAAGGTGAGGAACATAACATGGCCAAAGTTGACCAAGTCCCGT  
GCTCACCGCGCGCAGCTCGCCGAGCGGTCTGAGTCTGACCGACCGGCTCGGGTCTCCCGGGACTTCGTGGAGGACG  
ACTTCCCGGTGTGGTCCCGGACGACGCTGTTTCATCAGCGCGTCCAGGACAGGTTGGTCCCGGACCCACTG  
GCCTGGGTGTGGTGCAGCGCTGACGCGAGTGGTGGAGGCTGCTGACGCAACTCCCGGAAGGCTTCCGGAAGCCTC  
CGGCGCGCTATGAGGATCGGCGAGCAGCTGGGCGGGAGTTTCCGCTGCGCGACCCCGGCACTGCGTGGC  
ACTTCTGGCGGAGGAGCAGGACTGACACGCTGCTACGAGATTTCCATTCCACCGCGCTTCTATGAAAGGTTGGGCTTCG  
GAATCGTTTTCCGGACCGCGGCTGGATGATCTCCAGCGGGGATCTCATGCTGGAGTTCTTCGCCACCCCAACTTGT  
TATTGACGCTTATAATGGTTACAATAAAGCAATAGCATCACAAATTTCAAAAATAAAGCATTTTTTTTCACTGACTGATTG  
TGGTTTGTCCAAACTCATCAATGTATCTTATCATGTCTGTATACCGTCGACCTCTAGCTAGAGCTTGGCGTAATCATGGTCATA  
GCTGTTCCTGTGTGAAATTTTATCCGCTCACAAATCCACACAACATACGAGCCGGAAGCATAAAAGTGAAGCCTGGGGT  
GCCTAGTGTAGTACGTAACATCAATTAATGCGTTCAGCTGCGCTTCCAGTCCGGAAACCTGTCTGTCAGCTGCT  
ATTAATGAATCGGCCAACGCGGGGAGAGGCGGTTTGGCTATTGGGCGCTTCCCGCTTCTCGCTACTGACTCGCTGCG  
CTCGGTCTGCTGGTCCGGGAGCGGTATCAGCTCAAAAGCGGTAATACGTTATCCACAGAAATCAGGGGATAACGCA  
GGAAGAACATGTGAGCAAAAAGGCCAGCAAAAGGCCAGGAACCGTAAAAAGCCCGCTTGTGGCGTTTTTCCATAGGCT  
CCGCCCCCTGACGAGCATCAAAAATCGACGCTCAAGTCAAGAGTGGCGAAACCCGACAGGACTATAAAGATACCAGG  
CGTTTTCCCTGGAAGCTCCCTCGTGCCTCTCTGTTCCGACCTGCGCTTACCGGATACTGTCCGCTTCTCCCTTCG  
GGAAGCGTGGCGTTTTCTCATAGCTACGCTGATAGTATCTCAGTTCGGTGTAGGTCGTTCCGCTCAAGCTGGGCTGTGTG  
ACGAACCCCGTTCAGCCGACCGCTGCGCTTATCCGTAACATCGTCTTGTAGTCCAACCCGGAAGACAGCACTTATC  
GCCACTGGCAGCAGCCTGGTAACAGGATTAGCAGAGCGAGGTATGTAGGCGGTGCTACAGAGTTCTTGAAGTGGTGGCC  
TAACTACGCTACACTAGAAAGACAGTATTGGTATCTGCGCTCTGCTGAAGCCAGTTACCTTCGGAAAAAGAGTGGTAGC  
TCTTGTATCCGGCAAAAACACCAGCTGGTAGCGGTGGTTTTTTTGTGTGCAAGCAGCAGATTACGCGCAGAAAAAAGGA  
TCTCAAGAAAGATCTTTGATCTTTTACGCGGCTGACGCTCAGTGAACGAAAACCTACGTTAAAGGATTTTGGTCAATGA  
GATTATCAAAAAGGATCTTACCTAGATCTTTTAAATTAATAAATGAAGTTTTAAATCAATCTAAAAGTATATATGAGTAACTT  
GGTCTGACAGTTACCAATGCTTAATCAGTGAAGGCATCTCAGCAGTCTGTCTATTTCGTTATCCATAGTTGCCTGACTCC  
CCGTCTGTAGATAACTACGATACGGGAGGGCTTACCATCTGGCCCAAGTGTGCAATGATACCGCGAGCCACAGCTCAC  
GGCTCCAGATTATCAGCAATAAACCAGCCAGCCGAAGGGCCGAGCGCAGAAGTGGTCTGCAACTTTATCCGCTCCATC  
CAGTCTAATAATTTGCGGGGAGGCTAGAGTAAGTAGTTCCGCGATTAATAGTTTGGCAACGTTGTTGCCAATTGCTACAGG  
CATCGTGGTGCACGCTCGTCTGTTGGTATGGCTTATCAGCTCCGGTTCACACATCAAGGCGAGTTACATGATCCCCCA  
TGTGTGCAAAAAGCGGTAGCTCTTCCGCTCCGATCGTTGTCAGAAAGTAAAGTTGGCCGAGTGTATCACTCATGGT  
TATGGCAGCACTGCATAATCTTACTGTCATGCCATCCGTAAGATGCTTTTCTGTGACTGGTGGTACTCAACCAAGTCAAT  
CTGAGAATAGTGTATGCGGCGACCGAGTTGCTTTCGCCGCGTCAATACCGGATAATACCGCGCACATAGCAGAACTTTA  
AAAGTGCTCATCAATGGAAAACGTTCTCCGGGCGAAAACCTCAAGGACTTACCCTGTTGAGATCCAGTTCGATTAAC  
CCACTCGTGCACCAACTGATCTTACGATCTTTTACTTCCAGCGCTTCTGGTGAGCAAAAACAGGAAGGCAAAATGCG  
CGCAAAAAGGGAATAAGGGCGACCGAAATGTTGAATACTACACTCTTCTTTTCAATATTATTGAACGATTTCCCAAGG  
GTTATTGTCTCATGAGCGGATACATATTGAATGATTTAGAAAAATAAACAATAGGGGTTCCGCGCACATTTCCCGAAAA  
GTGCCACTGAC

Supplemental plasmid sequence No. 6

lenti-(HLA-A\*11:01)-KRAS-W:

GTCGACGGATCGGGAGATCTCCCGATCCCCTATGGTGACTCTCAGTACAATCTGCTCTGATGCCGCATAGTTAAAGCCAGTAT
CTGCTCCCTGCTTGTGTGGAGGTCGCTGAGTAGTGCCGAGCAAAATTTAAGCTACAACAAGGCAAGGCTTGACCGAC
AATTCATGAAGAATCTGCTTAGGGTTAGGCGTTTTCGCTGCTTCGCGATGTACGGCCAGATATACCGGTTGACATTGATT
ATTGACTAGTTATTAATAGTAATCAATTACGGGGTCAATTAGTTCATAGCCCATATATGGAGTTCCCGGTTACATAACTACGGTA
AATGGCCCCCTGGCTGACCGCCCAACGACCCCCGCCATTGACGTCAATAATGACGTATGTTCCCATAGTAACGCCAATAG
GGACTTCCATTGACGTCAATGGGTGGAGTATTACGGTAACTGCCCACTTGGCAGTACATCAAGTGTATCATATGCCAAGT
ACGCCCTATTGACGTCAATGACGGTAAATGGCCCGCTGGCATTATGCCAGTACATGACCTTATGGGACTTTCCTACTTG
GCAGTACATCTACGTATTAGTCATCGCTATTACCATGGTGTATGCGGTTTGGCAGTACATCAATGGGCGTGGATAGCGGTTGA
CTCACGGGGATTCCAAGTCTCCACCCCATGACGTCAATGGGAGTTTGTGTTGGCACAAAATCAACGGGACTTCCAAAA
TGTCGTACAACCTCCGCCCATGACGCAAAATGGGCGGTAGGCGGTACGGTGGGAGGTCTATATAAGCAGCGGTTTGGCC
TGTACTGGGTCTCTGTTAGACAGATCTGAGCCTGGGAGCTCTGGTAACTAGGGAACCCACTGCTTAAAGCCTCAAT
TAAAGCTTGGCTTCAAGTAGTGTGTCGCCCTGTGTGTGACTCTGGTAACTAGAGATCCCTCAGACCCCTTTA
GTCAGTGTGAAAATCTTAGCAGTGGCCGCCGAACAGGGACTTGAAGCGAAAGGGAACAGAGGAGCTCTCTCGACG
CAGGACTCGGCTGTGAAGCGGCACGGCAAGAGGCGAGGGCGGGGACTGGTGTAGTACGCCAAAAATTTGACTAGCG
GAGGCTAGAAGGAGAGATGGGTGGGAGAGCGTCAGTATTAAAGCGGGGAGAATTAGATCGCGTGGAAAAAATTCGG
TTAAGGCCAGGGGAAAGAAAAATATAAATAAAACATATAGTATGGCAAGCAGGGAGCTAGAACCATTCCGAGTTAATC
CTGGCTTGTAGAAAACATCAGAAGGCTGTAGACAAATACTGGGACAGCTACAACCATCCCTCAGACAGGATCAGAAGAAC
TTAGATCATTTATATAATACAGTACCAACCCCTTATTGTGTCATCAAAGGATAGAGATAAAAGACACAAAGGAGGCTTGTAGAC
AAGATAGAGGAAGAGCAAAACAAAGTAAGACCACCGCACAGCAAGCGGCGCTGTATCTCAGACCTGGAGGAGGAGATA
TGAGGACAATTGGGAGAAGTGAATTTATATAAATAAAGTAGTAAAAATTGAACCATTAGGAGTAGCACCCCAAGGCAAA
GAGAAGAGTGGTGCAGAGAGAAAAAGAGCAGTGGGAATAGGAGCTTGTTCCTGGGTTCTTGGGAGCAGCAGGAAGC
ACTATGGGCGCAGCGTCAATGACCGTGCAGGTACAGGCCAGCAATTTATGCTGTATAGTGCAGCAGAGAAACATTTGC
TGAGGGCTATTGAGGGCAACAGCATCTGTGCAACTCACAGTCTGGGGCATCAAGCAGCTCCAGGCAAGAATCTGGCTG
TGGAAAGATACCTAAAGGATCAACAGCTCCTGGGATTTGGGTTGCTCTGGAATACTATTGCAACACTGCTGTGCCTTG
GAATGCTAGTTGGAGTAATAAATCTCTGGAACAGATTTGGAATCACACGACCTGGATGGAGTGGGACAGAGAAATTAACAAT
TACACAAGCTTAATACACTCCCTTAATTGAAGAATCGCAAAACAGCAAGAAAAAGAAATGAACAAGAATTTGGAAATTAGATA
AATGGGCAAGTTTGTGGAATTTGGTTAAACATAACAATTTGGCTGTGGTATATAAATTTATTCATAATGATAGTAGGAGGCTTGG
TAGGTTAAGAATAGTTTTTGTGCTACTTTCTATAGTGAATAGAGTTAGGCAGGGATATCCACATTAATCGTTTTAGACCCACC
TCCCAACCCCGAGAGGACCCGACAGGCCCGAAGGAATAGAAGAAGAGTGGAGAGAGAGACAGACAGATCCATTCCG
ATTAGTGAACGGATCGGCACTGCGTGCGCCAATTTCTGCAGACAAATGGCAGTATTCATCCACAATTTTAAAGAAAAAGGGGG
GATTTGGGGGTACAGTGCAGGGGAAAGAATAGTAGACATAATAGCAACAGACATACAACTAAAGAATTACAAAAACAAT
TACAAAAATCAAAATTTTCGGGTTTATACAGGGACAGCAGAGATCCAGTTTGGTTAATTAGCTAGCTAGGCTTTGAAAGG
AGTGGAAATTTGGCTCGGTCGCCGTCAGTGGGCAAGGCCACATCGCCACAGTCCCGGAGAAGTTGGGGGGAGGAGTCCG
GCAATTGATCCGGTGCATAGAGAAGGTGGCGGGGTAAACTGGGAAAGTGTGCTGTACTGGCTCCGCTTTTTCCCG
AGGGTGGGGGAGAACCGTATATAAGTGCAGTAGTTCGCGTGAACGTTCTTTTTTCGCAACCGGTTTGGCCGCAACACAGG
ACCGGTTCTAGAGCCACATGACCGAGTACAAGCCACGGTGGCGCTCGCCACCCGCGACGACGCTCCCGGGCGGTACGC
ACCTCGCCGCGCGCTCGCCGACTCCCGCCACCGCCACACCCGTCGACCCGGACCCGACATCGCGGATCCAGGATCCAGG
CTGCAAGAATCTTCTCACGCGCTCGGGCTCGACATCGGCAAGGTGTGGTTCGCGGACGACGCGCGCGCGGTGGCGGT
CTGGACCACCGGAGAGCGTGAAGCGGGGCGGTGTTCGCCAGATCGGCCCGGCATGGCCGAGTTGAGCGGTTCCCG
GGCTGGCCGCGGACGAACAGATGGAAGGCCTCTGGCGCCGACCCGCGGCAACCCGTCGACCCGGACCCGACATCGCGG
GGCGTATCGCCGACCACCAGGGCAAGGGTCTGGGACGCGCGTCTGCTCCCGGAGTGGAGGCGCGGAGCGCGCGCG
GGTGGCCGCTTCTGGAGACCTCCGCGCCCCGCAACCTCCCTTCTACGAGCGGCTCGGCTTACCCGTCACCCGCGAGCT
CGAGGTGCCGAAGGACCGCGACCTGGTGCATGACCCGCAAGCCCGGTGCGCGTCCGGGAGAGGGGAGGCTTGC
TAACTCGGGGACGTTGGAGGAAAATCCCGGCCCGGATCCATGGCCGTCATGGCGCCCGAACCCCTCTCTGCTACTCTC
GGGGCCCTGGCCCTGACCCAGACCTGGGCGGGTCCCCTCATGAGGATTTCTACACCTCCGTTGCCCGCCCGGCGG
CGGGAGCCCGCTTCAATCGCCGTGGGCTACGTGGACGACAGCAGTTCGTCGCGGTTTCGACAGGACGACAGGAGTCA
GGATGGAGCCCGGGCGCGGTGGATAGAGCAGGAGGGGCGGGAGTATTGGGACAGGAGACACGGAATGTGAAGGCCA
GTCACAGACTGACCGAGTGGACCTGGGACCTGCGCGCTACTACAACAGAGCGAGGACGTTTCTCACACCATCCAGAT
AATGTATGGCTGGAGCTGGGGCCGGACGGGCGCTTCTCCGCGGTTACCGGACGACGCTACGACAGGAGTACAT
CGCCCTGAACGAGGACCTGCGCTTGTGACCGCGCGGACATGGCAGCTCAGATCAACAGCGCAAGTGGGAGGGCGGCC
ATGGCGGGAGCAGAGAGAGCCTACCTGGAGGGCGGCTGGTGGAGTGGCTCCGAGATACCTGGAGAGAGAGGAGG
GACACTGCAGCGCACGGACCCCCCAAGACACATATGACCCACCACCCCTCTCTGACCATGAGGCCACCCTGAGGTGCTG
GGCCCTGGGCTTCACTCGCGGAGATCACTGACCTGGCAGCGGATGGGAGGACCAGACCCAGGACCGGAGCTCG
TGGAGACCAGCCCTGACGGGATGGAACCTTCCAGAAGTGGGCGGCTGGTGGTGGCTTCTGGAGAGGAGCAGAGATAC
ACCTGCCATGTGCAGCATGAGGCTGTGCCAAGCCCTCACCTGAGATGGGAGCTGTCTTCCAGGCCACCATCCCATCG
TGGCATCATTTGCTGGCTGGTTCTCTTGGAGCTGTGATCACTGGAGCTGTGGTGGCTGCGGTGATGTGGAGGAGGAAGA
GCTCAGATAGAAAAGGAGGGAGTTACACTCAGGCTGCAAGCAGTGCAGTGGCCAGGGCTCTGATGTGTCTCACAGCTT
GTAAGTGCAGTGTACTAATTATGCTCTTTGAAATTGGCTGGAGATGTTGAGAGCAACCCAGGTCCCTAGCCGTCATGGC
GAGCGTGCACAAACTTCTCTCTGCTGAAAACAAGCCGAGATGTGCAAGAGAATCTGGACCGGTAGTTGGAGCTGGTG
CGTAGGCAAGTACCAAGAAATTCGATATCAAGCTTATCGGTAATCAACCTCTGGATTACAAAATTTGTGAAAGATTGACTG
GTATTCTAACTATGTTGCTCTTTACGCTATGTGGATACGCTGTAAATGCCTTTGTATCATGCTATTGCTTCCCGTATGGCT
TTCATTTTCTCTCTGTATAATCTGGTTGCTGTCTTTATAGGAGTGTGGCCCGTTGTCAGGCAACGTTGGCGTGGT
GTGACTGTGTTGCTGACGCAACCCCACTGGTGGGACTTGGCCACCCTGTCAGCTCCTTTCCGGGACTTTCGGGTTTC
CCCTCCCTATTTCCACCGCGGAACCTACGCGCCCTGCCTTGGCCGCTGTGGACAGGGGCTCGGCTGTGGGCACTGACA
ATCCGTGGTGTGTGGGAAATCATGCTCTTTCCTGGCTGCTGGCTGTGTGGCACTGGATTCTGCGCGGGGACTCC
TTCTGTACGTCCCTTCGGCCCTCAATCCAGCGACCTTCTTCCCGCGGCTGCTGCCGCTTGGCGGCTTTCGGGCTCT
TCGCTTCCGCTCAGACGAGTGGATCTCCCTTTGGGCGGCTCCCGCATCGATACCGTCCGACCTGAGACCTAGAAAAA
CATGGACAATCACAAGTAGCAATACAGCAGTACCAATGCTGATTGTGCTGGCTAGAAGCACAAGAGGAGGAGGTG
GGTTTTCCAGTACACCTCAGGTACCTTAAAGACCAATGACTTACAAGGACGCTGTAGATCTTAGCCACTTTTTAAAGAAA
AGGGGGGAGTGAAGGGGTAATTTCACTCCCAACGAAAGACAAAGATATCTTGTATGTTGATCTACCAACAAGGCTACTT
CCCTGATTGGCAGAACTACACACCAGGGCCAGGATCAGATATCCACTGACCTTTGGATGGTGTACAAGCTAGTACCAGTT
GAGCAAGAGAAGGTAGAAGAAGCCAATGAAGGAGAGAACCCGCTGTTACCCCTGTGAGCTGCATGGATGGATGA
CCCGGAGAGAGAAGTATTAGAGTGGAGTTTGCAGCCGCTAGCATTCAATCATGCCCCGAGAGCTGCATCCGGACTGT
ACTGGGCTCTCTGTGTAGACCAGATCTGAGCTGGGAGCTCTGGTAACTAGGGAACCCACTGTTAAGCTCAATAAA
GCTTGCCTTGAAGTGTCAAGTAGTGTGCCGTGTGTGTGACTCTGGTAACATAGAGATCCCTCAGACCTTTTAGTCA
GTGTGGAAAATCTTAGCAGGGCCGTTTAAACCCGCTGATCAGCTCGACTGTGCCCTTAGTTGCCAGCCATCTGTTGTTT

GCCCTCCCCGTCCTTCCTTGACCTGGAAGGTGCCACTCCCCTGTCCTTTCCCTAATAAAATGAGGAAATTGCATCGCAT
TGTCAGTAGGTGTCATTTCTGTTGGGGTGGGGTGGGGCAGGACAGCAAGGGGGAGGATTGGGAAGACAATAGCAG
GCATGCTGGGGATGCGGTGGGCTCTATGGCTCTGAGGCGGAAAGAACCAGCTGGGGCTTAGGGGGTATCCCCACGCGCC
CTGTAGCGGCGCATTAAGCGCGGGGGTGTGGTGGTTACGCGCAGCGTGACCGCTACACTTGCCAGCGCCCTAGCGCCGC
TCCTTTCCGTTTCTCCCTTCTTCTCGCCACGTTGCGCCGGCTTCCCCTCAAGCTCTAAATCGGGGGCTCCCTTAGGGTT
CCGATTTAGTGCTTACGGCACCTCGACCCCAAAAAACTTGATTAGGGTGATGGTTACAGTAGTGGGCCATCGCCCTGATAG
ACGGTTTTTCGCCCTTGACGTTGGAGTCCACGTTCTTAATAGTGGACTCTGTTCACAACTGGAACAACACTCAACCCTAT
CTCGGTCTATTCTTTGATTTATAAGGGATTTTGGCGATTTCCGGCTATTGGTTAAAAAATGAGCTGATTTAAACAAAAATTTAA
CGCGAATTAATTCTGTGGAATGTGTGTCAGTTAGGGTGTGGAAGTCCCCAGGCTCCCCAGCAGGCAAGATGCAAAAGC
ATGCATCTCAATTAGTCAAGCAACCAGGTGTGGAAGTCCCCAGGCTCCCCAGCAGGCAAGATGCAAAAGCATGCATCTC
AATTAGTCAGCAACCATAGTCCCGCCCTAACTCCGCCATCCCGCCCTAACTCCGCCAGTTCGCCCATTTCCGCCCA
TGGCTGACTAATTTTTTTTATTTATGACAGAGGCGAGGCCGCTCTGCCTCTGAGCTATCCAGAAAGTAGTGAGGAGGCTTTT
TTGGAGGCTAGGCTTTTGCAAAAAGCTCCCGGAGCTTGTATATCCATTTTCGGATCTGATCAGCAGCTGTGACAATTAAT
CATCGGCATAGTATATCGGCATAGTATAATACGACAAGGTGAGGAACATAACCATGGCCAAGTTGACCAAGCTCCGCT
GCTCACCGCGCGCAGCTCGCCGAGCGGTGAGTTCTGGACCGACCGGCTCGGGTCTCCCGGACTTCGTGGAGGACG
ACTTCGCCGGTGTGGTCCGGGACGAGCTGACCCCTGTTATCAGCGGGTCCAGGACCGAGTGGTCCCGGACAACACCCTG
GCCTGGGTGTGGGTGCGCGGCTGGACGAGCTGTACGCCGAGTGGTCCGAGGTCGTGTCCACGAACCTCCGGGACGCTC
CGGGCCGCCATGACCGAGATCGCGGAGCAGCCGTGGGGCGGGAGTTCGCCCTGCGCGACCCGGCCGCAACTCGCTGC
ACTTCGTGGCCGAGGAGCAGGACTGACAGCTGCTACGAGATTTCCGATTCCACCGCCGCTTCTATGAAAGGTTGGGCTTCG
GAATCGTTTTCCGGGACGCGGCTGGATGATCTCCAGCGGGGATCTCATGCTGGAGTCTTCGCCACCCCAACTTGT
TATTGACGTTATAATGGTTACAAATAAAGCAATAGCATCACAAATTTACAAATAAAGCATTTTTTCACTGCAITCTAGTTG
TGGTTTGTCCAAACTCATCAATGTATCTTATCATGTCGTATACCGTCGACCTCTAGCTAGAGCTTGGCGTAATCATGGTCATA
GCTGTTCTGTGTAATGTTATCCGCTCACAAATCCACACAACATACGAGCCGGAAGCATAAAGTGAAGGTTAAAGCCTGGGGT
GCCTAATGAGTGAGTAACTACATTAATGCGTTGCGCTCACTGCCGCTTTCAGTCCGGGAAACCTGCTGCGCAGCTGC
ATTAATGAATCGGCCAACGCGCGGGGAGAGGGCGTTTGGTATTGGGCGCTCTTCCGCTTCTCGCTCACTGACTCGCTGCG
CTCGGTCGTTCCGGTGGCGGAGCGGTATCAGCTCACTCAAAGCGGTAATACGTTATCCACAGAATCAGGGGATAACGCA
GGAAGAACATGTGAGCAAAAGGCCAGCAAAAGGCCAGGAACCGTAAAAGGCCGCGTGTGCTGGCGTTTTCCATAGGCT
CCGCCCCCTGACGAGCATCAAAAATCGACGCTCAAGTCAGAGGTGGCGAAACCCGACAGGACTATAAAGATAACCAGG
CGTTTTCCCTGGAAAGCTCCCTCGTGCCTCTCTGTTCCGACCCTGCCGCTTACCGGATACCTGTCCGCCTTCTCCCTTCG
GGAAGCGTGGCGCTTCTCATAGCTCAGCGTGTAGGTATCTCAGTTCGGTGTAGGTGCTTCCGCTCAAGCTGGGCTGTGTGC
ACGAACCCCGCTTACGCGGACCGCTGCGCTTATCCGGTAACATATCGTCTTGTAGTCCAACCCGTAAGACAGCACTTATC
GCCACTGGCAGCAGCCACTGGTAACAGGATTAGCAGAGCGAGGTATGTAGGCGGTGCTACAGAGTTCTGAAGTGGTGGCC
TAACTACGGCTACACTAGAAGAACAGTATTTGGTATCTGCGCTCTGCTGAAGCCAGTTACCTTCGGAAAAAGAGTTGGTAGC
TCTTGATCCGCAAAACAAACCACCGCTGGTAGCGGTGGTTTTTTTGGTTTGAAGCAGCAGATTACGCGCAGAAAAAAGGA
TCTCAAGAAGATCCTTTGATCTTTTACGGGGTCTGACGCTCAGTGGAAACGAAAACCTCACGTTAAGGGATTTTGGTATGA
GATTATCAAAAAGGATCTTACCTAGATCCTTTAAATTAATAAATGAAGTTTTAAATCAATCTAAAGTATATATAGTAAACTT
GGTCTGACAGTTACCAATGCTTAATCAGTGAGGCACCTATCTCAGCGATCTGTCTATTTTCGTTTATCCATAGTTGCCGACTCC
CCGTCGTGTAGATAACTACGATACGGGAGGGCTTACCATCTGGCCCCAGTGTGCAATGATACCGCGAGACCCACGCTACC
GGCTCCAGATTTATCAGCAATAAACAGCCAGCCGGAAGGGCCGAGCGCAGAAGTGGTCTGCAACTTTATCCGCCTCCATC
CAGTCTATTAATTGTTGCCGGGAAGCTAGAGTAAGTAGTTCCGCAAGTTAATAGTTTGGCAACGTTGTTGCCAITGTACAGG
CATCGTGGTGTACCGTCTGCTGTTGGTATGGCTTCAATCAGCTCCGGTCCCAACGATCAAGGCGAGTTACATGATCCCCCA
TGTTGTGCAAAAAGCGGTAGCTCCTTCGGTCTCCGATCGTTGTGTCAGAAGTAAGTTGGCCGAGTGTATCACTCATGGT
TATGGCAGCACTGCATAATCTCTTACTGTGTCATGCCATCCGTAAGATGCTTTTCTGTGACTGGTGAGTACTCAACCAAGTCAAT
CTGAGAATAGTGTATGCGGCGACCGAGTTGCTCTTCCCGGCGTCAATACGGGATAATACCGCGCACATGACGAACTTTA
AAAGTCTCATCTGGAACAGTTCTTCCGGGCGAAAACTCAAGGATCTTACCGCTGTTGAGATCCAGTTCGATGTAAC
CCACTCGTACCCCAACTGATCTTACGATCTTTTACTTACCAGCGTTTCTGGGTGAGCAAAAACAGGAAGGCAAAAATGC
CGCAAAAAGGGAATAAGGGCGACCGGAAATGTTGAATACTATACTCTTCTTTTCAATATTATGAAGCAITTTATCAGG
GTTATTGCTCTATGAGCGGATACATATTTGAATGATTTAGAAAAATAACAATAGGGGTTCCGCGCACATTTCCCGAAAA
GTGCCACTGAC

## REFERENCES

- [1] Allegretti M, Fabi A, Buglioni S, et al. Tearing down the walls: FDA approves next generation sequencing (NGS) assays for actionable cancer genomic aberrations. *J Exp Clin Cancer Res* 2018;37:47.
- [2] Zhou SL, Zhou ZJ, Hu ZQ, et al. Genomic sequencing identifies WNK2 as a driver in hepatocellular carcinoma and a risk factor for early recurrence. *J Hepatol* 2019;71:1152-1163.
- [3] Li X, Xu W, Kang W, et al. Genomic analysis of liver cancer unveils novel driver genes and distinct prognostic features. *Theranostics* 2018;8:1740-1751.
- [4] Schulze K, Imbeaud S, Letouzé E, et al. Exome sequencing of hepatocellular carcinomas identifies new mutational signatures and potential therapeutic targets. *Nat Genet* 2015;47:505-511.
- [5] Totoki Y, Tatsuno K, Covington KR, et al. Trans-ancestry mutational landscape of hepatocellular carcinoma genomes. *Nat Genet* 2014;46:1267-1273.
- [6] Sawey ET, Chanrion M, Cai C, et al. Identification of a therapeutic strategy targeting amplified FGF19 in liver cancer by Oncogenomic screening. *Cancer Cell* 2011;19:347-358.
- [7] Lawson KA, Sousa CM, Zhang X, et al. Functional genomic landscape of cancer-intrinsic evasion of killing by T cells. *Nature* 2020;586:120-126.
- [8] Murugaesu N, Wilson GA, Birkbak NJ, et al. Tracking the genomic evolution of esophageal adenocarcinoma through neoadjuvant chemotherapy. *Cancer Discov* 2015;5:821-831.
- [9] Szolek A, Schubert B, Mohr C, et al. OptiType: precision HLA typing from next-generation sequencing data. *Bioinformatics* 2014;30:3310-3316.
- [10] McGranahan N, Rosenthal R, Hiley CT, et al. Allele-Specific HLA Loss and Immune Escape in Lung Cancer Evolution. *Cell* 2017;171:1259-1271.
- [11] Cunningham F, Allen JE, Allen J, et al. *Ensembl* 2022. *Nucleic Acids Res* 2022;50:D988-D995.
- [12] Jehl F, Degalez F, Bernard M, et al. CisRNA-Seq Data for Reliable SNP Detection and Genotype Calling: Interest for Coding Variant Characterization and -Regulation Analysis by Allele-Specific Expression in Livestock Species. *Front Genet* 2021;12:655707.
- [13] Reynisson B, Alvarez B, Paul S, et al. NetMHCpan-4.1 and NetMHCIIpan-4.0: improved predictions of MHC antigen presentation by concurrent motif deconvolution and integration of MS MHC eluted ligand data. *Nucleic Acids Res* 2020;48:W449-W454.
- [14] Lang F, Schrörs B, Löwer M, et al. Identification of neoantigens for individualized therapeutic cancer vaccines. *Nat Rev Drug Discov* 2022;21:261-282.
- [15] Boegel S, Castle JC, Kodysh J, et al. Bioinformatic methods for cancer neoantigen prediction. *Prog Mol Biol Transl Sci* 2019;164:25-60.
- [16] Cheng Y, Gunasegaran B, Singh HD, et al. Non-terminally exhausted tumor-resident memory HBV-specific T cell responses correlate with relapse-free survival in hepatocellular carcinoma. *Immunity* 2021;54:1825-1840.
- [17] Benvenuto M, Focaccetti C, Izzi V, et al. Tumor antigens heterogeneity and

- immune response-targeting neoantigens in breast cancer. *Semin Cancer Biol* 2021;72:65-75.
- [18] Kim S, Kim HS, Kim E, et al. Neopepsee: accurate genome-level prediction of neoantigens by harnessing sequence and amino acid immunogenicity information. *Ann Oncol* 2018;29:1030-1036.
- [19] Tan X, Li D, Huang P, et al. dbPepNeo: a manually curated database for human tumor neoantigen peptides. *Database (Oxford)* 2020;2020:baaa004.
- [20] Wang QJ, Yu Z, Griffith K, et al. Identification of T-cell Receptors Targeting KRAS-Mutated Human Tumors. *Cancer Immunol Res* 2016;4:204-214.
- [21] Xie X, Wang X, Liao W, et al. MYL6B, a myosin light chain, promotes MDM2-mediated p53 degradation and drives HCC development. *J Exp Clin Cancer Res* 2018;37:28.
- [22] Wooldridge L, van den Berg HA, Glick M, et al. Interaction between the CD8 coreceptor and major histocompatibility complex class I stabilizes T cell receptor-antigen complexes at the cell surface. *J Biol Chem* 2005;280:27491-27501.
- [23] Wooldridge L, Lissina A, Cole DK, et al. Tricks with tetramers: how to get the most from multimeric peptide-MHC. *Immunology* 2009;126:147-164.
