# Supplementary figures and images for: Dominant neoantigen verification in hepatocellular carcinoma by a single-plasmid system coexpressing patient HLA and antigen
Source: PubMed Central journal article supplement — J Immunother Cancer. 2023 Apr 17;11(4):e006334. doi: 10.1136/jitc-2022-006334 (PMC10124323; doi:10.1136/jitc-2022-006334), 2023-04-17

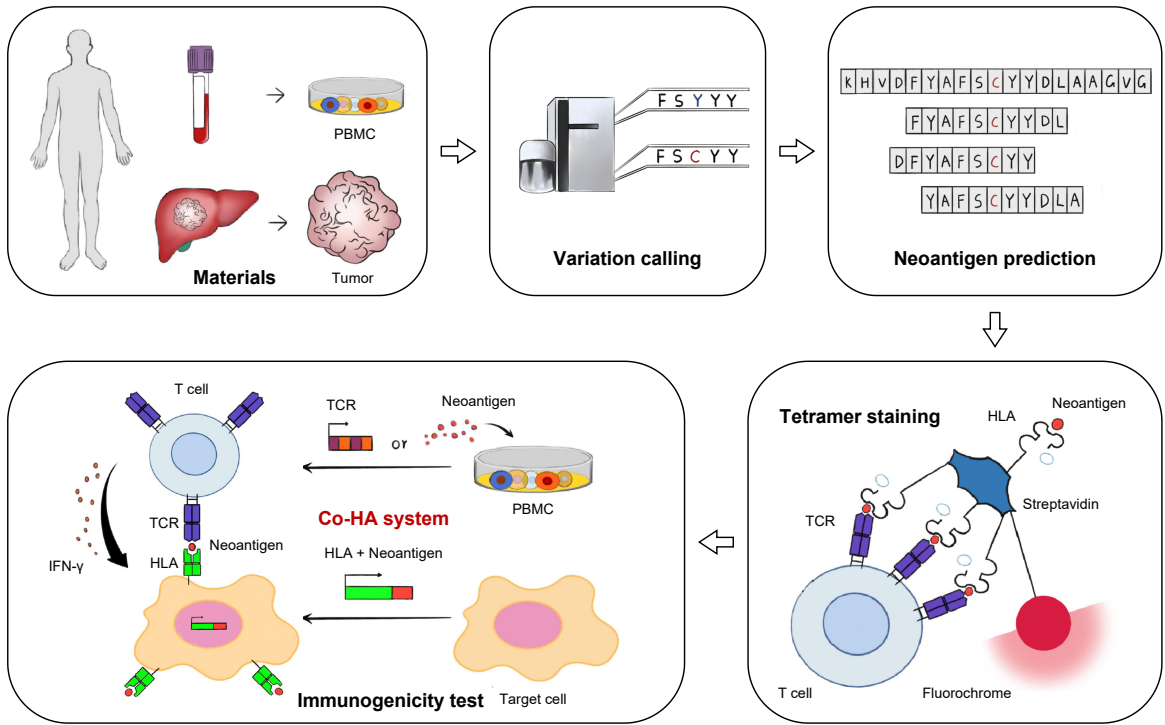

Supplement: jitc-2022-006334supp002.pdf [file jitc-2022-006334supp002.pdf]
